# Supplementary material for: Reprogramming of Trypanosoma cruzi metabolism triggered by parasite interaction with the host cell extracellular matrix
Source: PLoS Negl Trop Dis. 2019 Feb 6;13(2):e0007103. doi: 10.1371/journal.pntd.0007103 (PMC6380580; doi:10.1371/journal.pntd.0007103)
Supplement: S1 Table — Proteins identified with significative difference between Ty and MTy (T-Student Test, p < 0.05 for TMT normalized quantification (PCN)). p-Scores represent the confidence of protein identification by the software. Only proteins with p-score < e-7 were selected. (XLSX) [file pntd.0007103.s005.xlsx]

## Sheet: Proteome_T. cruzi ECM
Protein Group Name	Tritryp ID	Protein Name	Product Description	General Fuction	Cellular localization	Location	Length	Total Amino Acids	Sequence Coverage (%)	Sequence Coverage Unshared only (%)	Sequence Redundancy (%)	Numbers of Proteins	# of PSMs	# of Unique Peptides	# Shared Peptides	# PSMs in Experiment	# Unique Seq in Experiment	# Shared Peptides in Experiment	P-Score	# Quantified PSMs	# Quantified Peptides	(TMT 126C NL)	(TMT 127N NL)	(TMT 128C NL)	(TMT 129N NL)	(TMT 130C NL)	(TMT 131N NL)	(TMT 126C dNL)	(TMT 127N dNL)	(TMT 128C dNL)	(TMT 129N dNL)	(TMT 130C dNL)	(TMT 131N dNL)	(TMT 126C PC)	(TMT 127N PC)	(TMT 128C PC)	(TMT 129N PC)	(TMT 130C PC)	(TMT 131N PC)	(TMT 126C PCN)	(TMT 127N PCN)	(TMT 128C PCN)	(TMT 129N PCN)	(TMT 130C PCN)	(TMT 131N PCN)	SGD IDs	Gene Names	Average TY	Average MTy
PG3357	TcCLB.430605.40	2Fe-2S iron-sulfur cluster binding domain containing protein; putative	ERV/ALR sulfhydryl oxidase domain-containing protein	oxidation-reduction process	mitochondrion	TcChr7-S:271646-272554(+)	302	302	24.17	24.17	0	1	2	2	0	2	2	0	2.57809e-25	2	2	3654.83	4250.43	6130.54	8651.93	10088.8	10684	730966	850086	1.22611e+06	1.73039e+06	2.01776e+06	2.13679e+06	7743.28	8947.32	13104.7	18345.1	21270.5	22731.8	8674.73	14641.6	13341.9	18682.2	23755.7	22731.8	2Fe-2S	iron-sulfur	12219.4	21723.2
PG79	TcCLB.511627.150	3-oxoacyl-ACP reductase; putative	beta-ketoacyl-ACP reductase	Metabolism	mitochondrion	TcChr23-S:532971-533696(+)	241	241	16.6	16.6	0	1	3	2	0	3	2	0	1.15284e-19	1	1	82322.1	50815.6	82179.9	105692	125526	133920	1.08325e+06	668664	1.08138e+06	1.39076e+06	1.65175e+06	1.7622e+06	11475.1	7037.16	11559.3	14744	17411.3	18746.8	12855.4	11515.8	11768.5	15014.9	19445.5	18746.8	3-oxoacyl-ACP	reductase	12046.6	17735.7
PG3773	TcCLB.508781.20	ATPsynthase;putative	ATP synthase, putative	Transmembrane transport	intracellular membrane	TcChr10-S:346068-347492(-)	474	474	19.83	19.83	3.797	1	8	7	0	8	7	0	5.18733e-63	8	7	867355	631759	929763	1.1971e+06	1.02805e+06	1.13248e+06	6.83367e+07	4.96873e+07	7.31011e+07	1.23214e+08	9.86326e+07	1.08325e+08	723905	522473	781554	1.30679e+06	1.0396e+06	1.15239e+06	810985	854986	795701	1.3308e+06	1.16106e+06	1.15239e+06	ATP	synthase	820557	1.21475e+06
PG3173	TcCLB.510257.90	autophagocytosisassociatedprotein;putative	autophagocytosis associated protein, putative	N/A	N/A	TcChr20-S:436270-437082(-)	270	270	30	30	5.926	1	9	5	0	9	5	0	2.2349e-62	9	5	568675	352656	657241	753633	673303	789130	7.67035e+07	4.88178e+07	9.10564e+07	1.04254e+08	9.19151e+07	1.06585e+08	812537	513707	973871	1.10552e+06	968541	1.13388e+06	910278	840641	991499	1.12583e+06	1.0817e+06	1.13388e+06	autophagocytosis	associated	914140	1.1138e+06
PG4213	TcCLB.511871.80	frataxin-like;mitochondrialprecursor;putative	frataxin-like, mitochondrial precursor, putative	oxidation-reduction process	mitochondrion	TcChr15-S:88765-89337(+)	190	190	25.26	25.26	0	1	5	2	0	5	2	0	5.41804e-36	5	2	311222	124489	322780	444363	434327	520412	2.95031e+07	1.38132e+07	3.08559e+07	4.01679e+07	3.7787e+07	4.55752e+07	312533	145116	329937	425897	398249	484843	350128	237471	335909	433722	444779	484843	mitochondrial	precursor	307836	454448
PG4124	TcCLB.508371.10	glutamine-dependentcarbamoyl-phosphatesynthetase(pseudogene);putative;GATase-CPSase(pseudogene);putative;carbamoyl-phosphatesynthase(ammonia)(pseudogene);putative(PYR1A-B)	glutamine-dependent carbamoyl-phosphate synthetase (pseudogene), putative	Metabolism	cytoplasm	TcChr21-S:204157-206052(-)	632	632	5.854	5.854	0	1	3	2	0	3	2	0	6.62197e-20	3	2	192416	130932	239746	255511	293331	316875	2.71673e+07	1.94932e+07	3.42127e+07	3.54117e+07	4.04766e+07	4.36308e+07	287789	205265	365847	375428	426582	464158	322408	335900	372469	382326	476422	464158	glutamine-dependent	carbamoyl-phosphate	343592	440969
PG3721	TcCLB.511911.159	histonedeacetylase1;putative	histone deacetylase 1, putative	chromosome organization	Nucleus	TcChr10-S:64171-65337(-)	388	388	10.31	10.31	0	1	4	3	0	4	3	0	8.26088e-27	4	3	428961	299331	516686	569237	557090	577306	4.39109e+07	3.01301e+07	5.3106e+07	5.94494e+07	5.72202e+07	5.92267e+07	465158	317167	567941	630429	602990	630072	521112	519019	578222	642012	673440	630072	histone	deacetylase	539451	648508
PG4466	TcCLB.508571.10	hypotheticalprotein	hypothetical protein	Unknown function	N/A	TcChr19-S:280167-281552(-)	461	461	17.79	17.79	0	1	3	3	0	3	3	0	2.0754e-28	2	2	228683	210285	343361	510345	497520	594895	2.07734e+07	2.07097e+07	3.30678e+07	5.18188e+07	5.17742e+07	6.23424e+07	220057	217758	353461	549390	545768	663217	246528	356343	359859	559484	609533	663217	hypothetical	protein	320910	610745
PG1031	TcCLB.509551.50	hypotheticalprotein	hypothetical protein	Unknown function	N/A	TcChr39-S:1124878-1128309(-)	1143	1143	1.4	1.4	0	1	2	2	0	2	2	0	1.09085e-15	2	2	428079	264092	513001	604221	633854	663872	3.75751e+07	2.2749e+07	4.38423e+07	4.97101e+07	5.30935e+07	5.58735e+07	398041	239361	468805	527077	559564	594399	445922	391696	477291	536761	624940	594399	hypothetical	protein	438303	585367
PG3701	TcCLB.511181.40	hypotheticalprotein	hypothetical protein	Unknown function	N/A	TcChr38-S:1275210-1276253(+)	347	347	15.85	15.85	0	1	2	2	0	2	2	0	4.66926e-14	2	2	8994.49	5005.44	7212.53	15304.4	17170.5	12793.9	1.7989e+06	1.00109e+06	1.44251e+06	3.06088e+06	3.4341e+06	2.55877e+06	19056.1	10513.7	15405.6	32464.5	36208.5	27221	21348.4	17204.8	15684.5	33061	40438.8	27221	hypothetical	protein	18079.2	33573.6
PG751	TcCLB.511729.20	hypotheticalprotein	hypothetical protein	Unknown function	N/A	TcChr32-S:885764-886639(+)	291	291	12.03	12.03	0	1	3	3	0	3	3	0	3.84525e-14	3	3	103143	90670.2	115250	79734	94947.9	85860.1	1.10379e+07	9.2163e+06	1.23664e+07	9.09077e+06	1.03778e+07	9.8745e+06	116927	97220.1	132286	96393.5	109331	105048	130992	159093	134680	98164.6	122105	105048	hypothetical	protein	141589	108439
PG717	TcCLB.511733.80	hypotheticalprotein	hypothetical protein	structural	myosin complex	TcChr32-S:767822-771172(-)	1116	1116	3.405	3.405	0	1	2	2	0	2	2	0	7.06678e-10	1	1	89501.6	57467.6	97831.1	924196	1.52513e+06	1.10384e+06	1.72141e+06	1.10529e+06	1.88162e+06	1.77753e+07	2.93333e+07	2.12305e+07	18235.3	11285.4	19814.5	188458	309402	225856	20428.8	18467.7	20173.2	191921	345551	225856	hypothetical	protein	19689.9	254443
PG3764	TcCLB.503479.40	hypotheticalprotein;conserved	Flagellum attachment zone protein 6	structural	cilium, cytoskeleton	TcChr10-S:317594-321244(-)	1216	1216	30.67	30.67	2.632	1	16	13	0	16	13	0	4.44193e-131	15	12	1.87064e+06	1.17629e+06	1.95511e+06	2.58201e+06	1.95366e+06	2.39882e+06	2.08343e+08	1.24888e+08	2.17787e+08	2.92925e+08	2.23543e+08	2.7246e+08	2.20702e+06	1.3136e+06	2.32924e+06	3.10653e+06	2.35559e+06	2.89851e+06	2.4725e+06	2.1496e+06	2.37141e+06	3.16361e+06	2.63081e+06	2.89851e+06	hypothetical	protein	2.33117e+06	2.89764e+06
PG3727	TcCLB.504133.45	hypotheticalprotein;conserved	Temperature dependent protein affecting M2 dsRNA replication, putative	nuclease activity	N/A	TcChr10-S:117027-117404(+)	125	125	34.4	34.4	0	1	6	3	0	6	3	0	1.03317e-32	6	3	560987	359015	677229	691395	626668	681041	6.47436e+07	4.52098e+07	8.59909e+07	9.42606e+07	8.51367e+07	9.32458e+07	685843	475792	919713	999590	897096	991977	768344	778596	936361	1.01796e+06	1.00191e+06	991977	hypothetical	protein	827767	1.00395e+06
PG592	TcCLB.505807.140	hypotheticalprotein;conserved	Yip1 domain containing protein, putative	vesicle-mediated transport	membrane	TcChr32-S:123745-124794(-)	349	349	22.35	22.35	7.163	1	8	3	0	8	3	0	7.00049e-34	7	2	43076.9	26512.7	38042.4	63315.5	62062.5	63651.9	8.61538e+06	5.30254e+06	7.60848e+06	1.26631e+07	1.24125e+07	1.27304e+07	91264.6	55768.3	81321.2	134284	130848	135430	102243	91260.5	82793.2	136751	146135	135430	hypothetical	protein	92098.9	139439
PG3888	TcCLB.505965.80	hypotheticalprotein;conserved	hypothetical protein, conserved	Unknown function	N/A	TcChr30-S:389553-390218(-)	221	221	20.81	20.81	0	1	3	2	0	3	2	0	3.98183e-32	3	2	97565.8	67683	91973.9	131400	149366	160991	1.95132e+07	1.35366e+07	1.83948e+07	2.62801e+07	2.98732e+07	3.21982e+07	206707	142504	196609	278618	314911	342534	231572	233197	200168	283737	351703	342534	hypothetical	protein	221646	325991
PG1046	TcCLB.506147.80	hypotheticalprotein;conserved	Present in the outer mitochondrial membrane proteome 6	Unknown function	contractile vacuole, mitochondrial outer membrane	TcChr39-S:1172219-1172725(-)	168	168	13.1	13.1	12.5	1	2	2	0	2	2	0	1.89948e-17	2	2	4898.53	3370.83	5671.29	6470.64	6095.83	7713.78	979707	674166	1.13426e+06	1.29413e+06	1.21917e+06	1.54276e+06	10378.2	7097.49	12130.3	13720.7	12847.6	16412.3	11626.7	11614.5	12349.9	13972.8	14348.7	16412.3	hypothetical	protein	11863.7	14911.2
PG1198	TcCLB.506181.10	hypotheticalprotein;conserved	hypothetical protein, conserved	Unknown function	axoneme	TcChr14-S:87839-89542(-)	567	567	7.231	7.231	0	1	4	2	0	4	2	0	4.85647e-19	4	2	42237.8	21416.7	40660.5	56909.6	47649.2	52481.2	8.44756e+06	4.28334e+06	8.1321e+06	1.13819e+07	9.52985e+06	1.04962e+07	89486.9	45023.2	86959.9	120709	100434	111662	100251	73677	88534	122926	112168	111662	hypothetical	protein	87487.5	115586
PG1626	TcCLB.506203.110	hypotheticalprotein;conserved	hypothetical protein, conserved	Unknown function	cytoplasm	TcChr26-S:484332-485348(-)	338	338	14.2	14.2	0	1	3	3	0	3	3	0	7.74714e-27	3	3	166235	121032	199567	218272	228696	247567	3.1964e+07	2.33485e+07	3.85707e+07	4.22546e+07	4.43522e+07	4.8094e+07	338602	245866	412463	448019	467415	511639	379333	402340	419929	456251	522025	511639	hypothetical	protein	400534	496638
PG432	TcCLB.506359.40	hypotheticalprotein;conserved	hypothetical protein, conserved	Unknown function	cytoplasm	TcChr40-S:894166-897027(+)	953	953	12.59	12.59	0	1	5	4	0	5	4	0	2.05431e-42	5	4	19199.7	11370.4	20683.3	29395.4	29827.8	29499.3	3.83994e+06	2.27409e+06	4.13665e+06	5.87909e+06	5.96555e+06	5.89986e+06	40677.3	23907.2	44222.3	62344.1	62881.1	62764.5	45570.5	39122.2	45022.8	63489.6	70227.8	62764.5	hypothetical	protein	43238.5	65494
PG891	TcCLB.506369.40	hypotheticalprotein;conserved	hypothetical protein, conserved	Unknown function	N/A	TcChr39-S:447670-450495(-)	941	941	5.845	5.845	0	1	2	2	0	2	2	0	6.4971e-12	1	1	131349	98374.9	163014	192171	180387	196290	1.66797e+07	1.24924e+07	2.07007e+07	2.44033e+07	2.29069e+07	2.49265e+07	176691	131508	221377	258777	241400	265175	197946	215202	225384	263532	269604	265175	hypothetical	protein	212844	266104
PG1229	TcCLB.506735.20	hypotheticalprotein;conserved	hypothetical protein, conserved	Unknown function	N/A	TcChr14-S:284207-285118(-)	303	303	25.74	25.74	9.571	1	7	4	0	7	4	0	1.55518e-49	7	4	49121.7	29471.2	59214.9	66415.1	59331.4	71552.5	9.82435e+06	6.0201e+06	1.1843e+07	1.3283e+07	1.18663e+07	1.43105e+07	104071	63274.8	126665	140847	125038	152239	116590	103544	128957	143435	139647	152239	hypothetical	protein	116364	145107
PG1226	TcCLB.506737.40	hypotheticalprotein;conserved	hypothetical protein, conserved	protein binding	N/A	TcChr14-S:252610-256395(-)	1261	1261	4.203	4.203	0	1	4	3	0	4	3	0	6.60916e-24	4	3	50774	35189.7	47769	81026.8	97576.8	98607.8	9.76445e+06	6.72677e+06	9.16822e+06	1.54822e+07	1.85494e+07	1.88453e+07	103437	70760.5	97951.5	164142	195565	200482	115880	115794	99724.5	167158	218414	200482	hypothetical	protein	110466	195351
PG4084	TcCLB.506739.70	hypotheticalprotein;conserved	hypothetical protein, conserved	Unknown function	cilium	TcChr3-S:37919-40183(-)	754	754	20.29	20.29	0	1	13	10	0	13	10	0	4.30734e-97	12	9	865899	567685	905856	1.16535e+06	1.00873e+06	1.19121e+06	1.01697e+08	6.90288e+07	1.07157e+08	1.39167e+08	1.19395e+08	1.41051e+08	1.0773e+06	726572	1.14595e+06	1.47577e+06	1.25823e+06	1.50054e+06	1.20689e+06	1.18898e+06	1.16669e+06	1.50288e+06	1.40524e+06	1.50054e+06	hypothetical	protein	1.18752e+06	1.46956e+06
PG4406	TcCLB.506755.30	hypotheticalprotein;conserved	hypothetical protein, conserved	Unknown function	N/A	TcChr41-S:2271021-2272091(-)	356	356	11.52	11.52	0	1	4	3	0	4	3	0	1.01809e-22	4	3	120846	78598.9	150807	162623	154761	181832	1.12794e+07	7.48513e+06	1.25657e+07	1.56812e+07	1.5303e+07	1.69888e+07	119485	78772.5	134363	166275	161282	180732	133858	128905	136796	169330	180125	180732	hypothetical	protein	133186	176729
PG2301	TcCLB.506779.120	hypotheticalprotein;conserved	hypothetical protein, conserved	Unknown function	contractile vacuole, mitochondrion	TcChr27-S:424783-425415(+)	210	210	9.048	9.048	8.571	1	3	2	0	3	2	0	2.67327e-19	3	2	45268.8	28767.1	41442.6	37648.1	30913.2	32797.1	9.05376e+06	5.75342e+06	8.28852e+06	7.52963e+06	6.18265e+06	6.55941e+06	95908.5	60649.6	88672.5	79858.3	65124.2	69781	107445	99248.3	90277.6	81325.6	72733	69781	hypothetical	protein	98990.5	74613.2
PG471	TcCLB.507625.190	hypotheticalprotein;conserved	hypothetical protein, conserved	Unknown function	N/A	TcChr40-S:1097530-1099119(+)	529	529	13.42	13.42	0	1	4	4	0	4	4	0	3.71081e-31	4	4	146088	114343	177746	201464	182240	249773	1.69838e+07	1.20402e+07	2.18368e+07	2.3105e+07	2.40299e+07	2.72069e+07	179913	126757	233528	244969	253234	289435	201555	207428	237755	249470	282820	289435	hypothetical	protein	215579	273909
PG2147	TcCLB.507677.10	hypotheticalprotein;conserved	hypothetical protein, conserved	Unknown function	N/A	TcChr37-S:964029-966386(+)	785	785	8.025	8.025	0	1	3	3	0	3	3	0	7.10306e-27	3	3	70684.2	48032.4	64531.7	87213.6	85632.1	94864.1	1.41368e+07	9.60648e+06	1.29063e+07	1.74427e+07	1.71264e+07	1.89728e+07	149755	101157	137990	184953	180513	201839	167769	165536	140488	188351	201603	201839	hypothetical	protein	157931	197264
PG2122	TcCLB.507711.180	hypotheticalprotein;conserved	hypothetical protein, conserved	Unknown function	N/A	TcChr37-S:840478-841227(-)	249	249	22.49	22.49	0	1	3	2	0	3	2	0	9.39353e-307	3	2	49831.8	33894	46743.2	61032.3	62503.7	61245.3	9.96635e+06	6.77881e+06	9.34864e+06	1.22065e+07	1.25007e+07	1.22491e+07	105576	71383.9	99951.4	129442	131759	130309	118276	116814	101761	131820	147153	130309	hypothetical	protein	112284	136427
PG2855	TcCLB.507883.60	hypotheticalprotein;conserved	hypothetical protein, conserved	protein binding	ciliary plasm, cytoplasm, nuclear lumen	TcChr36-S:1132368-1133924(-)	518	518	6.564	6.564	0	1	2	2	0	2	2	0	1.18503e-11	2	2	14481.1	11602.1	12904.7	46504.9	71610.1	57180.5	2.89623e+06	2.32041e+06	2.58093e+06	9.30097e+06	1.4322e+07	1.14361e+07	30680.4	24320.2	27471.4	98607.3	151047	121661	34370.9	39798.1	27968.7	100419	168695	121661	hypothetical	protein	34045.9	130258
PG781	TcCLB.507941.50	hypotheticalprotein;conserved	hypothetical protein, conserved	Unknown function	ciliary basal body	TcChr2-S:11591-12286(-)	231	231	18.61	18.61	0	1	2	2	0	2	2	0	4.42661e-29	2	2	47607.7	36245.2	54945.6	64234.6	62119.6	68832.8	9.52154e+06	7.24904e+06	1.09891e+07	1.28469e+07	1.24239e+07	1.37666e+07	100864	76340.4	117516	136224	130930	146453	112997	124925	119644	138727	146227	146453	hypothetical	protein	119188	143802
PG782	TcCLB.507941.70	hypotheticalprotein;conserved	hypothetical protein, conserved	Unknown function	ciliary tip, cilium	TcChr2-S:14622-17183(-)	853	853	5.627	5.627	0	1	4	4	0	4	4	0	5.19674e-34	4	4	308880	234882	345295	442560	432824	454297	4.54267e+07	3.477e+07	5.0575e+07	6.57303e+07	6.26589e+07	6.68814e+07	481215	366074	540781	697019	660389	711504	539101	599052	550570	709825	737545	711504	hypothetical	protein	562908	719625
PG2009	TcCLB.508723.40	hypotheticalprotein;conserved	hypothetical protein, conserved	Unknown function	N/A	TcChr37-S:336788-339298(+)	836	836	5.383	5.383	0	1	3	2	0	3	2	0	6.74366e-21	3	2	25872.2	15333.4	27803.2	35242.5	34038.3	33325.8	5.17443e+06	3.06668e+06	5.56064e+06	7.04849e+06	6.80766e+06	6.66516e+06	54813.9	32259.3	59459	74749.5	71748	70905.9	61407.6	52789.9	60535.2	76122.9	80130.6	70905.9	hypothetical	protein	58244.2	75719.8
PG4496	TcCLB.508973.60	hypotheticalprotein;conserved	hypothetical protein, conserved	Unknown function	N/A	TcChr19-S:435950-437704(+)	584	584	65.07	65.07	6.164	1	26	15	0	26	15	0	6.30356e-158	26	15	844988	544886	844674	1.01001e+06	890215	1.03208e+06	9.03955e+07	5.97589e+07	9.58571e+07	1.22412e+08	1.06032e+08	1.28877e+08	957579	628956	1.02511e+06	1.29804e+06	1.1174e+06	1.37103e+06	1.07277e+06	1.02924e+06	1.04367e+06	1.32189e+06	1.24795e+06	1.37103e+06	hypothetical	protein	1.04856e+06	1.31363e+06
PG1831	TcCLB.509633.20	hypotheticalprotein;conserved	hypothetical protein, conserved	Unknown function	N/A	TcChr34-S:999896-1001353(-)	485	485	30.93	30.93	0	1	10	7	0	10	7	0	3.20741e-77	10	7	816786	515179	891677	1.09182e+06	1.17312e+06	1.12292e+06	5.07071e+07	3.46274e+07	6.18761e+07	6.80956e+07	7.03465e+07	7.22804e+07	537151	364514	661692	722067	741354	768941	601766	596498	673669	735334	827970	768941	hypothetical	protein	623978	777415
PG3089	TcCLB.510289.50	hypotheticalprotein;conserved	hypothetical protein, conserved	Unknown function	N/A	TcChr20-S:84700-86577(-)	625	625	9.12	9.12	0	1	2	2	0	2	2	0	2.17905e-12	2	2	5859.24	3798.39	6902.39	9080.65	7573.08	9646.77	1.17185e+06	759679	1.38048e+06	1.81613e+06	1.51462e+06	1.92935e+06	12413.7	7989.72	14763.2	19257.7	15961.4	20525	13906.9	13074.6	15030.4	19611.6	17826.2	20525	hypothetical	protein	14004	19320.9
PG786	TcCLB.510351.80	hypotheticalprotein;conserved	Pre-mRNA polyadenylation factor FIP1	Nucleic acid biding/ metal ion binding	nucleoplasm	TcChr2-S:46021-46884(-)	287	287	18.12	18.12	11.5	1	5	3	0	5	3	0	4.38433e-28	5	3	383420	233740	388544	494009	426252	495806	6.08479e+07	3.59199e+07	6.1044e+07	7.84611e+07	6.65839e+07	7.92113e+07	644576	377944	652825	832026	701673	842674	722113	618477	664642	847314	783652	842674	hypothetical	protein	668411	824547
PG4610	TcCLB.510615.10	hypotheticalprotein;conserved	hypothetical protein, conserved	Unknown function	mitochondrial matrix	TcChr28-S:147269-148297(+)	342	342	22.51	22.51	0	1	3	3	0	3	3	0	1.00286e-33	3	3	32576.8	17704	32587.2	41065.2	40407.2	50240	6.51535e+06	3.54081e+06	6.51743e+06	8.21303e+06	8.08145e+06	1.0048e+07	69018.6	37245.2	69688.6	87073.7	85173.8	106894	77320.9	60948.8	70950.1	88673.5	95125.1	106894	hypothetical	protein	69739.9	96897.4
PG2385	TcCLB.511529.40	hypotheticalprotein;conserved	SHQ1 protein, putative	Unknown function	N/A	TcChr35-S:145529-147136(-)	535	535	12.71	12.71	0	1	2	2	0	2	2	0	8.20125e-21	2	2	3800.34	3918.67	6111.77	8490.29	10068.8	9374.43	824852	848518	1.22235e+06	1.76284e+06	2.01377e+06	1.93967e+06	8699.41	8894.49	13064.6	18652.8	21228.5	20593.4	9745.87	14555.1	13301.1	18995.5	23708.7	20593.4	hypothetical	protein	12534	21099.2
PG2429	TcCLB.511537.69	hypotheticalprotein;conserved	hypothetical protein, conserved	Unknown function	N/A	TcChr35-S:322234-322977(-)	247	247	26.32	26.32	15.38	1	14	7	0	14	7	0	1.75418e-59	14	7	1.56087e+06	1.32036e+06	1.57398e+06	1.36483e+06	1.05684e+06	1.10238e+06	7.78337e+07	5.40514e+07	7.7929e+07	6.67688e+07	5.96551e+07	5.85178e+07	824509	569871	833684	708137	628394	622530	923691	932549	848775	721148	701812	622530	hypothetical	protein	901672	681830
PG60	TcCLB.511621.100	hypotheticalprotein;conserved	hypothetical protein, conserved	structural	ciliary pocket	TcChr23-S:430554-431606(-)	350	350	13.43	13.43	0	1	2	2	0	2	2	0	1.24511e-14	2	2	404385	270728	482766	514962	549424	573601	6.96211e+06	4.514e+06	7.85265e+06	8.73484e+06	9.26584e+06	9.97886e+06	73751.1	47520.9	83970.9	92613.8	97652.4	106158	82622.8	77764.2	85490.9	94315.5	109062	106158	hypothetical	protein	81959.3	103178
PG651	TcCLB.511751.220	hypotheticalprotein;conserved	ATPase family associated with various cellular activities (AAA), putative	ATP binding	N/A	TcChr32-S:452385-453947(+)	520	520	6.731	6.731	0	1	3	3	0	3	3	0	3.99387e-15	3	3	57174.6	42763.8	73900	94807.6	115676	102580	1.14349e+07	8.55275e+06	1.478e+07	1.89615e+07	2.31352e+07	2.0516e+07	121133	89984.6	157983	201058	243875	218255	135704	147253	160843	204753	272368	218255	hypothetical	protein	147933	231792
PG3726	TcCLB.509247.60	hypotheticalprotein;conserved(pseudogene)	Temperature dependent protein affecting M2 dsRNA replication, putative	Unknown function	N/A	TcChr10-S:115710-116924(+)	404	404	10.64	10.64	8.663	1	3	2	0	3	2	0	8.97858e-24	2	1	23350	13224.2	21714.8	31803.9	33744.3	33138.6	4.67e+06	2.64483e+06	4.34295e+06	6.36079e+06	6.74887e+06	6.62772e+06	49470.4	27815.4	46422.2	67449.4	71141.6	70507.7	55421.2	45517.8	47262.6	68688.7	79453.4	70507.7	hypothetical	protein	49400.5	72883.3
PG470	TcCLB.507627.9	kinesin;putative	kinesin, putative	structural	cytoplasm	TcChr40-S:1091389-1094145(+)	919	919	9.14	9.14	0	1	6	5	0	6	5	0	7.41087e-34	6	5	132706	73165.3	129194	187893	178871	203937	2.33527e+07	1.25884e+07	2.23774e+07	3.10632e+07	2.70087e+07	3.23979e+07	247380	132373	239282	329393	284649	344658	277138	216618	243613	335445	317906	344658			245790	332670
PG2014	TcCLB.511039.10	kinetoplastDNA-associatedprotein;putative	kinetoplast DNA-associated protein, putative	Nucleic acid biding	N/A	TcChr37-S:357366-357923(+)	185	185	24.32	24.32	9.73	1	9	4	0	9	4	0	1.52026e-55	9	4	4.52688e+06	2.87226e+06	4.28045e+06	3.593e+06	3.69875e+06	3.38291e+06	2.27706e+08	1.62722e+08	2.26724e+08	1.88223e+08	1.87911e+08	1.7309e+08	2.41215e+06	1.71588e+06	2.42533e+06	1.99617e+06	1.97963e+06	1.84138e+06	2.70231e+06	2.80791e+06	2.46924e+06	2.03284e+06	2.21092e+06	1.84138e+06	kinetoplast	DNA-associated	2.65982e+06	2.02838e+06
PG3010	TcCLB.509475.10	mitogen-activatedproteinkinase3;putative	mitogen-activated protein kinase 3, putative	protein phosphorylation/dephosphorylation		TcChr12-S:199621-200250(+)	209	209	55.98	55.98	6.699	1	11	6	0	11	6	0	2.97133e-64	11	6	609756	440554	670578	868855	874422	904899	9.64411e+07	6.90477e+07	1.05071e+08	1.32259e+08	1.29813e+08	1.36501e+08	1.02162e+06	726926	1.1235e+06	1.40248e+06	1.36815e+06	1.45214e+06	1.14451e+06	1.18956e+06	1.14383e+06	1.42825e+06	1.528e+06	1.45214e+06	mitogen-activated	protein	1.1593e+06	1.46946e+06
PG167	TcCLB.506515.20	O-sialoglycoproteinendopeptidase;putative;metallo-peptidase;ClanMK;FamilyM67;putative	metallo-peptidase, Clan MK, Family M67, putative	peptidase	N/A	TcChr17-S:529786-530907(-)	373	373	18.23	18.23	0	1	4	4	0	4	4	0	1.67606e-36	4	4	203479	117121	201548	254395	233744	247372	1.67144e+07	1.05842e+07	1.67839e+07	2.10665e+07	2.05938e+07	2.10126e+07	177059	111412	179467	223399	217045	223538	198358	182317	182716	227503	242404	223538	O-sialoglycoprotein	endopeptidase	187797	231148
PG4620	TcCLB.508387.90	paraflagellarrodprotein;putative	paraflagellar rod protein, putative	structural	motile cilium	TcChr28-S:177300-179069(+)	589	589	19.86	19.86	2.037	1	14	9	0	14	9	0	2.04822e-94	14	9	1.884e+06	1.54111e+06	2.29018e+06	2.6551e+06	2.2471e+06	2.38706e+06	1.59781e+08	1.24601e+08	2.06561e+08	2.46902e+08	2.22747e+08	2.30576e+08	1.69259e+06	1.3116e+06	2.20906e+06	2.61844e+06	2.34732e+06	2.45294e+06	1.8962e+06	2.14633e+06	2.24905e+06	2.66655e+06	2.62157e+06	2.45294e+06	paraflagellar	rod	2.09719e+06	2.58035e+06
PG1273	TcCLB.507099.50	programmedcelldeath6protein-like;putative	programmed cell death 6 protein-like, putative	calcium ion binding	N/A	TcChr14-S:494771-495403(-)	210	210	25.24	25.24	0	1	9	2	0	9	2	0	3.75767e-26	9	2	166113	135021	199741	215156	220437	258536	2.65745e+07	2.14486e+07	3.13597e+07	3.5422e+07	3.64544e+07	4.2738e+07	281510	225935	335345	375547	384187	454659	315373	369725	341416	382447	429073	454659	programmed	cell	342171	422060
PG3795	TcCLB.506869.60	proteinkinase;putative	protein kinase PK4, putative	protein phosphorylation/dephosphorylation	cytoplasm	TcChr10-S:431795-433609(-)	604	604	10.1	10.1	0	1	4	4	0	4	4	0	1.93381e-26	4	4	503136	304734	505969	591046	649561	624471	5.63074e+07	3.31845e+07	6.03623e+07	7.0641e+07	8.02502e+07	7.81796e+07	596476	349204	645372	749022	845840	831698	668227	571445	657054	762784	944663	831698	protein	kinase	632242	846382
PG1725	TcCLB.504057.110	ribosomalRNAprocessingprotein6;putative;exosomecomplexexonuclease;putative(RRP6)	ribosomal RNA processing protein 6, putative	nucleic acid binding	intracellular, nuclear exosome (RNase complex)	TcChr34-S:427003-429309(-)	768	768	3.906	3.906	0	1	2	2	0	2	2	0	1.04906e-14	2	2	28281.4	18936.5	23639.4	45447.5	64937.7	53664.8	5.65628e+06	3.7873e+06	4.72787e+06	9.08951e+06	1.29875e+07	1.0733e+07	59918.2	39831.2	50473	96370.4	136946	114180	67125.9	65180.6	51386.6	98141.1	152946	114180	ribosomal	RNA	61231	121756
PG2979	TcCLB.510077.40	smallGTP-bindingproteinRAB6;putative	small GTP-binding protein RAB6, putative	GTP binding	Golgi apparatus	TcChr1-S:46639-47184(+)	181	181	14.36	14.36	0	1	3	2	0	3	2	0	4.33124e-17	3	2	55995.5	34641.9	45763.9	204489	324469	216284	1.0248e+07	6.36375e+06	8.30081e+06	3.09791e+07	4.7375e+07	3.2187e+07	108559	66575.6	88338.9	328502	499643	342415	121618	108946	89937.9	334537	558019	342415	small	GTP-binding	106834	411657
PG669	TcCLB.509171.90	splicingfactor3a;putative	splicing factor 3a, putative	nucleic acid binding	nucleus	TcChr32-S:518604-520217(+)	537	537	12.29	12.29	0	1	4	4	0	4	4	0	1.80451e-28	4	4	32618.4	21126.9	30281.3	44261.9	51743.1	54462.2	6.52369e+06	4.22537e+06	6.05627e+06	8.85239e+06	1.03486e+07	1.08924e+07	69106.8	44467.3	64725.5	93851.4	109094	115877	77419.8	72767.2	65897.1	95575.8	121840	115877	splicing	factor	72028	111098
PG803	TcCLB.506717.130	trans-sialidase(pseudogene);putative	trans-sialidase (pseudogene), putative	pathogenicity	N/A	TcChr2-S:121922-124228(+)	768	768	3.516	3.516	0	1	4	2	0	4	2	0	2.05228e-16	4	2	395673	256341	474398	522156	466419	573511	4.65482e+07	3.01312e+07	5.22892e+07	6.09765e+07	5.61102e+07	6.54915e+07	493095	317144	559208	646569	591290	696718	552410	518982	569331	658449	660373	696718			546908	671846
PG4367	TcCLB.510377.500	trans-sialidase(pseudogene);putative	trans-sialidase (pseudogene), putative	pathogenicity	N/A	TcChr41-S:1714289-1715707(-)	473	473	9.091	3.171	0	1	4	3	2	4	3	2	1.82616e-36	1	1	46404.4	34619.5	63090.4	79367.6	76702.9	87495.1	9.28088e+06	6.9239e+06	1.26181e+07	1.58735e+07	1.53406e+07	1.7499e+07	98314.4	72835.5	134924	168311	161678	186160	110141	119190	137366	171404	180568	186160			122232	179377
PG4364	TcCLB.506765.40	trans-sialidase;GroupII;putative	trans-sialidase, Group II, putative	pathogenicity	N/A	TcChr41-S:1703299-1705791(-)	830	830	9.398	2.651	0	1	8	5	4	8	5	4	3.71861e-41	1	1	837.869	462.8	2346.83	3478.16	2328.03	3201.37	167574	92560.1	469366	695633	465606	640275	1775.15	962.839	5020.08	7377.4	4906.16	6811.43	1988.68	1575.61	5110.96	7512.95	5479.37	6811.43	Group	II	2891.75	6601.25
PG3754	TcCLB.511129.40	trans-sialidase;GroupIII;putative	trans-sialidase, Group III, putative	pathogenicity	N/A	TcChr10-S:252150-255272(-)	1040	1040	6.25	2.885	0	1	6	4	3	6	4	3	7.04926e-36	1	1	10845.2	6666.25	9730.05	12476.2	12909.1	13140.3	2.16903e+06	1.33325e+06	1.94601e+06	2.49523e+06	2.58181e+06	2.62807e+06	22977	14037.6	20806.1	26459	27212.4	27958.2	25741	22971.5	21182.7	26945.1	30391.7	27958.2	Group	III	23298.4	28431.7
PG1880	TcCLB.506965.170	trans-sialidase;GroupV;putative	trans-sialidase, Group V, putative	pathogenicity	N/A	TcChr18-S:421607-423886(-)	759	759	6.192	4.48	0	1	5	3	1	5	3	1	4.43133e-28	4	2	140834	115678	193065	569577	986167	781085	2.81668e+07	2.31355e+07	3.8613e+07	1.13915e+08	1.97233e+08	1.56217e+08	298377	242009	411188	1.20753e+06	2.08009e+06	1.66188e+06	334269	396029	418631	1.22971e+06	2.32311e+06	1.66188e+06	Group	V	382976	1.73824e+06
PG4422	TcCLB.435601.10	trans-sialidase;putative(fragment)	trans-sialidase, putative (fragment)	pathogenicity	N/A	TcChr41-S:2325364-2326647(+)	428	428	19.86	1.636	0	1	10	6	5	10	6	5	4.54877e-56	1	1	162973	103940	178569	210661	245225	270980	4.02818e+06	2.56907e+06	4.41368e+06	5.20688e+06	6.06121e+06	6.69779e+06	42671.4	27040.5	47187.3	55199.1	63887	71253.1	47804.4	44249.7	48041.5	56213.3	71351.2	71253.1			46698.5	66272.6
PG3907	TcCLB.511805.20	Trichohyalin;putative	Trichohyalin, putative	N/A	cytoplasm	TcChr30-S:536027-538093(+)	688	688	21.22	21.22	7.994	1	11	5	0	11	5	0	2.28547e-27	11	5	1.47361e+06	949013	1.427e+06	1.31655e+06	1.05833e+06	1.24589e+06	1.15978e+08	7.33238e+07	1.02523e+08	9.59602e+07	7.98535e+07	9.30814e+07	1.22858e+06	772942	1.09677e+06	1.01763e+06	841180	990227	1.37637e+06	1.26486e+06	1.11663e+06	1.03633e+06	939459	990227			1.25262e+06	988673
PG2560	TcCLB.508605.20	UDP-GalorUDP-GlcNAc-dependentglycosyltransferase;putative	UDP-Gal or UDP-GlcNAc-dependent glycosyltransferase, putative	Metabolism	N/A	TcChr35-S:1122905-1124038(+)	377	377	20.69	9.284	0	1	7	5	3	7	5	3	2.84572e-42	2	2	68193.3	52522.4	73612.6	98684.8	84684	102938	7.70787e+06	5.95126e+06	8.24785e+06	1.10984e+07	9.48792e+06	1.15573e+07	81651.2	62660.9	88199.6	117687	99990.5	122950	91473.1	102540	89796.2	119849	111673	122950	UDP-Gal	or	94603	118157
PG689	TcCLB.506941.159	zincfingerprotein;putative	zinc finger protein, putative	metal ion binding	cilium	TcChr32-S:657054-658751(-)	565	565	9.381	9.381	0	1	2	2	0	2	2	0	5.23064e-12	2	2	4852.11	3084.13	6538.72	7969.49	8010.14	7035.97	1.02516e+06	671563	1.30774e+06	1.5939e+06	1.60203e+06	1.46193e+06	10827.3	7034.58	13983.5	16904.5	16884.3	15517.5	12129.7	11511.5	14236.6	17215.1	18857	15517.5	zinc	finger	12625.9	17196.5
PG1378	TcCLB.509819.49	zinc-bindingphosphatase;putative(fragment)	Myotubularin-related protein, putative (fragment)	protein phosphorylation/dephosphorylation	N/A	TcChr16-S:492235-494220(-)	662	662	10.73	4.985	0	1	3	3	2	3	3	2	7.66774e-22	1	1	2006.83	1622.04	2177.59	3432.42	3838.37	3350.25	401367	324407	435519	686483	767674	670050	4251.77	3413.86	4654.28	7279.94	8092.92	7128.19	4763.22	5586.52	4738.53	7413.7	9038.45	7128.19	zinc-binding	phosphatase	5029.42	7860.11
N/A = Not available
[truncated: 4 more columns]
