# Supplementary material for: Reprogramming of Trypanosoma cruzi metabolism triggered by parasite interaction with the host cell extracellular matrix
Source: PLoS Negl Trop Dis. 2019 Feb 6;13(2):e0007103. doi: 10.1371/journal.pntd.0007103 (PMC6380580; doi:10.1371/journal.pntd.0007103)
Supplement: S2 Table — Phosphopeptides identified with significant differences between Ty and MTy extracts (T-Student Test, p < 0.05 for TMT normalized quantification (PCN manual values)). p-Scores represent the confidence of protein identification by the software. Only p-score < e-7. Residues of S, R and Y represented in lower case correspond to the phosphorylation sites. (XLSX) [file pntd.0007103.s006.xlsx]

## Sheet: Phosphoproteome_Ty ECM
Spectrum number	Filename/id	Peptide	E-value	Mass	gi	Accession	Start	Stop	Defline	Protein Name	Product Description	General Fuction	sub-cellular localization	Chromossome location	Length	Mods	Charge	Theo Mass	P-value	NIST score	Precursor Isolation m/z (Th)	Precursor Theoretical m/z (Th)	Precursor Isotope Selected	Adjusted Precursor m/z (Th)	Precursor Mass Error (ppm)	Adjusted Precursor Mass Error (ppm)	Precursor Purity (%)	(TMT 126C NL)	(TMT 127N NL)	(TMT 128C NL)	(TMT 129N NL)	(TMT 130C NL)	(TMT 131N NL)	(TMT 126C dNL)	(TMT 127N dNL)	(TMT 128C dNL)	(TMT 129N dNL)	(TMT 130C dNL)	(TMT 131N dNL)	(TMT 126C PC)	(TMT 127N PC)	(TMT 128C PC)	(TMT 129N PC)	(TMT 130C PC)	(TMT 131N PC)	(TMT 126C PCN) manual	(TMT 127N PCN) manual	(TMT 128C PCN) manual	(TMT 129N PCN) manual
16491	EM-3rep-phosp-Frac10.FTMS.HCD.16491.16491.4.RT_70.032_min_4201.9_s.dta	vAAGsGNAENGQLQHVTLVDKQPLR	5.21908e-08	3139.65	0	BL_ORD_ID:2304	43	67	TcCLB.437545.10	3-oxo-5-alpha-steroid 4-dehydrogenase; putative;3-oxo-5-alpha-steroid 4-dehydrogenase (pseudogene); putative	3-oxo-5-alpha-steroid 4-dehydrogenase, putative	oxidation-reduction process	cytoplasm, glycosome, mitochondrial inner membrane	TcChr40-S:1808714-1809616(-)	300	TMT 6-plex on n-term peptide:1,phosphorylation of S:5,TMT 6-plex on K:21	4	3139.65	2.88236e-12	0	786.172	785.921	1	785.921	-0.0634224	-1.35583	0	21342.4	17067.9	23267.9	20244.6	18147.1	16283.9	4.26849e+06	3.41359e+06	4.65358e+06	4.04892e+06	3.62941e+06	3.25678e+06	45217	35993.6	49783.2	42945.4	38232.4	34646.6	50656.2	58900.8	50684.4	43734.5
14912	EM-3rep-phosp-Frac9.FTMS.HCD.14912.14912.3.RT_63.834_min_3830.1_s.dta	vVRsHAAPLNEVTQEDLK	0.00938095	2543.35	0	BL_ORD_ID:11384	11	28	TcCLB.506699.34	6-phospho-1-fructokinase (pseudogene); putative	ATP-dependent 6-phosphofructokinase, glycosomal (pseudogene)	glycolytic process	glycosome	TcChr36-S:651580-653037(+)	486	TMT 6-plex on n-term peptide:1,phosphorylation of S:4,TMT 6-plex on K:18	3	2543.35	6.61142e-07	0	849.125	848.791	1	848.79	-0.78564	-1.79615	89.0144	7244.45	5228	8217.64	7291.55	4636.62	5237.44	1.44889e+06	1.0456e+06	1.64353e+06	1.45831e+06	927325	1.04749e+06	15348.4	11020.2	17586.2	15469.2	9763.36	11143.5	17194.7	18033.6	17904.5	15753.4
29661	EM-3rep-phosp-Frac10.FTMS.HCD.29661.29661.4.RT_123.553_min_7413.2_s.dta	sVLSSSQsSRPSATDSTLNVLTPLLDNYTIPITR	6.49909e-08	3942.02	0	BL_ORD_ID:19706	139	172	TcCLB.508569.130	6-phosphofructo-2-kinase/fructose-2;6-biphosphatase; putative	6-phosphofructo-2-kinase/fructose-2,6-biphosphatase, putative	fructose metabolic process	N/A	TcChr19-S:275057-277306(-)	749	TMT 6-plex on n-term peptide:1,phosphorylation of S:8	4	3942.02	2.37011e-12	0	986.764	986.512	1	986.513	1.37665	0.0842486	NaN	9370.23	5877.9	8618.31	8182.56	6777.26	6767.86	1.87405e+06	1.17558e+06	1.72366e+06	1.63651e+06	1.35545e+06	1.35357e+06	19852.2	12390.2	18439.3	17357.4	14278.6	14399.7	22240.2	20275.5	18773.1	17676.4
28045	EM-3rep-phosp-Frac9.FTMS.HCD.28045.28045.4.RT_116.581_min_6994.8_s.dta	rIEYLTEVYSTLSStCQSPGGPSDDEVTLGDVSR	5.49119e-10	4094.89	0	BL_ORD_ID:19706	427	460	TcCLB.508569.130	6-phosphofructo-2-kinase/fructose-2;6-biphosphatase; putative	6-phosphofructo-2-kinase/fructose-2,6-biphosphatase, putative	fructose metabolic process	N/A	TcChr19-S:275057-277306(-)	749	TMT 6-plex on n-term peptide:1,phosphorylation of T:15,NEM C:16	4	4094.89	2.50739e-14	0	1025.23	1024.73	2	1024.73	2.02193	1.01142	NaN	11068.4	8920.42	13857.6	9991.61	9350.15	9490.08	2.21368e+06	1.78408e+06	2.77151e+06	1.99832e+06	1.87003e+06	1.89802e+06	23450	18814.4	29652.5	21192.2	19694.8	20191.7	26270.9	30788.3	30189.2	21581.5
29749	EM-3rep-phosp-Frac9.FTMS.HCD.29749.29749.4.RT_123.505_min_7410.3_s.dta	sVLSsSQSSRPSATDSTLNVLTPLLDNYTIPITR	0.305179	3942	0	BL_ORD_ID:19706	139	172	TcCLB.508569.130	6-phosphofructo-2-kinase/fructose-2;6-biphosphatase; putative	6-phosphofructo-2-kinase/fructose-2,6-biphosphatase, putative	fructose metabolic process	N/A	TcChr19-S:275057-277306(-)	749	TMT 6-plex on n-term peptide:1,phosphorylation of S:5	4	3942.02	1.06006e-05	0	986.76	986.512	1	986.509	-2.95865	-3.96916	NaN	7406.46	6561.51	8256.14	6026.31	4822.27	6908.72	1.48129e+06	1.3123e+06	1.65123e+06	1.20526e+06	964454	1.38174e+06	15691.6	13845.1	17668.2	12779.1	10154.9	14699.4	17579.2	22656.4	17988	13013.9
31973	EM-3rep-phosp-Frac8.FTMS.HCD.31973.31973.2.RT_132.578_min_7954.7_s.dta	sSSVDyTQDTPLFALSPVDGR	0.0377456	2376.05	0	BL_ORD_ID:10766	2	22	TcCLB.503855.30	adenylosuccinate lyase; putative (ADSL)	adenylosuccinate lyase, putative	purine ribonucleotide biosynthetic process	cytoplasm, nucleoplasm	TcChr8-S:146790-148178(-)	462	acetylation of protein n-term:1,phosphorylation of Y:6	2	2376.05	1.53375e-06	0	1189.54	1189.03	1	1189.03	0.166917	-0.580658	NaN	1059.12	0	783.919	1237.86	1999.54	2041.16	211824	74189.8	156784	247572	399907	408232	2243.9	741.898	1674.11	2623.54	4216.66	4342.9	2513.83	1214.06	1704.42	2671.75
29012	EM-3rep-phosp-Frac7.FTMS.HCD.29012.29012.3.RT_121.857_min_7311.4_s.dta	gFSCQPVEGAmyAFPTIELPEK	1.05986e-06	3092.46	0	BL_ORD_ID:6120	397	418	TcCLB.506529.430	alanine aminotransferase; putative;glutamic--alanine transaminase; putative;glutamic--pyruvic transaminase; putative	glutamic--pyruvic transaminase, putative	biosynthetic process	ciliary plasm, cytoplasm	TcChr6-S:128069-129562(-)	497	TMT 6-plex on n-term peptide:1,NEM C:4,oxidation of M:11,phosphorylation of Y:12,TMT 6-plex on K:22	3	3092.47	3.07295e-11	0	1032.16	1031.83	1	1031.83	0.325212	-0.466289	NaN	8994.83	6167.59	8261.11	7736.27	6345.89	7712.75	1.79897e+06	1.23352e+06	1.65222e+06	1.54725e+06	1.26918e+06	1.54255e+06	19056.8	13004.6	17675.4	16407.8	13369.3	16410.1	21349.2	21281	17995.4	16709.3
18099	EM-3rep-phosp-Frac6.FTMS.HCD.18099.18099.3.RT_79.255_min_4755.3_s.dta	tITVVSHLGEPLsPR	0.00698539	1914.01	0	BL_ORD_ID:4830	133	147	TcCLB.506179.59	ATP-dependent RNA helicase; putative (fragment)	ATP-dependent RNA helicase, putative (fragment)	ATP-dependent RNA helicase	N/A	TcChr14-S:97278-98330(-)	351	TMT 6-plex on n-term peptide:1,phosphorylation of S:13	3	1914.02	9.57034e-07	0	639.347	639.013	1	639.013	-0.426582	-1.23644	4.03265	23278.5	17668	23382.2	16324.7	18868.1	22212.6	1.95051e+06	1.48041e+06	1.9592e+06	1.36785e+06	1.58096e+06	1.86121e+06	20662.2	15618.5	20958.6	14499.7	16654.7	19800.1	23147.7	25558.4	21338	14766.1
21630	EM-3rep-phosp-Frac9.FTMS.HCD.21630.21630.3.RT_90.563_min_5433.8_s.dta	vQASmQSHCFVVSGPYDVKEAsEIAQ	0.0282709	3488.63	0	BL_ORD_ID:7648	106	131	TcCLB.504017.10	basic transcription factor 3a; putative	transcription factor BTF3, putative	transcription factor	cytoplasm	TcChr18-S:151262-151657(-)	131	TMT 6-plex on n-term peptide:1,oxidation of M:5,NEM C:9,TMT 6-plex on K:19,phosphorylation of S:22	3	3488.64	7.74715e-07	0	1164.22	1163.89	1	1163.89	-0.539126	-1.54964	NaN	7147.06	6939.78	8918.61	6032.23	5989.5	4179.33	1.42941e+06	1.38796e+06	1.78372e+06	1.20645e+06	1.1979e+06	835866	15142.1	14644.8	19084.2	12797.8	12616	8892.19	16963.5	23965	19429.6	13033
31274	EM-3rep-phosp-Frac9.FTMS.HCD.31274.31274.3.RT_129.725_min_7783.5_s.dta	aDQLsnEQISEFKEAFSLFDKDGDGTITTK	0.000491561	4144.05	0	BL_ORD_ID:18240	2	31	TcCLB.507483.39	calmodulin (CALA2)	calmodulin	calcium ion binding	contractile vacuole, cytosol	TcChr41-S:549733-550182(-)	149	acetylation of protein n-term:1,phosphorylation of S:5,deamidation of N and Q:6,TMT 6-plex on K:13,TMT 6-plex on K:21,TMT 6-plex on K:30	3	4144.04	1.14051e-08	0	1382.7	1382.35	1	1382.36	6.6789	5.66839	100	44463.2	27940.2	41387.3	38069.6	27337.2	28190.3	8.89264e+06	5.58803e+06	8.27746e+06	7.61391e+06	5.46744e+06	5.63806e+06	94201.6	58899.4	88562.2	80763.4	57580	59979.4	105533	96384.2	90165.3	82247.3
25161	EM-3rep-phosp-Frac7.FTMS.HCD.25161.25161.3.RT_106.196_min_6371.8_s.dta	eLPLDDDsDFVAMEQER	0.000522897	2317	0	BL_ORD_ID:3548	50	66	TcCLB.511441.10	calpain cysteine peptidase; putative;cysteine peptidase; Clan CA; family C2; putative	cysteine peptidase, Clan CA, family C2, putative	proteolysis	cilium, contractile vacuole, cytoplasm	TcChr39-S:259237-263064(+)	1275	TMT 6-plex on n-term peptide:1,phosphorylation of S:8	3	2317	4.11892e-08	0	773.342	773.341	0	773.342	0.178895	-0.612606	NaN	4251.4	2585.74	3612.47	3144.09	2569.3	2873.93	850280	517147	722494	628818	513860	574785	9007.21	5452.58	7729.69	6668.86	5412.31	6114.74	10090.7	8922.72	7869.61	6791.39
17869	EM-3rep-phosp-Frac11.FTMS.HCD.17869.17869.4.RT_76.292_min_4577.5_s.dta	aEADNQPEFCDqEVQEPRPHTPEEEyPAEEPNTYPEEEPR	0.00892526	5160.17	0	BL_ORD_ID:8292	57	96	TcCLB.510957.9	calpain-like cysteine peptidase; putative	calpain-like cysteine peptidase, putative	proteolysis	N/A	TcChr9-S:439745-440791(+)	349	TMT 6-plex on n-term peptide:1,NEM C:10,deamidation of N and Q:12,phosphorylation of Y:26	4	5160.17	4.25418e-06	0	1291.56	1291.05	2	1291.06	7.14262	6.06271	0	12969.5	7993.11	11781.3	19427.4	24908.4	17790	2.5939e+06	1.59862e+06	2.35627e+06	3.88549e+06	4.98169e+06	3.558e+06	27477.7	16811.6	25171.5	41207.1	52522.9	37851	30783.1	27510.9	25627.1	41964.2
31323	EM-3rep-phosp-Frac10.FTMS.HCD.31323.31323.3.RT_130.368_min_7822.1_s.dta	stGDVNSAGDILDGFFSHPSLPYNPSVGEGGDSLTK	0.00432985	3987.83	0	BL_ORD_ID:15096	2	37	TcCLB.508541.190	cell cycle sequence binding phosphoprotein (RBP33); putative	cell cycle sequence binding phosphoprotein (RBP33), putative	N/A	cytoplasm	TcChr38-S:327288-329309(+)	673	acetylation of protein n-term:1,phosphorylation of T:2,TMT 6-plex on K:36	3	3987.82	1.4257e-07	0	1330.96	1330.28	2	1330.29	3.00539	1.71299	NaN	38975.6	19776.2	35049	46406.8	41616.4	50856.1	7.79513e+06	3.95524e+06	7.0098e+06	9.28136e+06	8.32328e+06	1.01712e+07	82575.5	41602.1	74957.5	98413.3	87719.2	108205	92508.6	68078.6	76314.3	100222
22400	EM-3rep-phosp-Frac5.FTMS.HCD.22400.22400.3.RT_97.496_min_5849.7_s.dta	lVAVLQSELEAsQHEK	0.000687685	2318.23	0	BL_ORD_ID:9330	168	183	TcCLB.504149.124	conserved protein; unknown function	conserved protein, unknown function	Unknown function	cytoplasm	TcChr27-S:40936-41508(-)	190	TMT 6-plex on n-term peptide:1,phosphorylation of S:12,TMT 6-plex on K:16	3	2318.23	5.47041e-08	0	773.751	773.75	0	773.751	1.35571	0.422403	NaN	98827.7	64142	130340	158176	125235	146366	1.97655e+07	1.28284e+07	2.60679e+07	3.16351e+07	2.5047e+07	2.92732e+07	209381	134897	278817	335499	263914	311417	234568	220749	283864	341663
20559	EM-3rep-phosp-Frac5.FTMS.HCD.20559.20559.3.RT_90.348_min_5420.9_s.dta	lFSIVHAPEEPsTPVK	0.00872257	2288.22	0	BL_ORD_ID:9066	741	756	TcCLB.507677.150	CYC2-like cyclin; putative;G1 cyclin CycE4; putative	G1 cyclin CycE4, putative	protein kinase binding	cytoplasm	TcChr37-S:928733-931858(+)	1041	TMT 6-plex on n-term peptide:1,phosphorylation of S:12,TMT 6-plex on K:16	3	2288.22	7.48397e-07	0	764.083	763.748	1	763.749	0.819141	-0.114167	0	42872.8	19709.3	34964.9	86418.2	142899	103669	5.4135e+06	2.48867e+06	4.41498e+06	1.09119e+07	1.80437e+07	1.30902e+07	57346.4	26062.7	47065.9	115690	190285	139257	64244.7	42649.6	47917.9	117816
19179	EM-3rep-phosp-Frac8.FTMS.HCD.19179.19179.3.RT_80.804_min_4848.2_s.dta	eSPNEsMFTVENK	0.521882	2048.95	0	BL_ORD_ID:6510	44	56	TcCLB.506801.80	cysteine peptidase inhibitor;chagasin (CHA)	cysteine peptidase inhibitor	proteolysis	N/A	TcChr26-S:256181-256513(+)	110	TMT 6-plex on n-term peptide:1,phosphorylation of S:6,TMT 6-plex on K:13	3	2048.95	4.23709e-05	0	683.992	683.992	0	683.992	0.584777	-0.162798	0	28448	22161.7	32502.5	27058	17201.8	25205.4	5.68959e+06	4.43234e+06	6.5005e+06	5.4116e+06	3.44036e+06	5.04108e+06	60271.1	46732.1	69559.7	57391	36217.3	53628.6	67521.2	76473.5	70818.9	58445.5
9844	EM-3rep-phosp-Frac10.FTMS.HCD.9844.9844.4.RT_43.236_min_2594.2_s.dta	kLSRHDEyPQEESPK	0.269792	2609.35	0	BL_ORD_ID:14212	766	780	TcCLB.508555.60	cytoskeleton-associated protein CAP5.5; putative;cysteine peptidase; Clan CA; family C2; putative	cytoskeleton-associated protein CAP5.5, putative	proteolysis	ciliary basal body, ciliary pocket, contractile vacuole, cortical cytoskeleton, subpellicular network	TcChr31-S:806208-808628(+)	806	TMT 6-plex on K | TMT 6-plex on n-term peptide:1,phosphorylation of Y:8,TMT 6-plex on K:15	4	2609.35	1.66026e-05	0	653.345	653.344	0	653.345	1.20741	-0.0849904	0	20883.6	14229.6	19597.7	19432.1	13943.4	14164	4.17671e+06	2.84591e+06	3.91953e+06	3.88643e+06	2.78869e+06	2.8328e+06	44244.8	29996.5	41933.6	41225.2	29372.3	30136.2	49567.1	49086.9	42692.6	41982.7
25434	EM-3rep-phosp-Frac10.FTMS.HCD.25434.25434.3.RT_106.285_min_6377.1_s.dta	tsYTEEDLAKEPPPTTSGEYFGVSLQEFDR	6.36276e-05	3930.85	0	BL_ORD_ID:5168	86	115	TcCLB.509585.10	dynein heavy chain; putative	dynein heavy chain, putative	structural	axoneme, contractile vacuole	TcChr14-S:549849-560969(-)	3706	TMT 6-plex on n-term peptide:1,phosphorylation of S:2,TMT 6-plex on K:10	3	3930.85	1.65783e-09	0	1311.63	1311.29	1	1311.29	1.12514	-0.167265	NaN	36222.5	25759.8	43398.1	48431.6	61284.4	64060.1	7.24449e+06	5.15196e+06	8.67962e+06	9.68633e+06	1.22569e+07	1.2812e+07	76742.5	54243.4	92791.3	102683	129194	136298	85974	88765.1	94470.9	104569
20611	EM-3rep-phosp-Frac7.FTMS.HCD.20611.20611.3.RT_87.895_min_5273.7_s.dta	tSLPLCQSLsSPSMRPR	0.00021779	2293.11	0	BL_ORD_ID:5168	442	458	TcCLB.509585.10	dynein heavy chain; putative	dynein heavy chain, putative	structural	axoneme, contractile vacuole	TcChr14-S:549849-560969(-)	3706	TMT 6-plex on n-term peptide:1,NEM C:6,phosphorylation of S:10	3	2293.12	1.18538e-08	0	765.714	765.379	1	765.379	-0.259472	-1.05097	NaN	22430.9	16723.1	22030.6	20092.4	17893.5	19341.9	4.48619e+06	3.34461e+06	4.40612e+06	4.01849e+06	3.5787e+06	3.86837e+06	47523.2	35265.2	47134.3	42615.4	37700.3	41152.9	53239.8	57708.8	47987.5	43398.4
20419	EM-3rep-phosp-Frac10.FTMS.HCD.20419.20419.5.RT_85.921_min_5155.2_s.dta	rRtSYTEEDLAKEPPPTTSGEYFGVSLQEFDR	0.00597334	4243.05	0	BL_ORD_ID:5168	84	115	TcCLB.509585.10	dynein heavy chain; putative	dynein heavy chain, putative	structural	axoneme, contractile vacuole	TcChr14-S:549849-560969(-)	3706	TMT 6-plex on n-term peptide:1,phosphorylation of T:3,TMT 6-plex on K:12	5	4243.05	2.39518e-07	0	849.819	849.618	1	849.618	1.03313	-0.259277	NaN	15781.7	11557.5	18230.5	15671.3	10815.2	13668.7	3.15635e+06	2.31149e+06	3.6461e+06	3.13426e+06	2.16303e+06	2.73375e+06	33435.9	24364.1	39013.1	33241.5	22775.7	29082.4	37458	39869.9	39719.3	33852.3
5528	EM-3rep-phosp-Frac11.FTMS.HCD.5528.5528.5.RT_26.316_min_1579.0_s.dta	rASHNPNESHPNNSQTSAGPPDAtGGQQPGEDR	0.279927	3718.62	0	BL_ORD_ID:6808	10	42	TcCLB.507669.70	dynein intermediate chain; putative	Dynein intermediate chain 1, axonemal	protein binding	axoneme, cytoskeleton, dynein complex	TcChr26-S:687628-689631(-)	667	TMT 6-plex on n-term peptide:1,phosphorylation of T:24	5	3718.63	2.64856e-05	0	745.134	744.733	2	744.733	-0.611543	-1.69145	NaN	585.378	0	411.996	890.052	719.545	805.626	117076	54946.4	82399.2	178010	143909	161125	1240.21	549.464	880.594	1887.89	1517.1	1714.1	1389.4	899.155	896.534	1922.57
28777	EM-3rep-phosp-Frac9.FTMS.HCD.28777.28777.3.RT_119.564_min_7173.8_s.dta	iSTGGKDEPALVSLVLAGDFNsDAGSPPIR	0.276044	3520.82	0	BL_ORD_ID:16006	369	398	TcCLB.504073.10	endonuclease/exonuclease/phosphatase; putative	endonuclease/exonuclease/phosphatase, putative	endonuclease/exonuclease/phosphatase, putative	ciliary plasm, cytoplasm	TcChr30-S:285149-286783(+)	544	TMT 6-plex on n-term peptide:1,TMT 6-plex on K:6,phosphorylation of S:22	3	3520.82	8.66183e-06	0	1174.95	1174.61	1	1174.62	2.93536	1.92485	NaN	14960.4	10447.3	15589.3	12293.2	11650.2	13297.1	2.99208e+06	2.08945e+06	3.11786e+06	2.45864e+06	2.33005e+06	2.65942e+06	31695.7	22032.1	33355.5	26070.2	24543.4	28291.7	35508.5	36053.8	33959.3	26549.2
30328	EM-3rep-phosp-Frac6.FTMS.HCD.30328.30328.3.RT_128.372_min_7702.3_s.dta	lQMSSAAPLtPQSLQNLLLER	0.000141103	2618.37	0	BL_ORD_ID:2750	929	949	TcCLB.511751.200	epsilon-adaptin; putative;AP-1/4 adapter complex gamma/epsilon subunit; putative	epsilon-adaptin, putative	intracellular protein transport, vesicle-mediated transport	cytoplasm	TcChr32-S:456921-459950(+)	1009	TMT 6-plex on n-term peptide:1,phosphorylation of T:10	3	2618.37	7.71015e-09	0	874.133	873.797	1	873.799	1.37082	0.56096	NaN	4321.46	3154.16	3658.86	5828.64	5544.7	6370.43	864292	630832	731773	1.16573e+06	1.10894e+06	1.27409e+06	9155.64	6642.28	7822.31	12360.6	11689.4	13554.1	10257	10869.6	7963.91	12587.7
15734	EM-3rep-phosp-Frac10.FTMS.HCD.15734.15734.5.RT_66.966_min_4017.9_s.dta	gHNGATESLVHAGKGSEENDAGsLLSIHmEYVR	0.00162852	4018.92	0	BL_ORD_ID:2750	767	799	TcCLB.511751.200	epsilon-adaptin; putative;AP-1/4 adapter complex gamma/epsilon subunit; putative	epsilon-adaptin, putative	intracellular protein transport, vesicle-mediated transport	cytoplasm	TcChr32-S:456921-459950(+)	1009	TMT 6-plex on n-term peptide:1,TMT 6-plex on K:14,phosphorylation of S:23,oxidation of M:29	5	4018.92	6.63729e-08	0	805.194	804.792	2	804.793	0.360213	-0.93219	24.5962	18851.2	14849.2	18531.5	16138.1	15941.2	15754.5	3.77025e+06	2.96984e+06	3.7063e+06	3.22763e+06	3.18824e+06	3.1509e+06	39939.1	31321.3	39646.1	34228	33589.4	33520.2	44743.4	51254.9	40363.7	34856.8
19987	EM-3rep-phosp-Frac6.FTMS.HCD.19987.19987.4.RT_86.767_min_5206.0_s.dta	rIsLNPIVHEHIPPDYLSNLK	5.23274e-05	2992.63	0	BL_ORD_ID:8588	29	49	TcCLB.511039.3	ethanolamine phosphotransferase; putative	choline/ethanolamine phosphotransferase, putative	lipid metabolism	endoplasmic reticulum, nuclear envelope	TcChr37-S:361896-362198(+)	101	TMT 6-plex on n-term peptide:1,phosphorylation of S:3,TMT 6-plex on K:21	4	2992.63	5.20101e-09	0	749.417	749.165	1	749.166	1.17626	0.366398	NaN	6262.96	4033.5	6006.3	7892.39	7052.66	8897.23	1.25259e+06	806700	1.20126e+06	1.57848e+06	1.41053e+06	1.77945e+06	13269	8492.1	12845.5	16736.6	14865.5	18930.3	14865.1	13896.7	13078.1	17044.1
18061	EM-3rep-phosp-Frac10.FTMS.HCD.18061.18061.3.RT_76.386_min_4583.2_s.dta	sDDEGNFTQQGGEQTGSLTYPmQAGALKK	1.28495e-06	3611.69	0	BL_ORD_ID:3464	2	30	TcCLB.506925.120	eukaryotic initiation factor 5a; putative	eukaryotic translation initiation factor 5A	RNA binding, ribosome binding, translation elongation factor activity	polysome	TcChr39-S:152674-153177(+)	167	phosphorylation of S:1,oxidation of M:22,TMT 6-plex on K:28,TMT 6-plex on K:29	3	3611.69	3.47508e-11	0	1205.24	1204.9	1	1204.9	1.71356	0.421154	NaN	30322.5	21004.7	27897.8	24494.8	19323.1	24954	6.06451e+06	4.20095e+06	5.57955e+06	4.89895e+06	3.86462e+06	4.99081e+06	64242.7	44297.6	59694.6	51949.5	40703	53093.7	71970.5	72489.6	60775.2	52904
24448	EM-3rep-phosp-Frac10.FTMS.HCD.24448.24448.5.RT_102.281_min_6136.9_s.dta	nSCAANIFGGPPLEqKPPRPFRPsQLLTYEEAPNLSK	1.33833e-05	4959.57	0	BL_ORD_ID:8602	309	345	TcCLB.508719.70	flagellum targeting protein kharon1; putative (KH1)	flagellum targeting protein kharon1, putative	structural	ciliary pocket	TcChr37-S:375185-376402(+)	405	TMT 6-plex on n-term peptide:1,NEM C:3,deamidation of N and Q:15,TMT 6-plex on K:16,phosphorylation of S:24,TMT 6-plex on K:37	5	4959.56	8.78572e-10	0	993.325	992.919	2	992.924	4.3708	3.07839	NaN	33238.3	22559.1	41267.7	47800.8	45520	45008.5	6.64766e+06	4.51182e+06	8.25354e+06	9.56015e+06	9.104e+06	9.0017e+06	70420.1	47479.3	88265	101386	95940.7	95762.7	78891.1	77696.2	89862.7	103249
23929	EM-3rep-phosp-Frac10.FTMS.HCD.23929.23929.5.RT_100.172_min_6010.3_s.dta	nSCAANIFGGPPLEQKPPRPFRPSqLLtYEEAPNLSK	0.0594035	4959.56	0	BL_ORD_ID:8602	309	345	TcCLB.508719.70	flagellum targeting protein kharon1; putative (KH1)	flagellum targeting protein kharon1, putative	structural	ciliary pocket	TcChr37-S:375185-376402(+)	405	TMT 6-plex on n-term peptide:1,NEM C:3,TMT 6-plex on K:16,deamidation of N and Q:25,phosphorylation of T:28,TMT 6-plex on K:37	5	4959.56	3.70139e-06	0	993.524	992.919	3	992.922	2.6606	1.3682	NaN	14071.3	9350.03	14353.3	19680.8	16337.2	17051.1	2.81426e+06	1.87001e+06	2.87066e+06	3.93617e+06	3.26743e+06	3.41022e+06	29812.1	19679.2	30698.3	41746.7	34434.2	36278.9	33398.2	32203.5	31253.9	42513.7
19041	EM-3rep-phosp-Frac9.FTMS.HCD.19041.19041.4.RT_80.129_min_4807.8_s.dta	sLmNGPVAADIPDsPPPAAPSKK	0.000573608	3042.61	0	BL_ORD_ID:8602	50	72	TcCLB.508719.70	flagellum targeting protein kharon1; putative (KH1)	flagellum targeting protein kharon1, putative	structural	ciliary pocket	TcChr37-S:375185-376402(+)	405	TMT 6-plex on n-term peptide:1,oxidation of M:3,phosphorylation of S:14,TMT 6-plex on K:22,TMT 6-plex on K:23	4	3042.61	3.76087e-08	0	762.16	761.659	2	761.659	-0.385895	-1.39641	41.437	13052.3	9754.31	12414.8	11677.9	8283.73	9045.51	2.61046e+06	1.95086e+06	2.48297e+06	2.33558e+06	1.65675e+06	1.8091e+06	27653.2	20569.8	26565.6	24773.4	17448.2	19245.8	30979.6	33660.9	27046.5	25228.6
17901	EM-3rep-phosp-Frac8.FTMS.HCD.17901.17901.3.RT_75.797_min_4547.8_s.dta	kLEAGQLFNSKsPDIEPR	2.03178e-05	2795.52	0	BL_ORD_ID:8602	370	387	TcCLB.508719.70	flagellum targeting protein kharon1; putative (KH1)	flagellum targeting protein kharon1, putative	structural	ciliary pocket	TcChr37-S:375185-376402(+)	405	TMT 6-plex on K | TMT 6-plex on n-term peptide:1,TMT 6-plex on K:11,phosphorylation of S:12	3	2795.52	1.53539e-09	0	933.183	932.847	1	932.848	1.33059	0.583016	NaN	37178.5	24233.5	37490.7	32959.7	23402.9	23018.2	7.4357e+06	4.84671e+06	7.49814e+06	6.59193e+06	4.68058e+06	4.60364e+06	78768	51085.9	80227.1	69926	49288.6	48974.9	88243.1	83598.1	81679.4	71210.8
18451	EM-3rep-phosp-Frac8.FTMS.HCD.18451.18451.4.RT_77.913_min_4674.8_s.dta	kLEAGqLFNsKSPDIEPR	0.00441807	2796.49	0	BL_ORD_ID:8602	370	387	TcCLB.508719.70	flagellum targeting protein kharon1; putative (KH1)	flagellum targeting protein kharon1, putative	structural	ciliary pocket	TcChr37-S:375185-376402(+)	405	TMT 6-plex on K | TMT 6-plex on n-term peptide:1,deamidation of N and Q:6,phosphorylation of S:10,TMT 6-plex on K:11	4	2796.5	3.62315e-07	0	700.635	700.133	2	700.133	0.0358375	-0.711737	NaN	201078	114150	185804	170780	109026	119620	4.02156e+07	2.283e+07	3.71608e+07	3.41561e+07	2.18053e+07	2.3924e+07	426013	240566	397622	362321	229594	254511	477259	393667	404819	368978
21416	EM-3rep-phosp-Frac8.FTMS.HCD.21416.21416.3.RT_89.782_min_5386.9_s.dta	nAsPIADVASmPFSK	0.034084	2088.03	0	BL_ORD_ID:8514	677	691	TcCLB.511041.50	flagellum transition zone component; putative	flagellum transition zone component, putative	structural	ciliary basal body	TcChr37-S:287988-290318(+)	776	TMT 6-plex on n-term peptide:1,phosphorylation of S:3,oxidation of M:11,TMT 6-plex on K:15	3	2088.04	2.73e-06	0	697.354	697.02	1	697.02	0.1698	-0.577775	0	13271	9823.24	12307.7	10760.2	8662.49	10982.8	2.6542e+06	1.96465e+06	2.46154e+06	2.15203e+06	1.7325e+06	2.19657e+06	28116.6	20719.7	26335.3	22820.6	18247.5	23367.8	31498.8	33906.2	26812	23239.8
30255	EM-3rep-phosp-Frac5.FTMS.HCD.30255.30255.3.RT_129.105_min_7746.3_s.dta	iDDLEVKICRTLEGVSAVMEsTQLPR	0.180753	3564.84	0	BL_ORD_ID:600	870	895	TcCLB.511313.30	formin; putative	formin, putative	N/A	N/A	TcChr17-S:349575-353111(-)	1178	TMT 6-plex on n-term peptide:1,TMT 6-plex on K:7,NEM C:9,phosphorylation of S:21	3	3564.83	5.48267e-06	0	1189.62	1189.29	1	1189.29	1.70417	0.770862	NaN	3067.3	3771.27	5810.99	11468.8	14748	15480.8	613460	754254	1.1622e+06	2.29375e+06	2.9496e+06	3.09617e+06	6498.52	7921.68	12409.9	24314.8	31100.8	32938	7280.24	12963.2	12634.6	24761.6
18915	EM-3rep-phosp-Frac7.FTMS.HCD.18915.18915.4.RT_81.250_min_4875.0_s.dta	kLSPSEPNVAyICSR	2.8711e-05	2326.17	0	BL_ORD_ID:1588	177	191	TcCLB.507993.80	glycogen synthase kinase 3; putative	glycogen synthase kinase 3, putative	protein phosphorylation/dephosphorylation	ciliary plasm, ciliary tip, cytoplasm, nuclear lumen, nucleus, obsolete flagellum	TcChr40-S:703737-704798(-)	353	TMT 6-plex on K | TMT 6-plex on n-term peptide:1,phosphorylation of Y:11,NEM C:13	4	2326.18	2.23833e-09	0	583.054	582.552	2	582.552	0.186477	-0.605024	0	13462.5	9808.23	14106.7	13379.2	10704	9949.95	2.6925e+06	1.96165e+06	2.82133e+06	2.67584e+06	2.14079e+06	1.98999e+06	28522.3	20676.2	30182.8	28383.5	22550.4	21170.1	31953.3	33835	30729.2	28905
28770	EM-3rep-phosp-Frac9.FTMS.HCD.28770.28770.5.RT_119.533_min_7172.0_s.dta	kLANDPNLTLVEAPLLDPNVQPLsAEQLQALQEEAR	2.26339e-10	4475.37	0	BL_ORD_ID:17792	169	204	TcCLB.509455.80	GTP-binding nuclear protein rtb2; putative	GTP-binding nuclear protein rtb2, putative	intracellular protein transport, protein transport, signal transduction	intracellular, membrane	TcChr15-S:379234-379887(-)	217	TMT 6-plex on K | TMT 6-plex on n-term peptide:1,phosphorylation of S:24	5	4475.38	1.98022e-14	0	896.485	896.082	2	896.084	2.09348	1.08297	100	5164.42	3536.86	5784.01	4640.49	3760.42	3348.8	1.03288e+06	707373	1.1568e+06	928098	752084	669760	10941.6	7456.7	12377	9844.86	7920.32	7125.1	12257.7	12202.3	12601	10025.7
29024	EM-3rep-phosp-Frac3.FTMS.HCD.29024.29024.3.RT_126.142_min_7568.5_s.dta	sVFGVDFGNLNSTVAITR	0.126029	1975.93	0	BL_ORD_ID:1768	2	19	TcCLB.507831.60	heat shock protein 110; putative	heat shock protein 110, putative	Heat shock	N/A	TcChr40-S:1044569-1047067(+)	832	phosphorylation of S:1	3	1975.94	1.08347e-05	0	659.986	659.654	1	659.652	-3.83235	-4.47733	0	779.95	0	757.837	3956.52	3022.3	4960	155990	50712.5	151567	791304	604459	991999	1652.44	507.125	1615.95	8389.06	6374.45	10553.2	1851.21	829.871	1645.2	8543.19
30016	EM-3rep-phosp-Frac7.FTMS.HCD.30016.30016.4.RT_125.956_min_7557.4_s.dta	lGYYLENAmsTSAVPFLPDVNK	5.11444e-07	2982.48	0	BL_ORD_ID:1768	410	431	TcCLB.507831.60	heat shock protein 110; putative	heat shock protein 110, putative	Heat shock	N/A	TcChr40-S:1044569-1047067(+)	832	TMT 6-plex on n-term peptide:1,oxidation of M:9,phosphorylation of S:10,TMT 6-plex on K:22	4	2982.48	2.01198e-11	0	746.88	746.629	1	746.629	0.425082	-0.36642	NaN	3155.14	1845.3	3243.22	2275.3	2268	2912.78	631027	369059	648643	455059	453600	582556	6684.61	3891.06	6939.68	4824.2	4777.49	6197.41	7488.71	6367.41	7065.29	4912.84
21674	EM-3rep-phosp-Frac10.FTMS.HCD.21674.21674.3.RT_91.011_min_5460.7_s.dta	nAPEsGnEEEGANTQPPGTQESWVENEEAAKGDDALD	0.0639431	4423.94	0	BL_ORD_ID:1768	796	832	TcCLB.507831.60	heat shock protein 110; putative	heat shock protein 110, putative	Heat shock	N/A	TcChr40-S:1044569-1047067(+)	832	TMT 6-plex on n-term peptide:1,phosphorylation of S:5,deamidation of N and Q:7,TMT 6-plex on K:31	3	4423.92	5.42535e-06	0	1475.99	1475.64	1	1475.65	6.58372	5.29132	NaN	11929.6	8787.67	10964.6	8926.18	7846.43	6523.29	2.38593e+06	1.75753e+06	2.19292e+06	1.78524e+06	1.56929e+06	1.30466e+06	25274.6	18538.6	23461.1	18936.8	16528.9	13879.3	28315	30336.9	23885.8	19284.7
26253	EM-3rep-phosp-Frac4.FTMS.HCD.26253.26253.3.RT_113.343_min_6800.6_s.dta	dCHLLGTFDLsGIPPAPR	4.33643e-08	2342.14	0	BL_ORD_ID:16306	456	473	TcCLB.511211.160	heat shock protein 70 (hsp70); putative	heat shock protein 70 (hsp70), putative	Heat shock	contractile vacuole	TcChr30-S:685241-687205(-)	654	TMT 6-plex on n-term peptide:1,NEM C:2,phosphorylation of S:11	3	2342.13	2.32267e-12	0	781.719	781.718	0	781.719	1.25603	0.455938	NaN	15807.5	12278.4	15546.8	25900.6	25824.4	22711.3	3.16151e+06	2.45568e+06	3.10935e+06	5.18011e+06	5.16489e+06	4.54227e+06	33490.5	25842.4	33232.4	54939.3	54446.9	48322	37519.1	42289.1	33834	55948.7
11905	EM-3rep-phosp-Frac10.FTMS.HCD.11905.11905.4.RT_51.531_min_3091.9_s.dta	sAESLPsDESEAHQQPQPQKK	0.15444	2900.39	0	BL_ORD_ID:10364	2	22	TcCLB.509267.110	heat shock protein Hsp20; putative	heat shock protein Hsp20, putative	Heat shock	N/A	TcChr35-S:625238-625864(+)	208	acetylation of protein n-term:1,phosphorylation of S:7,TMT 6-plex on K:20,TMT 6-plex on K:21	4	2900.4	6.27422e-06	0	726.608	726.106	2	726.107	0.397944	-0.894459	0	17681.5	16929.9	19285.8	14247.4	14390.3	10838.9	3.53631e+06	3.38598e+06	3.85717e+06	2.84947e+06	2.87806e+06	2.16778e+06	37460.9	35728.7	41264.9	30224.7	30315.7	23061.5	41967.1	58467.2	42011.8	30780
28762	EM-3rep-phosp-Frac4.FTMS.HCD.28762.28762.4.RT_123.363_min_7401.8_s.dta	tVPLGFTFsFPTEQK	0.0165279	2236.15	0	BL_ORD_ID:14764	153	167	TcCLB.508951.20	hexokinase; putative	hexokinase, putative	carbohydrate metabolic process	glycosome	TcChr5-S:117169-118584(-)	471	TMT 6-plex on n-term peptide:1,phosphorylation of S:9,TMT 6-plex on K:15	4	2236.16	1.60715e-06	0	560.298	560.047	1	560.047	-0.0943064	-0.894399	49.6812	12360.4	8803.01	13252.4	10496.4	9728.91	10270.5	2.47207e+06	1.7606e+06	2.65048e+06	2.09927e+06	1.94578e+06	2.0541e+06	26187.2	18564	28355.8	22262	20495.2	21852.1	29337.3	30378.5	28869.1	22671.1
28866	EM-3rep-phosp-Frac5.FTMS.HCD.28866.28866.4.RT_123.450_min_7407.0_s.dta	tVPLGFtFSFPTEQK	0.0610271	2236.15	0	BL_ORD_ID:14764	153	167	TcCLB.508951.20	hexokinase; putative	hexokinase, putative	carbohydrate metabolic process	glycosome	TcChr5-S:117169-118584(-)	471	TMT 6-plex on n-term peptide:1,phosphorylation of T:7,TMT 6-plex on K:15	4	2236.16	5.93418e-06	0	560.298	560.047	1	560.048	0.997479	0.0641718	0	2214.36	1327.95	2381.63	1665.13	749.855	1486.36	442871	265590	476326	333027	149971	297272	4691.43	2800.04	5098.16	3531.96	1576.59	3162.46	5255.77	4582.05	5190.44	3596.85
14695	EM-3rep-phosp-Frac8.FTMS.HCD.14695.14695.3.RT_63.457_min_3807.4_s.dta	hIAFAHSsSSPPIFQER	0.0198053	2219.07	0	BL_ORD_ID:4982	480	496	TcCLB.506735.40	hypothetical protein	hypothetical protein	protein binding	N/A	TcChr14-S:278822-280840(-)	672	TMT 6-plex on n-term peptide:1,phosphorylation of S:8	3	2219.07	1.1724e-06	0	741.033	740.698	1	740.698	0.0913044	-0.65627	0	17201.1	14879.6	22066.5	14465.8	14784.3	9893.23	2.73605e+06	2.36679e+06	3.50996e+06	2.30096e+06	2.35164e+06	1.57364e+06	28983.5	24967.3	37553.3	24408.6	24766.7	16740.9	32470	40857	38233.1	24857.1
25121	EM-3rep-phosp-Frac8.FTMS.HCD.25121.25121.3.RT_104.714_min_6282.9_s.dta	fRLNSPTAFVNtEGTNLFHSAGGVMNSIR	1.37059e-06	3445.68	0	BL_ORD_ID:4468	226	254	TcCLB.508465.100	hypothetical protein	hypothetical protein	Unknown function	N/A	TcChr39-S:1532315-1533706(+)	463	TMT 6-plex on n-term peptide:1,phosphorylation of T:12	3	3445.68	3.37085e-11	0	1149.9	1149.57	1	1149.57	0.599413	-0.148162	NaN	10396.7	5938.27	10944	8091.62	7157.49	8580.33	2.07934e+06	1.18765e+06	2.18881e+06	1.61832e+06	1.4315e+06	1.71607e+06	22026.9	12518.2	23418.6	17160.3	15075.5	18256	24676.5	20485.1	23842.5	17475.6
21287	EM-3rep-phosp-Frac8.FTMS.HCD.21287.21287.3.RT_89.265_min_5355.9_s.dta	nHEQSLsTNVVTFGIVEK	4.13399e-05	2539.3	0	BL_ORD_ID:14094	98	115	TcCLB.510773.40	hypothetical protein	hypothetical protein	Unknown function	N/A	TcChr31-S:647170-649008(+)	612	TMT 6-plex on n-term peptide:1,phosphorylation of S:7,TMT 6-plex on K:18	3	2539.31	2.19368e-09	0	847.778	847.444	1	847.444	0.411771	-0.335804	NaN	27328.8	17543.2	22564.2	21907	17217.8	16708.7	5.46576e+06	3.50864e+06	4.51284e+06	4.3814e+06	3.44357e+06	3.34175e+06	57900	36991	48278.5	46474	36273.6	35550.5	64864.9	60532.8	49152.4	47327.9
18498	EM-3rep-phosp-Frac7.FTMS.HCD.18498.18498.4.RT_79.588_min_4775.3_s.dta	wDILPKsPTQHFSR	0.00580199	2249.17	0	BL_ORD_ID:15412	682	695	TcCLB.511181.140	hypothetical protein	hypothetical protein	Unknown function	N/A	TcChr38-S:1301576-1303879(+)	767	TMT 6-plex on n-term peptide:1,TMT 6-plex on K:6,phosphorylation of S:7	4	2249.18	5.95503e-07	0	563.553	563.301	1	563.302	0.930516	0.139015	NaN	6166.34	3323.76	7041.46	10085.6	7607.07	10625.7	1.23327e+06	664752	1.40829e+06	2.01713e+06	1.52141e+06	2.12514e+06	13064.3	6981.75	15060.9	21389.3	16032.8	22607.8	14635.8	11425.1	15333.5	21782.3
18633	EM-3rep-phosp-Frac10.FTMS.HCD.18633.18633.5.RT_78.704_min_4722.2_s.dta	lPNRVPHVADNSNsnVVDIQYDDGKGSLTEVK	3.16072e-06	4248.17	0	BL_ORD_ID:10014	667	698	TcCLB.507089.110	hypothetical protein; conserved	major facilitator superfamily, putative	major facilitator superfamily	acidocalcisome	TcChr35-S:201680-203803(-)	707	TMT 6-plex on n-term peptide:1,phosphorylation of S:14,deamidation of N and Q:15,TMT 6-plex on K:25,TMT 6-plex on K:32	5	4248.17	1.39196e-10	0	850.843	850.641	1	850.642	2.05486	0.762457	0	21090.9	16903.1	20129.2	18263.3	14057.9	16160.8	4.21818e+06	3.38063e+06	4.02583e+06	3.65266e+06	2.81158e+06	3.23217e+06	44684.1	35654.1	43071.4	38739.1	29612.6	34384.8	50059.3	58345.1	43851.1	39450.9
22478	EM-3rep-phosp-Frac8.FTMS.HCD.22478.22478.4.RT_94.049_min_5643.0_s.dta	dRELLPPLAESPFGPFPPCHGsRSEAK	0.201709	3596.79	0	BL_ORD_ID:4144	14	40	TcCLB.506887.20	hypothetical protein; conserved	hypothetical protein, conserved	binding	axoneme	TcChr39-S:1077890-1078849(-)	319	TMT 6-plex on n-term peptide:1,NEM C:19,phosphorylation of S:22,TMT 6-plex on K:27	4	3596.79	6.1463e-06	0	900.457	900.205	1	900.206	1.84128	1.0937	NaN	7851.69	5362.5	9159.94	7083.98	5060.64	6912.58	1.57034e+06	1.0725e+06	1.83199e+06	1.4168e+06	1.01213e+06	1.38252e+06	16634.9	11305.5	19603	15024.7	10655.8	14707.6	18636	18500.5	19957.9	15300.7
25998	EM-3rep-phosp-Frac9.FTMS.HCD.25998.25998.3.RT_108.253_min_6495.2_s.dta	sGGPTLPGENLLSLKEQsGLEGPTFAPSEYR	0.000103813	3768.91	0	BL_ORD_ID:10082	259	289	TcCLB.509067.50	hypothetical protein; conserved	hypothetical protein, conserved	protein binding	axoneme	TcChr35-S:281707-283635(-)	642	TMT 6-plex on n-term peptide:1,TMT 6-plex on K:15,phosphorylation of S:18	3	3768.9	2.5255e-09	0	1257.65	1257.31	1	1257.31	2.54915	1.53864	0	33362.4	28261.5	36790.9	30587.6	23792.3	27282.8	6.67249e+06	5.65231e+06	7.35818e+06	6.11752e+06	4.75846e+06	5.45657e+06	70683.1	59612.4	78727.7	64880.2	50111.7	58048.6	79185.7	97551	80152.8	66072.3
30187	EM-3rep-phosp-Frac5.FTMS.HCD.30187.30187.3.RT_128.830_min_7729.8_s.dta	mTTDAAALLAsNNFVDPAFHLDGNVIDFEAR	1.20367e-09	3643.71	0	BL_ORD_ID:20350	188	218	TcCLB.510611.40	hypothetical protein; conserved	Ankyrin repeats (3 copies), putative	protein binding	axoneme	TcChr28-S:87490-91092(+)	1200	TMT 6-plex on n-term peptide:1,phosphorylation of S:11	3	3643.72	3.09166e-14	0	1215.92	1215.58	1	1215.58	-0.49535	-1.42866	NaN	5093.41	3098.21	5856.38	11512.8	10154.2	12765.6	1.01868e+06	619642	1.17128e+06	2.30256e+06	2.03084e+06	2.55312e+06	10791.1	6498.51	12517.5	24414.4	21409.2	27160.8	12089.2	10634.3	12744.1	24863
21034	EM-3rep-phosp-Frac10.FTMS.HCD.21034.21034.5.RT_88.415_min_5304.9_s.dta	wVSLLQQNGQDAPPNEEMPEDDDADsKNEEGLRDDDGEVDEAAVRR	0.000573578	5691.55	0	BL_ORD_ID:17466	432	477	TcCLB.503953.10	hypothetical protein; conserved	hypothetical protein, conserved	Unknown function	axoneme	TcChr21-S:507066-508667(-)	533	TMT 6-plex on n-term peptide:1,phosphorylation of S:26,TMT 6-plex on K:27	5	5691.56	9.47123e-08	0	1139.92	1139.32	3	1139.32	1.29038	-0.00202166	NaN	13413.9	9447.54	13625.1	12899.5	9893.44	11170.8	2.68277e+06	1.88951e+06	2.72503e+06	2.5799e+06	1.97869e+06	2.23416e+06	28419.2	19915.8	29153.6	27362.2	20841.5	23767.6	31837.8	32590.7	29681.3	27865
20294	EM-3rep-phosp-Frac10.FTMS.HCD.20294.20294.5.RT_85.417_min_5125.0_s.dta	dRWVSLLqQNGQDAPPNEEMPEDDDADsKNEEGLRDDDGEVDEAAVR	0.000397285	5807.56	0	BL_ORD_ID:17466	430	476	TcCLB.503953.10	hypothetical protein; conserved	hypothetical protein, conserved	Unknown function	axoneme	TcChr21-S:507066-508667(-)	533	TMT 6-plex on n-term peptide:1,deamidation of N and Q:8,phosphorylation of S:28,TMT 6-plex on K:29	5	5807.57	1.01764e-07	0	1162.72	1162.52	1	1162.52	-1.10658	-2.39898	81.3816	12670.1	7544.64	12957.2	10839.9	8404.65	7602.2	2.53402e+06	1.50893e+06	2.59144e+06	2.16798e+06	1.68093e+06	1.52044e+06	26843.5	15902	27726.7	22997.5	17702.1	16174.9	30072.5	26022.4	28228.6	23420.1
25574	EM-3rep-phosp-Frac11.FTMS.HCD.25574.25574.3.RT_107.637_min_6458.2_s.dta	aVsPLsSQEVQAVVNAR	0.0110389	2143.02	0	BL_ORD_ID:2314	374	390	TcCLB.506543.100	hypothetical protein; conserved	hypothetical protein, conserved	Unknown function	axoneme	TcChr40-S:1825570-1827987(-)	805	TMT 6-plex on n-term peptide:1,phosphorylation of S:3,phosphorylation of S:6	3	2143.03	6.94577e-07	0	715.685	715.35	1	715.35	0.313299	-0.766607	NaN	1716.65	863.811	692.294	2644.87	2625.98	2456.6	343330	172762	138459	528973	525197	491319	3636.97	1814.38	1476.5	5609.88	5538.49	5226.8	4074.47	2969.09	1503.23	5712.95
15019	EM-3rep-phosp-Frac9.FTMS.HCD.15019.15019.3.RT_64.256_min_3855.3_s.dta	kRPAVLSsQEVQAVVnAR	0.0679975	2490.37	0	BL_ORD_ID:2314	413	430	TcCLB.506543.100	hypothetical protein; conserved	hypothetical protein, conserved	Unknown function	axoneme	TcChr40-S:1825570-1827987(-)	805	TMT 6-plex on K | TMT 6-plex on n-term peptide:1,phosphorylation of S:8,deamidation of N and Q:16	3	2490.37	7.52351e-06	0	831.466	831.131	1	831.132	0.491339	-0.519173	32.6611	50785.7	37796.5	52379.2	50525.6	38109.7	43040.4	1.01571e+07	7.55929e+06	1.04758e+07	1.01051e+07	7.62195e+06	8.60808e+06	107597	79681.4	112075	107176	80282.1	91575.4	120540	130392	114104	109145
17939	EM-3rep-phosp-Frac9.FTMS.HCD.17939.17939.3.RT_75.741_min_4544.5_s.dta	tKVTAsAnGLGPGVSLNK	8.66829e-08	2481.38	0	BL_ORD_ID:2314	756	773	TcCLB.506543.100	hypothetical protein; conserved	hypothetical protein, conserved	Unknown function	axoneme	TcChr40-S:1825570-1827987(-)	805	TMT 6-plex on n-term peptide:1,TMT 6-plex on K:2,phosphorylation of S:6,deamidation of N and Q:8,TMT 6-plex on K:18	3	2481.38	1.12736e-11	0	828.47	828.134	1	828.135	1.25775	0.247239	NaN	159150	133838	188071	153678	94634.2	124223	5.98488e+06	5.03304e+06	7.07247e+06	5.7791e+06	3.55875e+06	4.67145e+06	63399.2	53073.8	75682.3	61296.5	37459.7	49696.3	71025.6	86851.1	77052.3	62422.7
26431	EM-3rep-phosp-Frac7.FTMS.HCD.26431.26431.4.RT_111.342_min_6680.5_s.dta	iETVVLSDLFtPMSTTPAATRPQSSK	5.68748e-06	3314.72	0	BL_ORD_ID:9516	98	123	TcCLB.506775.40	hypothetical protein; conserved	hypothetical protein, conserved	Unknown function	axoneme	TcChr27-S:290803-292173(-)	456	TMT 6-plex on n-term peptide:1,phosphorylation of T:11,TMT 6-plex on K:26	4	3314.72	2.73607e-10	0	829.94	829.688	1	829.689	0.735313	-0.0561878	15.4876	6515.82	4169.53	6606.63	9281.21	8255.17	9696.91	1.30316e+06	833906	1.32133e+06	1.85624e+06	1.65103e+06	1.93938e+06	13804.7	8773.46	14128.3	19683.4	17401.1	20631.7	15465.3	14357.1	14384.1	20045.1
22869	EM-3rep-phosp-Frac10.FTMS.HCD.22869.22869.4.RT_95.864_min_5751.8_s.dta	eQLEVKDEEQPVMPLPEEGDsPGESVEPPLR	5.95141e-10	3996.93	0	BL_ORD_ID:12086	193	223	TcCLB.506795.20	hypothetical protein; conserved	hypothetical protein, conserved	Unknown function	axoneme	TcChr11-S:420464-422950(+)	828	TMT 6-plex on n-term peptide:1,TMT 6-plex on K:6,phosphorylation of S:21	4	3996.93	1.82201e-14	0	1000.74	1000.24	2	1000.24	1.55123	0.258822	NaN	19555.1	15713.9	20020.2	27677.3	26715	26718.2	3.91103e+06	3.14279e+06	4.00404e+06	5.53546e+06	5.34301e+06	5.34365e+06	41430.4	33097.8	42809.5	58702.5	56315.7	56847.3	46414.1	54161.9	43584.4	59781.1
29534	EM-3rep-phosp-Frac7.FTMS.HCD.29534.29534.4.RT_123.988_min_7439.3_s.dta	sLASITqIGDVSEEtGTPVGDVILGR	0.0029364	2923.46	0	BL_ORD_ID:12086	165	190	TcCLB.506795.20	hypothetical protein; conserved	hypothetical protein, conserved	Unknown function	axoneme	TcChr11-S:420464-422950(+)	828	TMT 6-plex on n-term peptide:1,deamidation of N and Q:7,phosphorylation of T:15	4	2923.46	1.26026e-07	0	732.124	731.873	1	731.873	-0.374602	-1.1661	NaN	1463.74	733.79	815.679	393.799	459.839	582.933	292748	146758	163136	78759.9	91967.7	116587	3101.14	1549.59	1745.6	834.776	968.282	1240.28	3474.19	2535.78	1777.2	850.113
14099	EM-3rep-phosp-Frac10.FTMS.HCD.14099.14099.5.RT_60.360_min_3621.6_s.dta	lHSATtGSmDHSGASLPLVIQHGESQGQK	0.00568165	3526.73	0	BL_ORD_ID:692	513	541	TcCLB.510055.100	hypothetical protein; conserved	hypothetical protein, conserved	Unknown function	axoneme	TcChr17-S:504866-509377(+)	1503	TMT 6-plex on n-term peptide:1,phosphorylation of T:6,oxidation of M:9,TMT 6-plex on K:29	5	3526.73	2.0933e-07	0	706.555	706.353	1	706.354	1.66262	0.370217	0	28204.1	19715.9	23939.5	22702.6	18548.2	20519.8	5.64082e+06	3.94318e+06	4.7879e+06	4.54052e+06	3.70965e+06	4.10395e+06	59754.4	41580.8	51220.5	48154.5	39077.3	43659.1	66942.4	68043.8	52147.6	49039.3
26277	EM-3rep-phosp-Frac11.FTMS.HCD.26277.26277.4.RT_110.513_min_6630.8_s.dta	gIIAPTSCGWsDILGGGsAASRASVTAGGEHVIK	0.101836	3967.92	0	BL_ORD_ID:1072	760	793	TcCLB.510535.20	hypothetical protein; conserved	hypothetical protein, conserved	Unknown function	axoneme	TcChr13-S:453100-461118(+)	2672	TMT 6-plex on n-term peptide:1,NEM C:8,phosphorylation of S:11,phosphorylation of S:18,TMT 6-plex on K:34	4	3967.93	3.21797e-06	0	993.744	992.99	3	992.991	1.36107	0.281168	NaN	5757.17	4615.2	7625.13	8722.57	8280.18	8169.52	1.15143e+06	923039	1.52503e+06	1.74451e+06	1.65604e+06	1.6339e+06	12197.4	9718.17	16309.2	18500.8	17451.5	17382	13664.6	15903	16604.4	18840.7
22023	EM-3rep-phosp-Frac6.FTMS.HCD.22023.22023.5.RT_94.937_min_5696.2_s.dta	ksVTLVKEPPCAIVIPAAETK	0.0192126	3314.91	0	BL_ORD_ID:1072	462	482	TcCLB.510535.20	hypothetical protein; conserved	hypothetical protein, conserved	Unknown function	axoneme	TcChr13-S:453100-461118(+)	2672	TMT 6-plex on K | TMT 6-plex on n-term peptide:1,phosphorylation of S:2,TMT 6-plex on K:7,NEM C:11,TMT 6-plex on K:21	5	3314.91	8.19299e-06	0	664.19	663.989	1	663.99	0.35475	-0.45511	NaN	34020.3	26892.8	37024.2	31455.2	22600.7	26828.1	6.80406e+06	5.37856e+06	7.40484e+06	6.29105e+06	4.52014e+06	5.36563e+06	72076.9	56714.7	79230	66723.3	47597.2	57081.1	80747.2	92809.2	80664.2	67949.3
15475	EM-3rep-phosp-Frac10.FTMS.HCD.15475.15475.4.RT_65.917_min_3955.0_s.dta	rEEPDELQIGDSLNsPKQPNK	1.63051e-09	3160.64	0	BL_ORD_ID:16880	3082	3102	TcCLB.509979.30	hypothetical protein; conserved	Fibronectin type III domain containing protein, putative	protein binding	axoneme, cilium, cytoplasm	TcChr33-S:858307-871584(+)	4425	TMT 6-plex on n-term peptide:1,phosphorylation of S:15,TMT 6-plex on K:17,TMT 6-plex on K:21	4	3160.64	7.80932e-14	0	791.419	791.167	1	791.168	1.56172	0.269318	48.3683	100974	70584.7	98325.3	92764.2	72307.7	75801.8	2.01948e+07	1.41169e+07	1.96651e+07	1.85528e+07	1.44615e+07	1.51604e+07	213928	148812	210384	196780	152326	161280	239661	243519	214192	200396
28451	EM-3rep-phosp-Frac7.FTMS.HCD.28451.28451.4.RT_119.571_min_7174.2_s.dta	tLHEEPNALEIADTAGDVSALAsSATDLVTLGK	2.63152e-13	3846.96	0	BL_ORD_ID:7220	202	234	TcCLB.506633.20	hypothetical protein; conserved	hypothetical protein, conserved	Unknown function	axoneme, cytoplasm	TcChr34-S:689358-694220(+)	1620	TMT 6-plex on n-term peptide:1,phosphorylation of S:23,TMT 6-plex on K:33	4	3846.95	8.99388e-18	0	962.999	962.746	1	962.748	2.04246	1.25095	NaN	8443.71	5071.92	7159.01	5298.43	6060.95	5794.81	1.68874e+06	1.01438e+06	1.4318e+06	1.05969e+06	1.21219e+06	1.15896e+06	17889.2	10699.1	15316.1	11236.2	12770.7	12329.4	20041.1	17508.3	15593.4	11442.7
28905	EM-3rep-phosp-Frac8.FTMS.HCD.28905.28905.3.RT_120.085_min_7205.1_s.dta	tLHEEPNALEIADTAGDVsALASSATDLVTLGK	1.33499e-14	3846.95	0	BL_ORD_ID:7220	202	234	TcCLB.506633.20	hypothetical protein; conserved	hypothetical protein, conserved	Unknown function	axoneme, cytoplasm	TcChr34-S:689358-694220(+)	1620	TMT 6-plex on n-term peptide:1,phosphorylation of S:19,TMT 6-plex on K:33	3	3846.95	3.43124e-19	0	1283.66	1283.33	1	1283.33	0.855971	0.108396	NaN	4509.8	2612.67	3837.43	3309.24	2657.68	3075.55	901959	522533	767486	661848	531535	615111	9554.65	5508.77	8211.2	7019.04	5598.25	6543.73	10704	9014.67	8359.84	7148.01
10919	EM-3rep-phosp-Frac10.FTMS.HCD.10919.10919.3.RT_47.564_min_2853.8_s.dta	nTTTTTTNNTDSDGIDGGsGRFR	0.0342353	2696.19	0	BL_ORD_ID:5336	305	327	TcCLB.510719.90	hypothetical protein; conserved	hypothetical protein, conserved	Unknown function	axoneme, cytoplasm	TcChr16-S:194333-195616(+)	427	TMT 6-plex on n-term peptide:1,phosphorylation of S:19	3	2696.19	1.66255e-06	0	900.073	899.737	1	899.738	1.95739	0.664988	NaN	10004.8	8537.33	14040.7	8774.94	7168.71	9411.7	2.00097e+06	1.70747e+06	2.80815e+06	1.75499e+06	1.43374e+06	1.88234e+06	21196.7	18010	30049.7	18609.2	15092.2	20024.9	23746.5	29471.9	30593.6	18951.1
17302	EM-3rep-phosp-Frac10.FTMS.HCD.17302.17302.4.RT_73.312_min_4398.7_s.dta	aSARsPVLPHLDFRPQSAEGR	0.171698	2412.17	0	BL_ORD_ID:4540	2	22	TcCLB.510749.50	hypothetical protein; conserved	Flagellar Member 5	protein binding	axoneme, motile cilium	TcChr39-S:1605489-1610165(-)	1558	acetylation of protein n-term:1,phosphorylation of S:5	4	2412.17	1.02238e-05	0	604.301	604.05	1	604.05	-0.111564	-1.40397	NaN	5118.64	2916.08	5026	6346.05	5352.11	6415.28	1.02373e+06	583216	1.0052e+06	1.26921e+06	1.07042e+06	1.28306e+06	10844.6	6136.62	10750.2	13459.1	11280	13649.5	12149.1	10042.1	10944.8	13706.4
31410	EM-3rep-phosp-Frac9.FTMS.HCD.31410.31410.4.RT_130.272_min_7816.3_s.dta	fPLDFNAFMQEIAEEAKEDPEEsEEDEDLQR	6.82071e-07	4237.89	0	BL_ORD_ID:13702	616	646	TcCLB.505843.30	hypothetical protein; conserved	DNA repair protein Rad9, putative	DNA damage checkpoint	checkpoint clamp complex, nucleus	TcChr7-S:266676-268676(+)	666	TMT 6-plex on n-term peptide:1,TMT 6-plex on K:17,phosphorylation of S:23	4	4237.9	4.57581e-11	0	1060.98	1060.48	2	1060.48	1.6035	0.592991	0	302954	196869	292941	290647	209659	231546	6.05907e+07	3.93738e+07	5.85883e+07	5.81294e+07	4.19317e+07	4.63093e+07	641851	414910	626811	616561	441656	492652	719060	678968	638157	627890
20976	EM-3rep-phosp-Frac9.FTMS.HCD.20976.20976.3.RT_87.916_min_5275.0_s.dta	hLGQVMEAYVSGEHSISSSNGsPLNLSK	6.78068e-10	3465.7	0	BL_ORD_ID:3828	207	234	TcCLB.504153.30	hypothetical protein; conserved	Flabarin, putative	N/A	ciliary membrane, cilium, cytoplasm, plasma membrane	TcChr39-S:654119-654928(+)	269	TMT 6-plex on n-term peptide:1,phosphorylation of S:22,TMT 6-plex on K:28	3	3465.7	1.60569e-14	0	1156.58	1156.24	1	1156.24	2.07639	1.06587	NaN	5789.6	5039.98	6771.55	5052.47	3863.6	5541.56	1.15792e+06	1.008e+06	1.35431e+06	1.01049e+06	772721	1.10831e+06	12266.1	10632.7	14491.4	10714.6	8135.78	11790.6	13741.6	17399.6	14753.7	10911.5
15041	EM-3rep-phosp-Frac10.FTMS.HCD.15041.15041.4.RT_64.160_min_3849.6_s.dta	nHVGYQPPLPESEVKEQDDPEPGEsAGEnR	0.00298293	3842.77	0	BL_ORD_ID:7164	133	162	TcCLB.510877.30	hypothetical protein; conserved	hypothetical protein, conserved	nucleic acid binding	ciliary plasm, cilium, cytoplasm, nuclear lumen, nucleolus	TcChr34-S:531764-532456(-)	230	TMT 6-plex on n-term peptide:1,TMT 6-plex on K:15,phosphorylation of S:25,deamidation of N and Q:29	4	3842.77	1.27634e-07	0	961.952	961.699	1	961.701	2.03691	0.744509	0	28698.7	19106.1	30382.5	25797	21715.7	24208.1	5.73973e+06	3.82122e+06	6.07651e+06	5.15941e+06	4.34315e+06	4.84163e+06	60802.3	40277.7	65010	54716.1	45745.2	51506.7	68116.3	65911.4	66186.8	55721.4
15232	EM-3rep-phosp-Frac10.FTMS.HCD.15232.15232.4.RT_64.931_min_3895.8_s.dta	nHVGYqPPLPESEVKEqDDPEPGEsAGENR	7.35152e-07	3843.77	0	BL_ORD_ID:7162	133	162	TcCLB.510877.30	hypothetical protein; conserved	hypothetical protein, conserved	nucleic acid binding	ciliary plasm, cilium, cytoplasm, nuclear lumen, nucleolus	TcChr34-S:531764-532456(-)	230	TMT 6-plex on n-term peptide:1,deamidation of N and Q:6,TMT 6-plex on K:15,deamidation of N and Q:17,phosphorylation of S:25	4	3843.75	3.15923e-11	0	962.203	961.945	1	961.952	7.14757	5.85517	89.1646	33889.3	20338.7	34169.7	28289.1	21255.1	23958.3	6.77786e+06	4.06773e+06	6.83394e+06	5.65782e+06	4.25101e+06	4.79165e+06	71799.4	42872.4	73120.6	60007.6	44764.8	50975	80436.2	70157.3	74444.2	61110.2
30847	EM-3rep-phosp-Frac7.FTMS.HCD.30847.30847.3.RT_129.354_min_7761.2_s.dta	tLMQLFAEFNIsDDEEEMAPVNHPTGK	2.13073e-09	3600.68	0	BL_ORD_ID:16118	233	259	TcCLB.507077.30	hypothetical protein; conserved	DnaJ domain containing protein, putative	DnaJ domain containing protein, putative	ciliary plasm, cytoplasm	TcChr30-S:462044-463132(-)	362	TMT 6-plex on n-term peptide:1,phosphorylation of S:12,TMT 6-plex on K:27	3	3600.69	5.83601e-14	0	1201.57	1201.24	1	1201.24	-1.8274	-2.6189	NaN	8186.01	3795.57	7190.25	10330.4	8779.11	11447.7	1.6372e+06	759114	1.43805e+06	2.06609e+06	1.75582e+06	2.28955e+06	17343.2	7978.14	15376.9	21907.1	18505.1	24356.9	19429.5	13055.6	15655.2	22309.7
16580	EM-3rep-phosp-Frac7.FTMS.HCD.16580.16580.3.RT_71.998_min_4319.9_s.dta	rLAGGAHGAIsPVSAWVDGR	0.0087501	2285.16	0	BL_ORD_ID:9208	146	165	TcCLB.507641.200	hypothetical protein; conserved	hypothetical protein, conserved	Unknown function	ciliary plasm, cytoplasm	TcChr37-S:1186511-1187695(-)	394	TMT 6-plex on n-term peptide:1,phosphorylation of S:11	3	2285.16	5.26734e-07	0	763.063	762.728	1	762.729	0.529067	-0.262434	0	12111.9	7837.78	12027	10428.8	8225.45	6765.12	2.42237e+06	1.56756e+06	2.40539e+06	2.08577e+06	1.64509e+06	1.35302e+06	25660.7	16523.6	25735.1	22126.6	17326.1	14393.9	28747.5	27039.5	26200.9	22533.2
22209	EM-3rep-phosp-Frac10.FTMS.HCD.22209.22209.4.RT_93.183_min_5591.0_s.dta	vATLTGSNEDGSsSPRETGEVINAAAVPLPSGVGR	3.4054e-06	3703.82	0	BL_ORD_ID:9472	556	590	TcCLB.506773.10	hypothetical protein; conserved	conserved protein, unknown function	Unknown function	ciliary plasm, cytoplasm, cytoplasmic stress granule, nuclear lumen	TcChr27-S:237700-239475(-)	591	TMT 6-plex on n-term peptide:1,phosphorylation of S:13	4	3703.82	1.01463e-10	0	927.467	926.964	2	926.966	2.11998	0.827573	100	19896.2	11895.1	18240.2	15429.1	13469.7	16363.8	3.97925e+06	2.37903e+06	3.64803e+06	3.08583e+06	2.69393e+06	3.27275e+06	42153.1	25079.1	39027.8	32721.3	28375.8	34816.5	47223.7	41040	39734.3	33322.5
14633	EM-3rep-phosp-Frac6.FTMS.HCD.14633.14633.3.RT_65.770_min_3946.2_s.dta	rPLsPPPSVGTALR	0.00269235	1755.96	0	BL_ORD_ID:12096	426	439	TcCLB.510409.30	hypothetical protein; conserved	TrkA-N domain containing protein, putative	N/A	ciliary plasm, cytoplasm, nuclear lumen	TcChr11-S:435936-437711(+)	591	TMT 6-plex on n-term peptide:1,phosphorylation of S:4	3	1755.96	5.34834e-07	0	586.328	586.327	0	586.328	0.742662	-0.0671972	46.476	16570.9	13602.4	15612.4	12385.4	10997.7	11812.8	2.86437e+06	2.35126e+06	2.6987e+06	2.14089e+06	1.90102e+06	2.04191e+06	30342.9	24806.8	28872.5	22704	20022.5	21722.4	33992.9	40594.3	29395.2	23121.1
13467	EM-3rep-phosp-Frac10.FTMS.HCD.13467.13467.5.RT_57.818_min_3469.1_s.dta	vLESRPPSLSEPPGQQPATETRPVSLGsPAHAR	0.0697336	3756.91	0	BL_ORD_ID:4366	364	396	TcCLB.510741.40	hypothetical protein; conserved	hypothetical protein, conserved	nucleic acid binding	ciliary plasm, cytoplasm, nuclear lumen	TcChr39-S:1419736-1421481(+)	581	TMT 6-plex on n-term peptide:1,phosphorylation of S:28	5	3756.92	3.05916e-06	0	752.591	752.39	1	752.391	0.361808	-0.930596	70.14	14477.8	11006.7	13130.3	10749.5	9994.2	8623.46	2.89556e+06	2.20133e+06	2.62607e+06	2.1499e+06	1.99884e+06	1.72469e+06	30673.3	23221.7	28093.8	22803.2	21055.2	18347.8	34363	38000.5	28602.4	23222.2
9595	EM-3rep-phosp-Frac10.FTMS.HCD.9595.9595.5.RT_42.240_min_2534.4_s.dta	hYAGDEEEEEGKGKDsDNETK	1.60607e-05	3362.59	0	BL_ORD_ID:8314	134	154	TcCLB.506563.100	hypothetical protein; conserved	nucleosome assembly protein (NAP), putative	nucleosome assembly	ciliary plasm, cytoplasm, nuclear lumen	TcChr9-S:468924-469847(+)	307	TMT 6-plex on n-term peptide:1,TMT 6-plex on K:12,TMT 6-plex on K:14,phosphorylation of S:16,TMT 6-plex on K:21	5	3362.6	6.93288e-10	0	673.727	673.527	1	673.527	0.0452881	-1.24712	NaN	29625.4	17026.2	30166	23598.6	21050.9	14648.3	5.92508e+06	3.40525e+06	6.0332e+06	4.71973e+06	4.21019e+06	2.92965e+06	62765.7	35890.4	64547.9	50070.2	44343.2	31166.5	70315.9	58731.9	65716.3	50990.2
16022	EM-3rep-phosp-Frac9.FTMS.HCD.16022.16022.3.RT_68.194_min_4091.7_s.dta	rCsLDVASDSSGTPAK	0.069502	2256.08	0	BL_ORD_ID:13182	434	449	TcCLB.504425.70	hypothetical protein; conserved	hypothetical protein, conserved	ATP binding, ATPase activity	ciliary pocket, vesicle	TcChr22-S:258213-261728(+)	1171	TMT 6-plex on n-term peptide:1,NEM C:2,phosphorylation of S:3,TMT 6-plex on K:16	3	2256.09	3.8952e-06	0	753.37	753.036	1	753.035	-1.07402	-2.08453	46.5466	39074.5	27619.7	38351.1	36974.6	27152.7	32294.9	7.8149e+06	5.52394e+06	7.67023e+06	7.39492e+06	5.43053e+06	6.45899e+06	82785	58226.7	82061.1	78429.3	57197.6	68712.6	92743.3	95283.5	83546.5	79870.4
27724	EM-3rep-phosp-Frac6.FTMS.HCD.27724.27724.4.RT_117.776_min_7066.6_s.dta	kLPVVLTSMPNATLtASNGFPATGFIPR	1.1507e-07	3437.85	0	BL_ORD_ID:17724	2624	2651	TcCLB.509233.120	hypothetical protein; conserved	hypothetical protein, conserved	Unknown function	ciliary transition zone	TcChr15-S:279269-290290(-)	3673	TMT 6-plex on K | TMT 6-plex on n-term peptide:1,phosphorylation of T:15	4	3437.85	8.55666e-12	0	860.722	860.471	1	860.471	0.0869141	-0.722946	8.82477	7501.75	6852.95	9749.61	5713.29	6464.16	7220.21	1.50035e+06	1.37059e+06	1.94992e+06	1.14266e+06	1.29283e+06	1.44404e+06	15893.5	14462.7	20862.5	12113.8	13615.5	15362.1	17805.4	23667	21240.2	12336.4
11745	EM-3rep-phosp-Frac9.FTMS.HCD.11745.11745.3.RT_51.339_min_3080.4_s.dta	smEHsLNEYTFHPR	0.119774	2071.9	0	BL_ORD_ID:11378	671	684	TcCLB.510323.20	hypothetical protein; conserved	Flagellum attachment zone protein 19, putative	structural	cilium	TcChr36-S:642107-645259(+)	1050	TMT 6-plex on n-term peptide:1,oxidation of M:2,phosphorylation of S:5	3	2071.9	1.22206e-05	0	691.976	691.641	1	691.641	-0.221348	-1.23186	58.9249	13353.9	9401.74	11727.8	10362.1	9249.56	9453.17	2.67079e+06	1.88035e+06	2.34557e+06	2.07242e+06	1.84991e+06	1.89063e+06	28292.2	19830.4	25092.3	21978.9	19487.4	20113.1	31695.5	32450.8	25546.5	22382.7
24600	EM-3rep-phosp-Frac10.FTMS.HCD.24600.24600.4.RT_102.901_min_6174.0_s.dta	kFEDFLASFQPSIAERsNGTNVDSR	0.0512228	3352.64	0	BL_ORD_ID:11378	979	1003	TcCLB.510323.20	hypothetical protein; conserved	Flagellum attachment zone protein 19, putative	structural	cilium	TcChr36-S:642107-645259(+)	1050	TMT 6-plex on K | TMT 6-plex on n-term peptide:1,phosphorylation of S:17	4	3352.65	1.74756e-06	0	839.42	839.17	1	839.169	-0.890583	-2.18299	0	24394	19868.8	28642.4	25417.2	15768.3	19355.6	4.87881e+06	3.97377e+06	5.72847e+06	5.08345e+06	3.15366e+06	3.87112e+06	51682.3	41892	61297.1	53920.7	33201.8	41182.1	57899.2	68553	62406.7	54911.4
8037	EM-3rep-phosp-Frac10.FTMS.HCD.8037.8037.3.RT_35.985_min_2159.1_s.dta	hGEnGNDDDsEPENNDLSR	6.10172e-13	2422.93	0	BL_ORD_ID:9878	329	347	TcCLB.507559.60	hypothetical protein; conserved	hypothetical protein, conserved	Unknown function	cilium	TcChr27-S:780427-782217(+)	596	TMT 6-plex on n-term peptide:1,deamidation of N and Q:4,phosphorylation of S:10	3	2422.94	1.71976e-16	0	808.987	808.652	1	808.653	0.81437	-0.478034	100	14437.9	9653.81	13395.1	11910.5	11219.6	10291.1	2.88758e+06	1.93076e+06	2.67901e+06	2.3821e+06	2.24392e+06	2.05823e+06	30588.8	20356.3	28657.9	25264.4	23639.8	21896	34268.3	33311.5	29176.7	25728.6
17146	EM-3rep-phosp-Frac6.FTMS.HCD.17146.17146.3.RT_75.591_min_4535.5_s.dta	gIPDsIKLASGK	0.155144	1952.13	0	BL_ORD_ID:1480	24	35	TcCLB.509651.10	hypothetical protein; conserved	hypothetical protein, conserved	Unknown function	cilium	TcChr40-S:521768-523051(+)	427	TMT 6-plex on n-term peptide:1,phosphorylation of S:5,TMT 6-plex on K:7,TMT 6-plex on K:12	3	1952.13	4.76926e-05	0	651.719	651.718	0	651.719	1.71882	0.908962	0	228078	160687	242536	228074	151644	179650	2.63859e+07	1.85897e+07	2.80586e+07	2.63855e+07	1.75435e+07	2.07834e+07	279512	195916	300216	279866	184741	221100	313135	320602	305650	285008
17141	EM-3rep-phosp-Frac8.FTMS.HCD.17141.17141.3.RT_72.897_min_4373.8_s.dta	aDAVEPVPsDHPFVSEK	0.0781539	2361.16	0	BL_ORD_ID:544	665	681	TcCLB.511303.140	hypothetical protein; conserved	hypothetical protein, conserved	Unknown function	cilium	TcChr17-S:235539-237671(-)	710	TMT 6-plex on n-term peptide:1,phosphorylation of S:9,TMT 6-plex on K:17	3	2361.17	4.02835e-06	0	788.732	788.063	2	788.063	0.250269	-0.497306	0	16451.8	11839.8	14488.2	14409.7	9338.39	11299.9	3.29035e+06	2.36795e+06	2.89764e+06	2.88194e+06	1.86768e+06	2.25998e+06	34855.4	24966.6	31002.9	30568.3	19668.5	24042.3	39048.2	40855.9	31564.1	31130
25735	EM-3rep-phosp-Frac7.FTMS.HCD.25735.25735.4.RT_108.518_min_6511.1_s.dta	rIsGPVPATTAGLASTLFGEELNR	0.000212266	2765.43	0	BL_ORD_ID:7006	382	405	TcCLB.503865.70	hypothetical protein; conserved	hypothetical protein, conserved	Unknown function	cilium, cytoplasm	TcChr34-S:293914-296142(-)	742	TMT 6-plex on n-term peptide:1,phosphorylation of S:3	4	2765.43	1.25475e-08	0	692.616	692.365	1	692.365	-0.0698001	-0.861301	NaN	2515.97	2139.58	2377.49	1669.28	940.152	1839.9	503195	427917	475498	333856	188030	367979	5330.46	4515.95	5088.86	3539.96	1978.07	3914.67	5971.66	7390	5180.98	3605.01
23182	EM-3rep-phosp-Frac7.FTMS.HCD.23182.23182.4.RT_98.192_min_5891.5_s.dta	iFsVGTLTEmNSTSIVHREEYEQLQAYTR	0.0192813	3726.78	0	BL_ORD_ID:4980	497	525	TcCLB.506735.50	hypothetical protein; conserved	hypothetical protein, conserved	Unknown function	cilium, cytoplasm	TcChr14-S:274213-277638(-)	1141	TMT 6-plex on n-term peptide:1,phosphorylation of S:3,oxidation of M:10	4	3726.78	6.38306e-07	0	932.955	932.702	1	932.704	1.81705	1.02555	0	5575.27	4314.76	5407.13	5198.64	4302.41	4848.64	1.11505e+06	862952	1.08143e+06	1.03973e+06	860483	969729	11812	9098.81	11568.7	11026.5	9064.62	10316.3	13232.9	14889.5	11778.1	11229.1
29802	EM-3rep-phosp-Frac7.FTMS.HCD.29802.29802.4.RT_125.083_min_7505.0_s.dta	dGVISSAGEIMsPENLPLPLNVTINHVYFQR	3.08326e-12	3718.86	0	BL_ORD_ID:13200	250	280	TcCLB.504427.50	hypothetical protein; conserved	5'-AMP-activated protein kinase subunit beta, putative	protein phosphorylation/dephosphorylation	cilium, cytoplasm, glycosome	TcChr22-S:285717-286652(+)	311	TMT 6-plex on n-term peptide:1,phosphorylation of S:12	4	3718.86	9.98273e-17	0	931.226	930.723	2	930.724	0.871019	0.0795174	0	4464.05	3570.57	4331.37	6764.49	5770.43	6150.36	892810	714114	866273	1.3529e+06	1.15409e+06	1.23007e+06	9457.73	7518.44	9261.85	14348.1	12164.1	13085.9	10595.4	12303.3	9429.5	14611.7
16051	EM-3rep-phosp-Frac9.FTMS.HCD.16051.16051.3.RT_68.310_min_4098.6_s.dta	iPTGVStSSSPSKDPVK	0.379954	2453.34	0	BL_ORD_ID:3012	34	50	TcCLB.511733.90	hypothetical protein; conserved	hypothetical protein, conserved	Unknown function	contractile vacuole	TcChr32-S:767045-767395(-)	116	TMT 6-plex on n-term peptide:1,phosphorylation of T:7,TMT 6-plex on K:13,TMT 6-plex on K:17	3	2453.34	3.4887e-05	0	818.787	818.787	0	818.787	0.770621	-0.239892	NaN	102756	75097.6	99245.9	87034.1	75199.4	66046.5	2.05512e+07	1.50195e+07	1.98492e+07	1.74068e+07	1.50399e+07	1.32093e+07	217704	158378	212348	184637	158425	140524	243892	259174	216192	188029
27206	EM-3rep-phosp-Frac6.FTMS.HCD.27206.27206.2.RT_115.687_min_6941.2_s.dta	qNLEsPVDCVFVVHR	0.0105827	1928.85	0	BL_ORD_ID:12126	270	284	TcCLB.508265.100	hypothetical protein; conserved	cytoskeleton associated protein, putative	structural	cortical cytoskeleton, cytoskeleton	TcChr11-S:473721-477221(+)	1166	pyro-glu from n-term Q:1,phosphorylation of S:5,NEM C:9	2	1928.85	6.69663e-07	0	965.433	965.432	0	965.433	1.02108	0.211225	NaN	12881.9	10230.9	15156.4	11691.2	11656.4	12347.5	2.57637e+06	2.04617e+06	3.03128e+06	2.33824e+06	2.33128e+06	2.46951e+06	27292.1	21577.3	32428.5	24794.2	24557.3	26271.4	30575.1	35309.6	33015.5	25249.8
17400	EM-3rep-phosp-Frac7.FTMS.HCD.17400.17400.3.RT_75.267_min_4516.0_s.dta	gLNLTNCDGRPLtR	0.054717	1962.96	0	BL_ORD_ID:12126	462	475	TcCLB.508265.100	hypothetical protein; conserved	cytoskeleton associated protein, putative	structural	cortical cytoskeleton, cytoskeleton	TcChr11-S:473721-477221(+)	1166	TMT 6-plex on n-term peptide:1,NEM C:7,phosphorylation of T:13	3	1962.95	4.81664e-06	0	655.326	655.326	0	655.326	0.603849	-0.187652	90.0836	40975.1	29496.8	39129.8	37987.6	31853.5	32315.9	3.65376e+06	2.63024e+06	3.48922e+06	3.38736e+06	2.84039e+06	2.88162e+06	38705.1	27727.9	37325.8	35926.7	29922.6	30655.5	43361	45374.5	38001.4	36586.8
15118	EM-3rep-phosp-Frac10.FTMS.HCD.15118.15118.4.RT_64.469_min_3868.1_s.dta	hCTAEDAAAKVsGIQnGEANK	0.120414	3006.47	0	BL_ORD_ID:12126	572	592	TcCLB.508265.100	hypothetical protein; conserved	cytoskeleton associated protein, putative	structural	cortical cytoskeleton, cytoskeleton	TcChr11-S:473721-477221(+)	1166	TMT 6-plex on n-term peptide:1,NEM C:2,TMT 6-plex on K:10,phosphorylation of S:12,deamidation of N and Q:16,TMT 6-plex on K:21	4	3006.47	4.34346e-06	0	752.625	752.625	0	752.625	-0.503512	-1.79592	NaN	40259.6	28268.2	37476.6	36450.4	30646.6	30693.2	8.05193e+06	5.65365e+06	7.49532e+06	7.29008e+06	6.12932e+06	6.13863e+06	85295.9	59600.3	80180.5	77320	64570.7	65304.6	95556.2	97531.2	81631.9	78740.7
14927	EM-3rep-phosp-Frac10.FTMS.HCD.14927.14927.5.RT_63.699_min_3822.0_s.dta	hCTAEDAAAKVsGIQNGEANKVnGNGTR	3.97804e-06	3704.81	0	BL_ORD_ID:12126	572	599	TcCLB.508265.100	hypothetical protein; conserved	cytoskeleton associated protein, putative	structural	cortical cytoskeleton, cytoskeleton	TcChr11-S:473721-477221(+)	1166	TMT 6-plex on n-term peptide:1,NEM C:2,TMT 6-plex on K:10,phosphorylation of S:12,TMT 6-plex on K:21,deamidation of N and Q:23	5	3704.82	1.61906e-10	0	742.372	741.971	2	741.971	-0.0425236	-1.33493	0	43074.1	31022	42762.4	40635.3	30053.3	35034.8	8.61481e+06	6.2044e+06	8.55249e+06	8.12705e+06	6.01066e+06	7.00696e+06	91258.6	65403.4	91500.6	86195.3	63307.1	74542.1	102236	107028	93156.9	87779
15234	EM-3rep-phosp-Frac10.FTMS.HCD.15234.15234.4.RT_64.939_min_3896.3_s.dta	gASPPnGPAsASVPSQPHSTPHSDWSQGDTGFEPR	0.332341	3851.7	0	BL_ORD_ID:12126	1051	1085	TcCLB.508265.100	hypothetical protein; conserved	cytoskeleton associated protein, putative	structural	cortical cytoskeleton, cytoskeleton	TcChr11-S:473721-477221(+)	1166	TMT 6-plex on n-term peptide:1,deamidation of N and Q:6,phosphorylation of S:10	4	3851.7	2.1589e-05	0	964.436	963.933	2	963.934	1.43434	0.141936	NaN	12141	10238.9	12339	10499.8	9521.27	9530.87	2.42819e+06	2.04778e+06	2.46779e+06	2.09996e+06	1.90425e+06	1.90617e+06	25722.4	21599.6	26400.3	22271.1	20059.2	20278.5	28816.6	35346.1	26878.2	22680.3
15712	EM-3rep-phosp-Frac10.FTMS.HCD.15712.15712.4.RT_66.877_min_4012.6_s.dta	dNEsEDNINALEGYEYDDmHKGGKK	0.0917989	3882.83	0	BL_ORD_ID:12126	627	651	TcCLB.508265.100	hypothetical protein; conserved	cytoskeleton associated protein, putative	structural	cortical cytoskeleton, cytoskeleton	TcChr11-S:473721-477221(+)	1166	TMT 6-plex on n-term peptide:1,phosphorylation of S:4,oxidation of M:19,TMT 6-plex on K:21,TMT 6-plex on K:24,TMT 6-plex on K:25	4	3882.84	2.92018e-06	0	972.472	971.718	3	971.719	1.40497	0.112571	4.24521	25853.1	20896.4	19944.2	18210.6	14397.6	12339.2	5.17063e+06	4.17928e+06	3.98884e+06	3.64212e+06	2.87952e+06	2.46784e+06	54773.6	44096.8	42674.6	38635.9	30329.7	26253.6	61362.4	72161	43447	39345.8
17184	EM-3rep-phosp-Frac10.FTMS.HCD.17184.17184.4.RT_72.835_min_4370.1_s.dta	dNEsEDNINALEGYEYDDmHKGGK	8.34281e-06	3525.58	0	BL_ORD_ID:12126	627	650	TcCLB.508265.100	hypothetical protein; conserved	cytoskeleton associated protein, putative	structural	cortical cytoskeleton, cytoskeleton	TcChr11-S:473721-477221(+)	1166	TMT 6-plex on n-term peptide:1,phosphorylation of S:4,oxidation of M:19,TMT 6-plex on K:21,TMT 6-plex on K:24	4	3525.59	4.26917e-10	0	882.655	882.404	1	882.404	1.0502	-0.242206	NaN	121799	87605.9	88569.4	73214.5	49917.3	55259.5	2.43599e+07	1.75212e+07	1.77139e+07	1.46429e+07	9.98345e+06	1.10519e+07	258050	184885	189544	155320	105111	117573	289091	302550	192975	158174
26456	EM-3rep-phosp-Frac9.FTMS.HCD.26456.26456.3.RT_110.118_min_6607.1_s.dta	aENTmFPsPPAQFDENVPHFYTVPQELIR	0.000763163	3698.73	0	BL_ORD_ID:2582	911	939	TcCLB.507927.40	hypothetical protein; conserved	hypothetical protein, conserved	protein phosphorylation/dephosphorylation	cytoplasm	TcChr32-S:288566-291847(+)	1093	TMT 6-plex on n-term peptide:1,oxidation of M:5,phosphorylation of S:8	3	3698.73	2.12782e-08	0	1234.25	1233.92	1	1233.92	2.03403	1.02352	NaN	15195.3	8919.93	14396.5	13460.4	8614.72	9213.2	3.03906e+06	1.78399e+06	2.8793e+06	2.69208e+06	1.72294e+06	1.84264e+06	32193.4	18797.8	30808.2	28557.5	18142	19602.5	36066	30761.2	31365.8	29082.2
12243	EM-3rep-phosp-Frac7.FTMS.HCD.12243.12243.3.RT_54.871_min_3292.3_s.dta	hSLLsSPGnK	0.156528	1577.82	0	BL_ORD_ID:598	837	846	TcCLB.511311.70	hypothetical protein; conserved	hypothetical protein, conserved	binding	cytoplasm	TcChr17-S:323644-337437(-)	4597	TMT 6-plex on n-term peptide:1,phosphorylation of S:5,deamidation of N and Q:9,TMT 6-plex on K:10	3	1577.82	3.12306e-05	0	527.282	526.948	1	526.948	0.0164986	-0.775003	0	6053.89	4089.64	5379.54	4091.05	3800.27	5272.36	1.21078e+06	817929	1.07591e+06	818211	760053	1.05447e+06	12826	8627.84	11510.8	8673.98	8005.3	11217.8	14368.9	14118.8	11719.1	8833.35
28404	EM-3rep-phosp-Frac5.FTMS.HCD.28404.28404.3.RT_121.576_min_7294.5_s.dta	mCsPPFFSPVPMSQTPGPR	0.194036	2496.12	0	BL_ORD_ID:2582	889	907	TcCLB.507927.40	hypothetical protein; conserved	hypothetical protein, conserved	protein binding	cytoplasm	TcChr32-S:288566-291847(+)	1093	TMT 6-plex on n-term peptide:1,NEM C:2,phosphorylation of S:3	3	2496.12	9.99361e-06	0	833.049	833.049	0	833.049	0.0279681	-0.905339	100	6968.72	5887.35	8209.29	10481.2	9269.54	10701.5	1.39374e+06	1.17747e+06	1.64186e+06	2.09624e+06	1.85391e+06	2.14029e+06	14764.2	12399.8	17557.9	22228.9	19537.5	22769.1	16540.3	20291.4	17875.7	22637.3
10897	EM-3rep-phosp-Frac9.FTMS.HCD.10897.10897.3.RT_47.968_min_2878.1_s.dta	vsPPSQSAHAVK	0.126704	1744.93	0	BL_ORD_ID:4074	544	555	TcCLB.506885.200	hypothetical protein; conserved	hypothetical protein, conserved	metal ion binding	cytoplasm	TcChr39-S:959586-962696(-)	1036	TMT 6-plex on n-term peptide:1,phosphorylation of S:2,TMT 6-plex on K:12	3	1744.93	1.9538e-05	0	582.65	582.65	0	582.65	0.418175	-0.592337	9.14644	10569.4	7098.53	11405.2	16923.1	17950.2	21883.1	2.11388e+06	1.41971e+06	2.28103e+06	3.38462e+06	3.59004e+06	4.37661e+06	22392.8	14931.6	24381.7	35880.8	37843.9	46559.7	25086.4	24434.4	24823	36540
14613	EM-3rep-phosp-Frac10.FTMS.HCD.14613.14613.4.RT_62.438_min_3746.3_s.dta	vSPGDVDDGAPPtPTGRPEGADDNGPSK	2.9838e-06	3242.5	0	BL_ORD_ID:4074	906	933	TcCLB.506885.200	hypothetical protein; conserved	hypothetical protein, conserved	metal ion binding	cytoplasm	TcChr39-S:959586-962696(-)	1036	TMT 6-plex on n-term peptide:1,phosphorylation of T:13,TMT 6-plex on K:28	4	3242.51	1.19204e-10	0	812.137	811.636	2	811.635	-0.357761	-1.65016	0	48679.9	40386.9	51607.3	48754.1	35472	38427.4	9.73598e+06	8.07739e+06	1.03215e+07	9.75081e+06	7.09439e+06	7.68547e+06	103135	85166	110428	103425	74718.9	81760.3	115542	139367	112427	105325
25763	EM-3rep-phosp-Frac4.FTMS.HCD.25763.25763.3.RT_111.401_min_6684.1_s.dta	vLsPLSSPHPPASSLAAAAWALSPR	0.00568039	2791.46	0	BL_ORD_ID:938	457	481	TcCLB.503853.10	hypothetical protein; conserved	Nitrogen permease regulator 2, putative	Nitrogen permease regulator 2	cytoplasm	TcChr13-S:274154-276640(+)	828	TMT 6-plex on n-term peptide:1,phosphorylation of S:3	3	2791.46	2.72388e-07	0	931.831	931.495	1	931.496	1.50185	0.701762	NaN	19110.7	13801.6	20780.5	26245.6	24511	26173.8	3.82213e+06	2.76032e+06	4.1561e+06	5.24912e+06	4.90221e+06	5.23477e+06	40488.7	29061.2	44442.5	55664	51664.2	55689	45359.1	47556.4	45247	56686.8
16709	EM-3rep-phosp-Frac10.FTMS.HCD.16709.16709.4.RT_70.914_min_4254.8_s.dta	rAsGGTRYPNVVQGQVQCWNK	0.0165876	3010.5	0	BL_ORD_ID:214	764	784	TcCLB.509099.20	hypothetical protein; conserved	kinetoplastid-specific dual specificity phosphatase, putative	protein dephosphorylation/dephosphorylation	cytoplasm	TcChr23-S:357083-360235(-)	1050	TMT 6-plex on n-term peptide:1,phosphorylation of S:3,NEM C:18,TMT 6-plex on K:21	4	3010.5	6.63877e-07	0	753.884	753.632	1	753.633	0.972931	-0.319472	86.1667	51994	36513.6	55552.4	52186.8	36109.2	41708.7	1.03988e+07	7.30271e+06	1.11105e+07	1.04374e+07	7.22183e+06	8.34173e+06	110157	76961.6	118875	110706	76054.3	88741.8	123408	125942	121026	112740
16625	EM-3rep-phosp-Frac10.FTMS.HCD.16625.16625.4.RT_70.572_min_4234.3_s.dta	nAPALAAAAAAVQQmRsPTVTTHQPYR	0.000100375	3145.56	0	BL_ORD_ID:2324	55	81	TcCLB.430061.9	hypothetical protein; conserved	Histone RNA hairpin-binding protein RNA-binding domain containing protein, putative	RNA binding	cytoplasm	TcChr40-S:1836598-1837758(-)	387	TMT 6-plex on n-term peptide:1,oxidation of M:15,phosphorylation of S:17	4	3145.57	3.86594e-09	0	787.902	787.4	2	787.401	1.13294	-0.159462	19.6787	18628.7	13182.4	16065.1	14605.9	10765.1	12180.3	3.72574e+06	2.63648e+06	3.21302e+06	2.92118e+06	2.15301e+06	2.43606e+06	39467.6	27804.3	34376.3	30982.9	22674.8	25915.5	44215.2	45499.6	34998.6	31552.2
29256	EM-3rep-phosp-Frac6.FTMS.HCD.29256.29256.3.RT_124.003_min_7440.2_s.dta	aQCLHGIESALAALGVEEsEEPAAAAImR	0.00260706	3386.6	0	BL_ORD_ID:5460	932	960	TcCLB.506673.69	hypothetical protein; conserved	Basal body protein	structural	cytoplasm	TcChr16-S:331365-335453(+)	1363	TMT 6-plex on n-term peptide:1,NEM C:3,phosphorylation of S:19,oxidation of M:28	3	3386.61	6.791e-08	0	1130.21	1129.88	1	1129.88	-0.6359	-1.44576	NaN	5690.31	3418.88	6257.1	8122.17	6627.15	7538.69	1.13806e+06	683776	1.25142e+06	1.62443e+06	1.32543e+06	1.50774e+06	12055.7	7191.66	13383.5	17227.5	13967.2	16039.8	13506	11768.6	13625.8	17544
24726	EM-3rep-phosp-Frac11.FTMS.HCD.24726.24726.3.RT_104.166_min_6250.0_s.dta	eNFAGAGLPEKLEDFADDsEGETDDENYR	0.00162748	3770.65	0	BL_ORD_ID:16750	600	628	TcCLB.504423.30	hypothetical protein; conserved	hypothetical protein, conserved	Unknown function	cytoplasm	TcChr33-S:642106-644571(+)	821	TMT 6-plex on n-term peptide:1,TMT 6-plex on K:11,phosphorylation of S:19	3	3770.65	1.08585e-07	0	1258.23	1257.89	1	1257.89	0.518432	-0.561473	71.5924	17781.3	6617.36	21551.2	31067	36020.2	33060.5	3.55626e+06	1.32347e+06	4.31025e+06	6.21339e+06	7.20405e+06	6.61211e+06	37672.2	13850.9	46066.9	65884.9	75943.4	70341.6	42203.9	22665.9	46900.8	67095.5
21585	EM-3rep-phosp-Frac8.FTMS.HCD.21585.21585.3.RT_90.464_min_5427.8_s.dta	kKTEsELVATNNSDDLPLDILR	9.93098e-07	3237.74	0	BL_ORD_ID:14782	412	433	TcCLB.506493.9	hypothetical protein; conserved	CHAT domain containing protein, putative	Unknown function	cytoplasm	TcChr5-S:131829-134471(-)	881	TMT 6-plex on K | TMT 6-plex on n-term peptide:1,TMT 6-plex on K:2,phosphorylation of S:5	3	3237.75	5.58736e-11	0	1080.59	1080.26	1	1080.26	0.654004	-0.0935705	NaN	12561.7	9892.99	13917.5	12869.2	8421.08	10378.5	2.51234e+06	1.9786e+06	2.7835e+06	2.57384e+06	1.68422e+06	2.07569e+06	26613.8	20857.7	29782.9	27299.7	17734.6	22081.9	29815.2	34132	30322	27801.3
14410	EM-3rep-phosp-Frac7.FTMS.HCD.14410.14410.4.RT_63.464_min_3807.8_s.dta	tGQLVVRPPNLsASLNGR	0.0482588	2187.17	0	BL_ORD_ID:3156	95	112	TcCLB.506945.50	hypothetical protein; conserved	T-complex protein 11, putative	Unknown function	cytoplasm	TcChr32-S:899948-902350(+)	800	TMT 6-plex on n-term peptide:1,phosphorylation of S:12	4	2187.17	6.6619e-06	0	547.8	547.8	0	547.8	-0.673239	-1.46474	0	5205.35	3995.78	5188.29	4360.24	4042.24	3257.09	1.04107e+06	799157	1.03766e+06	872048	808448	651418	11028.3	8428.19	11100.7	9250.05	8516.23	6929.98	12354.9	13792.1	11301.7	9420.01
15568	EM-3rep-phosp-Frac10.FTMS.HCD.15568.15568.4.RT_66.295_min_3977.7_s.dta	vNEFSQGNISLTGGGSSLNTStRPTPR	0.378679	3085.51	0	BL_ORD_ID:19646	874	900	TcCLB.508567.100	hypothetical protein; conserved	hypothetical protein, conserved	Unknown function	cytoplasm	TcChr19-S:161519-165736(-)	1405	TMT 6-plex on n-term peptide:1,phosphorylation of T:22	4	3085.5	1.37907e-05	0	772.635	772.383	1	772.384	1.63665	0.34425	26.7962	28777.2	23386.7	28956.1	25179.4	22835.1	25013.7	5.75545e+06	4.67735e+06	5.79122e+06	5.03587e+06	4.56701e+06	5.00274e+06	60968.8	49330.5	61953	53402.9	48109.9	53220.7	68302.8	80725.6	63074.4	54384.1
18068	EM-3rep-phosp-Frac9.FTMS.HCD.18068.18068.3.RT_76.241_min_4574.4_s.dta	rGsAPEAQQYDFLSYR	0.16915	2196.02	0	BL_ORD_ID:14040	702	717	TcCLB.509007.10	hypothetical protein; conserved	hypothetical protein, conserved	Unknown function	cytoplasm	TcChr31-S:564275-566923(+)	882	TMT 6-plex on n-term peptide:1,phosphorylation of S:3	3	2196.02	1.0556e-05	0	733.349	733.014	1	733.014	0.482175	-0.528338	NaN	138921	79135	123362	99354.5	106055	91436.4	1.99694e+07	1.13754e+07	1.77328e+07	1.42819e+07	1.5245e+07	1.31437e+07	211540	119927	189687	151464	160612	139826	236987	196251	193120	154247
11086	EM-3rep-phosp-Frac10.FTMS.HCD.11086.11086.3.RT_48.237_min_2894.2_s.dta	hINDSANsNAGGDGDFPAR	9.53225e-07	2222.95	0	BL_ORD_ID:20190	1226	1244	TcCLB.509143.10	hypothetical protein; conserved	Vps51/Vps67, putative	Unknown function	cytoplasm	TcChr24-S:424755-429176(+)	1473	TMT 6-plex on n-term peptide:1,phosphorylation of S:8	3	2222.95	8.02648e-11	0	742.327	741.992	1	741.992	0.136398	-1.15601	44.0809	25435.8	16530	25873.5	20898.7	20034.5	18528.3	5.08717e+06	3.30599e+06	5.1747e+06	4.17974e+06	4.0069e+06	3.70566e+06	53889.5	34853.3	55358.5	44329.1	42208.5	39421.9	60371.9	57034.8	56360.6	45143.6
29441	EM-3rep-phosp-Frac4.FTMS.HCD.29441.29441.3.RT_126.098_min_7565.9_s.dta	fTLDANACPFtPTTMVTGR	0.147143	2476.14	0	BL_ORD_ID:9426	1185	1203	TcCLB.510101.340	hypothetical protein; conserved	hypothetical protein, conserved	Unknown function	cytoplasm	TcChr27-S:161013-164957(-)	1314	TMT 6-plex on n-term peptide:1,NEM C:8,phosphorylation of T:11	3	2476.14	7.29622e-06	0	826.386	826.386	0	826.386	-0.233881	-1.03397	NaN	3945.24	2827.31	4416.78	5768.55	5060.75	5784.21	789048	565461	883356	1.15371e+06	1.01215e+06	1.15684e+06	8358.56	5951.53	9446.36	12234.4	10666.7	12306.8	9364.03	9739.21	9617.35	12459.2
31819	EM-3rep-phosp-Frac9.FTMS.HCD.31819.31819.2.RT_131.897_min_7913.8_s.dta	wSILEYDGEADEDsDDAS	0.0153174	2324.9	0	BL_ORD_ID:12708	406	423	TcCLB.510297.50	hypothetical protein; conserved	hypothetical protein, conserved	Unknown function	cytoplasm	TcChr20-S:164950-166221(+)	423	TMT 6-plex on n-term peptide:1,phosphorylation of S:14	2	2324.91	1.97797e-06	0	1163.96	1163.46	1	1163.46	2.02781	1.01729	NaN	6807.93	5003.1	7094.97	10109.6	9275.12	9417.08	1.36159e+06	1.00062e+06	1.41899e+06	2.02191e+06	1.85502e+06	1.88342e+06	14423.6	10532	15171.7	21442.8	19551.8	20036.3	16158.6	17234.9	15446.3	21836.7
13033	EM-3rep-phosp-Frac10.FTMS.HCD.13033.13033.3.RT_56.072_min_3364.3_s.dta	rPSsAAEATGTSTGGTAPASLAK	0.00252181	2626.33	0	BL_ORD_ID:8062	19	41	TcCLB.511419.20	hypothetical protein; conserved	hypothetical protein, conserved	Unknown function	cytoplasm	TcChr9-S:83263-85122(-)	619	TMT 6-plex on n-term peptide:1,phosphorylation of S:4,TMT 6-plex on K:23	3	2626.34	1.14145e-07	0	876.788	876.453	1	876.454	0.959489	-0.332915	NaN	27476.6	18595.9	23701.4	21583.1	19488.2	20378.7	5.49531e+06	3.71918e+06	4.74029e+06	4.31663e+06	3.89764e+06	4.07574e+06	58213	39218	50708.6	45778.1	41060.8	43358.9	65215.6	64177.2	51626.5	46619.2
30112	EM-3rep-phosp-Frac3.FTMS.HCD.30112.30112.3.RT_130.363_min_7821.8_s.dta	nSTVsEDPILVSLACWK	0.00441613	2524.27	0	BL_ORD_ID:4236	132	148	TcCLB.506147.110	hypothetical protein; conserved	Flagellum attachment zone protein 4	structural	cytoplasm, cytoskeleton	TcChr39-S:1165030-1168236(-)	1068	TMT 6-plex on n-term peptide:1,phosphorylation of S:5,NEM C:15,TMT 6-plex on K:17	3	2524.27	2.06854e-07	0	842.766	842.43	1	842.431	0.983888	0.338907	NaN	80112	38002.1	76659.2	158650	249918	179239	1.4563e+07	6.90814e+06	1.39354e+07	2.88399e+07	4.54308e+07	3.25826e+07	154269	72378.3	148688	305788	479071	346623	172826	118441	151379	311407
30536	EM-3rep-phosp-Frac4.FTMS.HCD.30536.30536.3.RT_130.348_min_7820.9_s.dta	nSTVsEDPILVSLACWK	0.000648577	2524.26	0	BL_ORD_ID:4236	132	148	TcCLB.506147.110	hypothetical protein; conserved	Flagellum attachment zone protein 4	structural	cytoplasm, cytoskeleton	TcChr39-S:1165030-1168236(-)	1068	TMT 6-plex on n-term peptide:1,phosphorylation of S:5,NEM C:15,TMT 6-plex on K:17	3	2524.27	2.98251e-08	0	842.764	842.43	1	842.43	-0.466872	-1.26696	93.7803	254405	70827.5	178517	305430	372539	340586	3.30007e+06	918757	2.31568e+06	3.96196e+06	4.83248e+06	4.41799e+06	34958.4	9623.21	24738.6	42009.1	50949.4	46999.9	39163.6	15747.6	25186.4	42781
2253	EM-3rep-phosp-Frac11.FTMS.HCD.2253.2253.5.RT_12.998_min_779.9_s.dta	tQHGHGHGQNNTsSPRGPR	0.202155	2333.07	0	BL_ORD_ID:2270	321	339	TcCLB.510089.200	hypothetical protein; conserved	Eukaryotic translation initiation factor 3 subunit F	protein binding	cytoplasm, eukaryotic translation initiation factor 3 complex	TcChr40-S:1774627-1775664(-)	345	TMT 6-plex on n-term peptide:1,phosphorylation of S:13	5	2333.07	1.79901e-05	0	467.822	467.622	1	467.621	-1.73691	-2.81681	61.9563	241139	172769	262652	208134	83779.2	101914	1.45947e+06	1.04567e+06	1.58968e+06	1.25971e+06	507065	616822	15460.5	11025.3	17014.4	13365.8	5330.84	6561.94	17320.2	18042.1	17322.4	13611.3
28984	EM-3rep-phosp-Frac4.FTMS.HCD.28984.28984.2.RT_124.255_min_7455.3_s.dta	aILDSsMSGPAIDFAGSVIK	0.0218222	2516.3	0	BL_ORD_ID:15470	1581	1600	TcCLB.509247.30	hypothetical protein; conserved	CCR4-NOT transcription complex subunit 1	N/A	cytoplasmic stress granule	TcChr10-S:103625-110614(+)	2329	TMT 6-plex on n-term peptide:1,phosphorylation of S:6,TMT 6-plex on K:20	2	2516.3	7.59772e-07	0	1259.66	1259.16	1	1259.16	0.341919	-0.458173	NaN	28461.1	11000.8	28198.7	46846.3	39238.8	49517.8	5.69222e+06	2.20015e+06	5.63974e+06	9.36925e+06	7.84776e+06	9.90356e+06	60298.9	23047.4	60294	99349.5	82718.7	105357	67552.4	37715.3	61385.5	101175
28883	EM-3rep-phosp-Frac7.FTMS.HCD.28883.28883.3.RT_121.333_min_7280.0_s.dta	tQHSAtISPIPLLELLQER	7.39272e-06	2454.3	0	BL_ORD_ID:15470	268	286	TcCLB.509247.30	hypothetical protein; conserved	CCR4-NOT transcription complex subunit 1	N/A	cytoplasmic stress granule	TcChr10-S:103625-110614(+)	2329	TMT 6-plex on n-term peptide:1,phosphorylation of T:6	3	2454.31	5.47568e-10	0	819.445	819.11	1	819.11	0.193321	-0.59818	95.9589	7861.99	5832.86	8515.96	7785.25	5514.95	6540.75	1.5724e+06	1.16657e+06	1.70319e+06	1.55705e+06	1.10299e+06	1.30815e+06	16656.8	12296.7	18223	16514.4	11615.7	13916.5	18660.4	20122.6	18552.9	16817.8
16827	EM-3rep-phosp-Frac9.FTMS.HCD.16827.16827.5.RT_71.335_min_4280.1_s.dta	sAAATLHQHDIGTLLSsKNITAPPR	0.266205	3136.68	0	BL_ORD_ID:15470	840	864	TcCLB.509247.30	hypothetical protein; conserved	CCR4-NOT transcription complex subunit 1	N/A	cytoplasmic stress granule	TcChr10-S:103625-110614(+)	2329	TMT 6-plex on n-term peptide:1,phosphorylation of S:17,TMT 6-plex on K:18	5	3136.68	2.23664e-05	0	628.544	628.343	1	628.343	-0.390152	-1.40066	14.3788	20593.9	15991.5	18104.5	15565.4	13165.2	12472.2	4.11877e+06	3.1983e+06	3.62091e+06	3.11308e+06	2.63303e+06	2.49443e+06	43631.1	33738.9	38738.1	33019.4	27733.8	26536.5	48879.5	55211	39439.3	33626.1
29309	EM-3rep-phosp-Frac7.FTMS.HCD.29309.29309.4.RT_123.069_min_7384.1_s.dta	ySVVSTFTNsPFVAVLEDTENNEDDEKELIR	5.00858e-13	4097.97	0	BL_ORD_ID:12276	37	67	TcCLB.511571.20	hypothetical protein; conserved	conserved protein, unknown function	Unknown function	cytoplasmic stress granule	TcChr12-S:129573-130466(+)	297	TMT 6-plex on n-term peptide:1,phosphorylation of S:10,TMT 6-plex on K:27	4	4097.98	1.63289e-17	0	1026	1025.5	2	1025.5	-0.0051882	-0.796689	NaN	9248.04	5020.18	6954.84	6484.65	4150.12	3780.54	1.84961e+06	1.00404e+06	1.39097e+06	1.29693e+06	830025	756108	19593.3	10584.4	14883.2	13759.3	8739.84	8043.7	21950.2	17320.6	15152.6	14012.1
30191	EM-3rep-phosp-Frac9.FTMS.HCD.30191.30191.3.RT_125.308_min_7518.5_s.dta	nGsSGGAnVPLSLGIILEQR	0.00273362	2291.17	0	BL_ORD_ID:6458	379	398	TcCLB.506797.50	hypothetical protein; conserved	cytoskeleton associated protein, putative	structural	cytoskeleton	TcChr26-S:190611-191870(+)	419	TMT 6-plex on n-term peptide:1,phosphorylation of S:3,deamidation of N and Q:8	3	2291.17	1.7592e-07	0	765.066	764.731	1	764.732	0.575992	-0.434521	28.8997	3662.65	2821.88	4111.93	3667.23	2751.02	2778.1	732530	564377	822386	733447	550204	555620	7759.85	5949.48	8798.79	7779.78	5794.56	5910.85	8693.29	9735.86	8958.06	7922.73
10077	EM-3rep-phosp-Frac10.FTMS.HCD.10077.10077.4.RT_44.172_min_2650.3_s.dta	sLSHsLSHSISRPTSVSPR	0.447351	2343.18	0	BL_ORD_ID:6092	566	584	TcCLB.506529.250	hypothetical protein; conserved	Flagellum attachment zone protein 2	Unknown function	cytoskeleton	TcChr6-S:81981-86255(-)	1424	TMT 6-plex on n-term peptide:1,phosphorylation of S:5	4	2343.19	3.49603e-05	0	587.055	586.805	1	586.805	-0.400245	-1.69265	24.1935	13559	9363.65	13528.4	12511.1	9210.56	11579.8	2.71179e+06	1.87273e+06	2.70568e+06	2.50222e+06	1.84211e+06	2.31595e+06	28726.6	19740.2	28948	26536.7	19401	24637.8	32182.2	32303.3	29472	27024.2
26771	EM-3rep-phosp-Frac8.FTMS.HCD.26771.26771.3.RT_111.407_min_6684.4_s.dta	vVFSAqRsPASVLEDPLAQQQEIADFASER	1.69892e-08	3597.78	0	BL_ORD_ID:11204	14	43	TcCLB.507529.20	hypothetical protein; conserved	hypothetical protein, conserved	transmembrane transport	integral component of membrane	TcChr36-S:359240-361702(+)	820	TMT 6-plex on n-term peptide:1,deamidation of N and Q:6,phosphorylation of S:8	3	3597.76	4.00416e-13	0	1200.27	1200.26	0	1200.27	6.0399	5.29232	NaN	14178	9676.41	11155	10035.2	6780.06	6688.11	2.83561e+06	1.93528e+06	2.231e+06	2.00704e+06	1.35601e+06	1.33762e+06	30038.2	20412.5	23871.3	21291.1	14278.7	14230	33651.5	33403.5	24303.4	21682.3
22152	EM-3rep-phosp-Frac5.FTMS.HCD.22152.22152.3.RT_96.511_min_5790.7_s.dta	fASSSIsPPILNK	0.421533	1898.03	0	BL_ORD_ID:14074	558	570	TcCLB.510773.100	hypothetical protein; conserved	Flagellar Member 4	protein binding	motile cilium	TcChr31-S:634115-639040(+)	1641	TMT 6-plex on n-term peptide:1,phosphorylation of S:7,TMT 6-plex on K:13	3	1898.03	6.9767e-05	0	634.019	633.685	1	633.685	0.0614799	-0.871828	0	19815.4	16343.2	20345.9	29196.8	29892.6	32587.9	3.96309e+06	3.26864e+06	4.06918e+06	5.83935e+06	5.97853e+06	6.51758e+06	41981.8	34421.3	43499.7	61915.3	63018.8	69335.9	47031.9	56327.8	44287.2	63052.9
28195	EM-3rep-phosp-Frac8.FTMS.HCD.28195.28195.4.RT_117.187_min_7031.2_s.dta	gKNDtGGGEMAADDLLPFLPPLLHR	3.51042e-07	3171.61	0	BL_ORD_ID:11692	215	239	TcCLB.503697.100	hypothetical protein; conserved	hypothetical protein, conserved	binding	N/A	TcChr36-S:1013133-1018463(-)	1776	TMT 6-plex on n-term peptide:1,TMT 6-plex on K:2,phosphorylation of T:5	4	3171.62	1.48213e-11	0	794.163	793.912	1	793.912	0.162909	-0.584666	NaN	3105.36	1842.45	3527.33	4324.47	3720.7	4425.54	621072	368489	705466	864894	744141	885108	6579.16	3875.84	7544.77	9171.47	7841.63	9416.04	7370.57	6342.52	7681.34	9339.98
31519	EM-3rep-phosp-Frac9.FTMS.HCD.31519.31519.3.RT_130.693_min_7841.6_s.dta	tNsLNTNmDLDGNPVLAPPLINELFPPLPK	1.63401e-06	3797.97	0	BL_ORD_ID:2692	300	329	TcCLB.507925.50	hypothetical protein; conserved	hypothetical protein, conserved	protein binding	N/A	TcChr32-S:393707-399298(+)	1863	TMT 6-plex on n-term peptide:1,phosphorylation of S:3,oxidation of M:8,TMT 6-plex on K:30	3	3797.97	5.13679e-11	0	1267.67	1267	2	1267	1.25632	0.245806	NaN	32844.8	24491.5	32267.3	27162.6	27043.4	23144.8	6.56896e+06	4.89829e+06	6.45345e+06	5.43251e+06	5.40867e+06	4.62896e+06	69586.4	51657.2	69033.8	57617.7	56980.7	49244.3	77957.1	84533	70283.4	58676.4
14145	EM-3rep-phosp-Frac10.FTMS.HCD.14145.14145.6.RT_60.548_min_3632.9_s.dta	gRADGPSLCSDSVHLNHsAHTDAEFLHPR	1.03887e-05	3559.62	0	BL_ORD_ID:17774	266	294	TcCLB.509453.79	hypothetical protein; conserved	hypothetical protein, conserved	calcium ion binding	N/A	TcChr15-S:351595-353895(-)	766	TMT 6-plex on n-term peptide:1,NEM C:9,phosphorylation of S:18	6	3559.62	7.22645e-10	0	594.613	594.278	2	594.278	0.347413	-0.94499	0	12215.9	9582.76	12847.5	11328.6	8614.7	8434.45	2.44319e+06	1.91655e+06	2.5695e+06	2.26572e+06	1.72294e+06	1.68689e+06	25881.2	20208.7	27491.3	24033.1	18145.5	17945.6	28994.5	33070	27988.9	24474.7
21990	EM-3rep-phosp-Frac9.FTMS.HCD.21990.21990.3.RT_92.016_min_5520.9_s.dta	rsPTSWmQTTAFNDSGCGLLR	0.140585	2777.24	0	BL_ORD_ID:14062	279	299	TcCLB.509007.70	hypothetical protein; conserved	protein phosphatase 2C, putative	protein phosphorylation/dephosphorylation	N/A	TcChr31-S:586366-591096(+)	1576	TMT 6-plex on n-term peptide:1,phosphorylation of S:2,oxidation of M:7,NEM C:17	3	2777.25	6.2203e-06	0	927.092	926.757	1	926.758	0.0769806	-0.933532	38.2986	39503	31282.5	43301.1	38138.4	28053.4	37684.1	7.9006e+06	6.2565e+06	8.66022e+06	7.62769e+06	5.61068e+06	7.53682e+06	83692.8	65965.4	92658.6	80888.2	59086.6	80178.9	93760.4	107947	94335.8	82374.4
24168	EM-3rep-phosp-Frac9.FTMS.HCD.24168.24168.3.RT_100.824_min_6049.5_s.dta	aTNIHsSGGLAEVVDSFEDAAnRPEVIDR	0.00703501	3378.6	0	BL_ORD_ID:2784	333	361	TcCLB.511751.60	hypothetical protein; conserved	Intraflagellar transport complex B protein 46 C terminal, putative	intraciliary transport	N/A	TcChr32-S:495248-496627(+)	459	TMT 6-plex on n-term peptide:1,phosphorylation of S:6,deamidation of N and Q:22	3	3378.59	1.75524e-07	0	1127.88	1127.21	2	1127.21	6.2768	5.26629	NaN	28212.8	23542.7	27989.1	20884.5	21406.2	18162.8	5.64255e+06	4.70853e+06	5.59782e+06	4.1769e+06	4.28123e+06	3.63255e+06	59772.8	49679.4	59885.5	44299.8	45097.5	38644.2	66963	81296.5	60969.6	45113.7
18351	EM-3rep-phosp-Frac10.FTMS.HCD.18351.18351.4.RT_77.562_min_4653.7_s.dta	nVFVPHInGDTsDSEPHVTPDAATNAPR	0.000939641	3267.51	0	BL_ORD_ID:11440	256	283	TcCLB.506695.20	hypothetical protein; conserved	START domain containing protein, putative	lipid binding	N/A	TcChr36-S:708009-709106(+)	365	TMT 6-plex on n-term peptide:1,deamidation of N and Q:8,phosphorylation of S:12	4	3267.5	3.80437e-08	0	818.388	817.883	2	817.886	3.31207	2.01967	33.8735	19059.9	14443.7	19815.4	17831.3	14206.3	15966	3.81198e+06	2.88873e+06	3.96309e+06	3.56625e+06	2.84126e+06	3.1932e+06	40381.1	30456.3	42399.3	37822.3	29926.4	33970.2	45238.6	49839.4	43166.8	38517.2
25655	EM-3rep-phosp-Frac11.FTMS.HCD.25655.25655.3.RT_107.968_min_6478.1_s.dta	fLHVVTDAAGsPVNsIVGEVSPNSTSR	2.57323e-06	3128.47	0	BL_ORD_ID:12706	60	86	TcCLB.510297.10	hypothetical protein; conserved	hypothetical protein, conserved	metal ion binding	N/A	TcChr20-S:148692-149315(+)	207	TMT 6-plex on n-term peptide:1,phosphorylation of S:11,phosphorylation of S:15	3	3128.48	7.58191e-11	0	1044.17	1043.83	1	1043.83	0.348021	-0.731885	NaN	6126.69	5763.23	6704.26	18538.6	24982.7	20955.1	1.22534e+06	1.15265e+06	1.34085e+06	3.70773e+06	4.99655e+06	4.19102e+06	12980.3	12101.3	14299.6	39312.8	52691.1	44585.4	14541.7	19802.9	14558.4	40035.2
24449	EM-3rep-phosp-Frac10.FTMS.HCD.24449.24449.4.RT_102.285_min_6137.1_s.dta	fLHVVTDAAGsPVNsIVGEVSPNSTSRGDSPSSDITVNPR	0.000662782	4454.09	0	BL_ORD_ID:12706	60	99	TcCLB.510297.10	hypothetical protein; conserved	hypothetical protein, conserved	metal ion binding	N/A	TcChr20-S:148692-149315(+)	207	TMT 6-plex on n-term peptide:1,phosphorylation of S:11,phosphorylation of S:15	4	4454.1	2.4854e-08	0	1115.03	1114.53	2	1114.53	0.967588	-0.324815	0	26276.3	18170.7	29119.2	40609.2	37449.2	34701.3	5.25526e+06	3.63414e+06	5.82384e+06	8.12183e+06	7.48984e+06	6.94026e+06	55670.2	38233.8	62269.2	86140.7	78941.1	73832.6	62366.8	62566.6	63396.4	87723.4
28910	EM-3rep-phosp-Frac7.FTMS.HCD.28910.28910.3.RT_121.442_min_7286.5_s.dta	vPASAQLLEEDsGGCGELPSLATFDCPTNFHAR	0.000271523	3990.79	0	BL_ORD_ID:17108	515	547	TcCLB.507143.40	hypothetical protein; conserved	hypothetical protein, conserved	N/A	N/A	TcChr3-S:158434-160770(+)	778	TMT 6-plex on n-term peptide:1,phosphorylation of S:12,NEM C:15,NEM C:26	3	3990.8	1.10388e-08	0	1331.94	1331.27	2	1331.28	0.82101	0.029509	16.0191	1229.62	0	848.888	2494.35	2090.08	2156.94	245924	84005.1	169778	498870	418016	431389	2605.13	840.051	1813.03	5290.99	4407.54	4589.24	2918.5	1374.68	1845.85	5388.2
16101	EM-3rep-phosp-Frac8.FTMS.HCD.16101.16101.3.RT_68.902_min_4134.1_s.dta	lqPAANAEALGAtNPKK	0.0428569	2461.36	0	BL_ORD_ID:5110	650	666	TcCLB.507629.30	hypothetical protein; conserved	Dpy-30 motif containing protein, putative	N/A	N/A	TcChr14-S:455603-458698(-)	1031	TMT 6-plex on n-term peptide:1,deamidation of N and Q:2,phosphorylation of T:13,TMT 6-plex on K:16,TMT 6-plex on K:17	3	2461.36	4.69613e-06	0	821.46	821.459	0	821.46	0.709252	-0.0383225	NaN	16759.3	12915.1	17283.3	16002.9	13700.3	14099	3.35187e+06	2.58302e+06	3.45666e+06	3.20058e+06	2.74007e+06	2.8198e+06	35507.1	27232.8	36978.3	33944.5	28864.7	29997.8	39778.3	44564.4	37647.7	34568.2
15438	EM-3rep-phosp-Frac8.FTMS.HCD.15438.15438.3.RT_66.306_min_3978.3_s.dta	lQPAANAEALGAtNPKK	9.67094e-07	2460.37	0	BL_ORD_ID:5110	650	666	TcCLB.507629.30	hypothetical protein; conserved	Dpy-30 motif containing protein, putative	N/A	N/A	TcChr14-S:455603-458698(-)	1031	TMT 6-plex on n-term peptide:1,phosphorylation of T:13,TMT 6-plex on K:16,TMT 6-plex on K:17	3	2460.37	1.33025e-10	0	821.467	821.131	1	821.132	1.70561	0.958036	NaN	38675.2	23590.1	43146.5	37149.6	28658.1	30221.7	7.73504e+06	4.71803e+06	8.6293e+06	7.42991e+06	5.73161e+06	6.04434e+06	81939	49706.9	92326.1	78805.5	60362.7	64301.5	91795.6	81341.4	93997.4	80253.5
10672	EM-3rep-phosp-Frac10.FTMS.HCD.10672.10672.4.RT_46.568_min_2794.1_s.dta	kAGDGEGEDEKEDETEATEAGmQsENGAR	0.159656	3822.7	0	BL_ORD_ID:5110	544	572	TcCLB.507629.30	hypothetical protein; conserved	Dpy-30 motif containing protein, putative	N/A	N/A	TcChr14-S:455603-458698(-)	1031	TMT 6-plex on K | TMT 6-plex on n-term peptide:1,TMT 6-plex on K:11,oxidation of M:22,phosphorylation of S:24	4	3822.7	1.08477e-05	0	956.934	956.682	1	956.683	1.37516	0.0827578	NaN	9785.59	7506.36	10576.3	7719.2	7353.94	6473.16	1.95712e+06	1.50127e+06	2.11526e+06	1.54384e+06	1.47079e+06	1.29463e+06	20732.2	15835.1	22630.8	16374.3	15490.8	13772.7	23226.1	25912.8	23040.4	16675.2
18777	EM-3rep-phosp-Frac9.FTMS.HCD.18777.18777.4.RT_79.069_min_4744.2_s.dta	fEHALHETPEEARSLDAEtSSVASTLER	0.00241758	3420.59	0	BL_ORD_ID:13830	808	835	TcCLB.510599.30	hypothetical protein; conserved	Component of IIS longevity pathway SMK-1, putative	N/A	N/A	TcChr31-S:145703-148474(+)	923	TMT 6-plex on n-term peptide:1,phosphorylation of T:19	4	3420.61	8.7778e-08	0	856.659	856.158	2	856.157	-0.978728	-1.98924	0	9034.72	7063.07	8915.85	7795.7	7039.09	7159.63	1.80694e+06	1.41261e+06	1.78317e+06	1.55914e+06	1.40782e+06	1.43193e+06	19141.4	14897.5	19075.9	16535.2	14830.3	15233.3	21443.9	24378.7	19421.2	16839
22078	EM-3rep-phosp-Frac8.FTMS.HCD.22078.22078.4.RT_92.435_min_5546.1_s.dta	iLPQQTAVLQTsPLTQATYSHVPR	0.0208749	2957.55	0	BL_ORD_ID:648	372	395	TcCLB.510057.4	hypothetical protein; conserved	EF-hand domain pair, putative	N/A	N/A	TcChr17-S:444239-445771(+)	511	TMT 6-plex on n-term peptide:1,phosphorylation of S:12	4	2957.56	1.32187e-06	0	740.9	740.397	2	740.398	2.33562	1.58805	0	8668.77	6048.54	7244.38	6396.8	5907.72	4564.7	1.73375e+06	1.20971e+06	1.44888e+06	1.27936e+06	1.18154e+06	912941	18366	12758.9	15499.3	13571	12447.2	9712.14	20575.3	20879	15779.8	13820.4
18660	EM-3rep-phosp-Frac7.FTMS.HCD.18660.18660.3.RT_80.244_min_4814.7_s.dta	hATEGNEAsLVCALTAR	0.0120291	2176.02	0	BL_ORD_ID:154	576	592	TcCLB.511109.70	hypothetical protein; conserved	GRIP-related Arf-binding domain containing protein, putative	N/A	N/A	TcChr23-S:292122-295208(-)	1028	TMT 6-plex on n-term peptide:1,phosphorylation of S:9,NEM C:12	3	2176.02	7.93372e-07	0	726.348	726.347	0	726.348	0.964653	0.173152	NaN	17062.1	13014.4	14586.5	12989.3	11759.7	13167.9	3.41242e+06	2.60289e+06	2.91729e+06	2.59786e+06	2.35194e+06	2.63359e+06	36148.5	27456.4	31207.9	27548.3	24776.6	28016.9	40496.9	44930.3	31772.8	28054.5
22489	EM-3rep-phosp-Frac8.FTMS.HCD.22489.22489.3.RT_94.096_min_5645.8_s.dta	sNLFVSGLHAsVTDNELYK	0.157299	2631.33	0	BL_ORD_ID:6536	237	255	TcCLB.506399.40	hypothetical protein; conserved	hypothetical protein, conserved	nucleic acid binding	N/A	TcChr26-S:289382-291187(-)	601	TMT 6-plex on n-term peptide:1,phosphorylation of S:11,TMT 6-plex on K:19	3	2631.33	6.74062e-06	0	878.454	878.119	1	878.119	0.339325	-0.40825	100	26100.9	15263.8	22500.5	32243.3	31412.4	31313.7	5.22018e+06	3.05277e+06	4.50011e+06	6.44865e+06	6.28248e+06	6.26274e+06	55298.5	32125.7	48110.1	68386.3	66220.1	66624.9	61950.5	52571.2	48981	69642.8
14391	EM-3rep-phosp-Frac9.FTMS.HCD.14391.14391.4.RT_61.795_min_3707.7_s.dta	fKAHDTESSsFSLLHGSAR	0.405332	2614.29	0	BL_ORD_ID:8738	7	25	TcCLB.504147.240	hypothetical protein; conserved	hypothetical protein, conserved	protein binding	N/A	TcChr37-S:547427-550978(+)	1183	TMT 6-plex on n-term peptide:1,TMT 6-plex on K:2,phosphorylation of S:10	4	2614.29	2.08022e-05	0	654.832	654.581	1	654.581	0.10357	-0.906942	35.2637	21886.4	17703.7	21607.3	20240.7	15693.9	16761.6	4.37729e+06	3.54074e+06	4.32147e+06	4.04814e+06	3.13879e+06	3.35232e+06	46369.6	37337.8	46233	42936	33060.8	35663	51947.4	61100.4	47069.9	43724.9
20631	EM-3rep-phosp-Frac10.FTMS.HCD.20631.20631.4.RT_86.783_min_5207.0_s.dta	qAEQAAATLSEDsVSNSAETLAQEAR	4.0466e-06	2985.38	0	BL_ORD_ID:1466	289	314	TcCLB.506213.100	hypothetical protein; conserved	TPR repeat, putative	protein binding	N/A	TcChr40-S:494843-496846(+)	667	TMT 6-plex on n-term peptide:1,phosphorylation of S:13	4	2985.38	1.90895e-10	0	747.604	747.351	1	747.353	1.63425	0.341843	0	11552.9	7989.11	11599	9358.32	8627.95	9632.42	2.31058e+06	1.59782e+06	2.31981e+06	1.87166e+06	1.72559e+06	1.92648e+06	24476.5	16848.3	24817.9	19847.3	18176.3	20494.5	27420.8	27571	25267.1	20212
16923	EM-3rep-phosp-Frac11.FTMS.HCD.16923.16923.5.RT_72.428_min_4345.7_s.dta	eLEGDDHNnNDDGmADsGVEDDDDDDENDDDDVDDNFKK	1.52669e-298	5156.02	0	BL_ORD_ID:17410	297	335	TcCLB.507809.100	hypothetical protein; conserved	hypothetical protein, conserved	protein binding	N/A	TcChr21-S:432980-437824(+)	1614	TMT 6-plex on n-term peptide:1,deamidation of N and Q:9,oxidation of M:14,phosphorylation of S:17,TMT 6-plex on K:38,TMT 6-plex on K:39	5	5156	4.81606e-301	0	1032.61	1032.21	2	1032.21	5.1475	4.06759	29.6259	20693.5	14079.4	20274.5	14833.5	17621.2	14500.3	4.1387e+06	2.81587e+06	4.0549e+06	2.96671e+06	3.52423e+06	2.90006e+06	43842.2	29699.6	43374.6	31461	37129.7	30851.7	49116	48601	44159.7	32039
28929	EM-3rep-phosp-Frac5.FTMS.HCD.28929.28929.3.RT_123.706_min_7422.3_s.dta	tVsELNSALLAVASTqR	0.0885968	2069.06	0	BL_ORD_ID:5410	125	141	TcCLB.510283.120	hypothetical protein; conserved	hypothetical protein, conserved	protein binding	N/A	TcChr16-S:267900-269588(+)	562	TMT 6-plex on n-term peptide:1,phosphorylation of S:3,deamidation of N and Q:16	3	2069.06	7.82657e-06	0	691.029	690.694	1	690.695	0.894311	-0.0389965	NaN	2956.23	2548.89	3793.07	4556.8	4326.97	4775.54	591245	509777	758614	911361	865395	955108	6263.19	5368.33	8112.44	9663.96	9120.08	10160.7	7016.6	8784.86	8259.28	9841.52
17944	EM-3rep-phosp-Frac8.FTMS.HCD.17944.17944.4.RT_75.961_min_4557.6_s.dta	nKsKDIVSVVLLHEPTGTR	0.00454099	2859.61	0	BL_ORD_ID:914	303	321	TcCLB.510525.50	hypothetical protein; conserved	hypothetical protein, conserved	protein binding	N/A	TcChr13-S:252438-254516(+)	692	TMT 6-plex on n-term peptide:1,TMT 6-plex on K:2,phosphorylation of S:3,TMT 6-plex on K:4	4	2859.62	9.34745e-07	0	716.163	715.912	1	715.912	0.502282	-0.245293	0	63413.8	49232	63621.6	61320.1	45702	46353.9	8.85544e+06	6.87502e+06	8.88446e+06	8.56306e+06	6.38207e+06	6.4731e+06	93807.6	72482.6	95050.7	90829.9	67221.2	68862.8	105092	118612	96771.3	92498.7
29983	EM-3rep-phosp-Frac7.FTMS.HCD.29983.29983.4.RT_125.821_min_7549.3_s.dta	eANLSDRsVQLNDVDLSCIAEALCSTAHSIR	3.38288e-07	3888.82	0	BL_ORD_ID:16136	156	186	TcCLB.511801.10	hypothetical protein; conserved	leucine rich repeat	protein binding	N/A	TcChr30-S:482114-484561(-)	815	TMT 6-plex on n-term peptide:1,phosphorylation of S:8,NEM C:18,NEM C:24	4	3888.82	1.21133e-11	0	973.716	973.213	2	973.214	0.993883	0.202382	NaN	1715.88	1060.34	1749.72	3756.06	2939.27	3308.36	343175	212068	349945	751212	587854	661671	3635.33	2224.89	3740.1	7967.18	6197.05	7039.05	4072.63	3640.86	3807.8	8113.57
20311	EM-3rep-phosp-Frac6.FTMS.HCD.20311.20311.3.RT_88.059_min_5283.5_s.dta	lVPLPStGSPIQYRPK	0.00298446	2290.29	0	BL_ORD_ID:5130	3376	3391	TcCLB.507099.40	hypothetical protein; conserved	Concanavalin A-like lectin/glucanases superfamily/SPRY domain/HECT-domain (ubiquitin-transferase), putative	protein binding, ubiquitin-protein transferase activity	N/A	TcChr14-S:495847-509118(-)	4423	TMT 6-plex on n-term peptide:1,phosphorylation of T:7,TMT 6-plex on K:16	3	2290.29	4.83626e-07	0	764.437	764.436	0	764.437	1.25458	0.444716	0	39724.3	22883.7	35353.7	29853.7	26787.2	33624.1	7.94486e+06	4.57673e+06	7.07073e+06	5.97073e+06	5.35744e+06	6.72481e+06	84161.6	48246	75643.3	63307.6	56433.3	71540.5	94285.6	78950.8	77012.6	64470.8
26273	EM-3rep-phosp-Frac9.FTMS.HCD.26273.26273.4.RT_109.370_min_6562.2_s.dta	kSDLFPPFLPSRVSIAsANsQAFTPPK	0.000394583	3748.95	0	BL_ORD_ID:6446	374	400	TcCLB.503885.100	hypothetical protein; conserved	hypothetical protein, conserved	protein kinase binding	N/A	TcChr26-S:168686-170212(+)	508	TMT 6-plex on K | TMT 6-plex on n-term peptide:1,phosphorylation of S:17,phosphorylation of S:20,TMT 6-plex on K:27	4	3748.96	1.95377e-08	0	938.75	938.247	2	938.248	0.570584	-0.439929	90.0246	13875.1	8551.94	12186.8	11660.8	8550.9	10635.3	2.77502e+06	1.71039e+06	2.43736e+06	2.33217e+06	1.71018e+06	2.12706e+06	29396.4	18027.9	26076.7	24733.6	18012.4	22628.3	32932.6	29501.3	26548.7	25188
21588	EM-3rep-phosp-Frac6.FTMS.HCD.21588.21588.4.RT_93.210_min_5592.6_s.dta	iFCAPPAALDKsPLPGTPVGSSHTK	0.00729801	3382.79	0	BL_ORD_ID:16784	64	88	TcCLB.503409.10	hypothetical protein; conserved	Pseudokinase, putative	protein phosphorylation/dephosphorylation	N/A	TcChr33-S:674263-676737(+)	824	TMT 6-plex on n-term peptide:1,NEM C:3,TMT 6-plex on K:11,phosphorylation of S:12,TMT 6-plex on K:25	4	3382.8	4.38214e-07	0	846.958	846.706	1	846.707	0.432635	-0.377225	0	9084.38	6023.68	8343.59	7066.38	6423.3	7925.98	1.81688e+06	1.20474e+06	1.66872e+06	1.41328e+06	1.28466e+06	1.5852e+06	19246.6	12703.4	17851.9	14985	13532.4	16863.8	21561.8	20788.1	18175	15260.4
29651	EM-3rep-phosp-Frac3.FTMS.HCD.29651.29651.2.RT_128.693_min_7721.6_s.dta	fILDLGNITTPyASPK	0.00382679	2287.23	0	BL_ORD_ID:6450	71	86	TcCLB.503551.20	hypothetical protein; conserved	hypothetical protein, conserved	protein phosphorylation/dephosphorylation	N/A	TcChr26-S:173998-176346(+)	782	TMT 6-plex on n-term peptide:1,phosphorylation of Y:12,TMT 6-plex on K:16	2	2287.23	2.35698e-07	0	1144.62	1144.62	0	1144.62	1.41571	0.77073	0	16892.6	12589.2	19184.6	16169.8	12967.8	10343.4	3.37852e+06	2.51784e+06	3.83691e+06	3.23397e+06	2.59356e+06	2.06867e+06	35789.4	26543.1	41051.2	34307.5	27314.9	22007.2	40094.5	43435.7	41794.3	34937.8
31043	EM-3rep-phosp-Frac9.FTMS.HCD.31043.31043.3.RT_128.778_min_7726.7_s.dta	tLQDANVVGTPAAsTESLTPLLDELELHAFNSNTSPR	9.62519e-10	4217.09	0	BL_ORD_ID:14510	334	370	TcCLB.508215.10	hypothetical protein; conserved	zinc finger CCCH domain containing protein 17	RNA biding	N/A	TcChr29-S:640755-641876(+)	373	TMT 6-plex on n-term peptide:1,phosphorylation of S:14	3	4217.07	2.2639e-14	0	1407.04	1406.7	1	1406.71	5.14937	4.13886	NaN	4797.14	3219.79	4746.96	7014.58	5647.8	7348.39	959428	643958	949391	1.40292e+06	1.12956e+06	1.46968e+06	10163.4	6775.71	10152	14876.3	11904.5	15634.9	11386	11087.9	10335.8	15149.7
15960	EM-3rep-phosp-Frac10.FTMS.HCD.15960.15960.3.RT_67.880_min_4072.8_s.dta	nINENEGQmEDIPsPPGGGGGNTK	2.63214e-06	2965.34	0	BL_ORD_ID:11068	466	489	TcCLB.510149.70	hypothetical protein; conserved	Zinc-finger double-stranded RNA-binding, putative	RNA biding	N/A	TcChr36-S:146580-148406(-)	608	TMT 6-plex on n-term peptide:1,oxidation of M:9,phosphorylation of S:14,TMT 6-plex on K:24	3	2965.35	1.00074e-10	0	990.125	989.458	2	989.456	-2.09544	-3.38785	NaN	19882.7	17342.6	23042.1	18007.2	16726	16211.1	3.97654e+06	3.46853e+06	4.60842e+06	3.60143e+06	3.34521e+06	3.24222e+06	42124.3	36584.4	49303	38195.2	35235	34491.7	47191.5	59867.6	50195.4	38896.9
15303	EM-3rep-phosp-Frac8.FTMS.HCD.15303.15303.3.RT_65.791_min_3947.5_s.dta	aLQGGSsGGGIIIHSSK	0.023132	2106.12	0	BL_ORD_ID:15704	457	473	TcCLB.511143.12	hypothetical protein; conserved	Microtubule-binding protein MIP-T3, putative	structural	N/A	TcChr10-S:413664-415454(-)	596	TMT 6-plex on n-term peptide:1,phosphorylation of S:7,TMT 6-plex on K:17	3	2106.12	2.48438e-06	0	703.049	703.049	0	703.049	-0.130347	-0.877922	NaN	66191.6	51656.6	71934.7	37544.4	45166	23029.2	4.43728e+06	3.4629e+06	4.82228e+06	2.51686e+06	3.02779e+06	1.54381e+06	47005.1	36549.2	51596.3	26700.8	31884.3	16423.5	52659.4	59810	52530.3	27191.4
25420	EM-3rep-phosp-Frac8.FTMS.HCD.25420.25420.3.RT_105.933_min_6356.0_s.dta	aSIVFELEPGTDsGSK	0.10458	2174.09	0	BL_ORD_ID:17654	117	132	TcCLB.511871.100	hypothetical protein; conserved	Flagellum attachment zone protein 13	structural	N/A	TcChr15-S:93601-95541(+)	646	TMT 6-plex on n-term peptide:1,phosphorylation of S:13,TMT 6-plex on K:16	3	2174.09	7.35079e-06	0	726.04	725.704	1	725.705	1.21475	0.46718	0	6335.5	4834.62	7353.23	5600.16	5929.42	5307.68	1.2671e+06	966925	1.47065e+06	1.12003e+06	1.18588e+06	1.06154e+06	13422.7	10196.1	15732.3	11878	12492.7	11292.9	15037.3	16685.1	16017.1	12096.2
11557	EM-3rep-phosp-Frac8.FTMS.HCD.11557.11557.3.RT_51.089_min_3065.3_s.dta	lHMSAPTGsEDHLR	0.512707	1858.86	0	BL_ORD_ID:17654	134	147	TcCLB.511871.100	hypothetical protein; conserved	Flagellum attachment zone protein 13	structural	N/A	TcChr15-S:93601-95541(+)	646	TMT 6-plex on n-term peptide:1,phosphorylation of S:9	3	1858.86	5.47062e-05	0	620.627	620.627	0	620.627	0.174127	-0.573447	NaN	8309.13	7109.56	8148.49	6376.46	6534.39	5433.93	1.66183e+06	1.42191e+06	1.6297e+06	1.27529e+06	1.30688e+06	1.08679e+06	17604.1	15002.2	17433.9	13525.9	13767.2	11561.5	19721.7	24549.9	17749.4	13774.4
16124	EM-3rep-phosp-Frac10.FTMS.HCD.16124.16124.5.RT_68.545_min_4112.7_s.dta	rNsNPFFVGVLNPGNGNENHHK	0.00330224	2985.48	0	BL_ORD_ID:11698	1175	1196	TcCLB.503697.130	hypothetical protein; conserved	hypothetical protein, conserved	Unknown function	N/A	TcChr36-S:1023598-1027260(-)	1220	TMT 6-plex on n-term peptide:1,phosphorylation of S:3,TMT 6-plex on K:22	5	2985.47	1.57873e-07	0	598.103	598.103	0	598.103	0.658904	-0.633499	NaN	9981.4	7979.56	9633.38	9224.24	6321.26	6845.12	1.99628e+06	1.59591e+06	1.92668e+06	1.84485e+06	1.26425e+06	1.36902e+06	21147	16828.7	20614	19568.9	13314.2	14564.1	23690.9	27538.9	20987.1	19928.5
11236	EM-3rep-phosp-Frac9.FTMS.HCD.11236.11236.3.RT_49.310_min_2958.6_s.dta	qGsGLAGVAGNHK	0.126009	1732.9	0	BL_ORD_ID:11086	556	568	TcCLB.503811.80	hypothetical protein; conserved	hypothetical protein, conserved	Unknown function	N/A	TcChr36-S:167260-169125(-)	621	TMT 6-plex on n-term peptide:1,phosphorylation of S:3,TMT 6-plex on K:13	3	1732.9	1.93533e-05	0	578.642	578.642	0	578.642	0.45955	-0.550963	NaN	36987.3	31028.9	34432.2	29046.1	25299.6	27330.9	7.39745e+06	6.20578e+06	6.88643e+06	5.80921e+06	5.05991e+06	5.46619e+06	78362.8	65470	73673.5	61607.2	53296.9	58150.9	87789.2	107136	75007.1	62739.1
30809	EM-3rep-phosp-Frac5.FTMS.HCD.30809.30809.3.RT_131.178_min_7870.7_s.dta	aALDEVTAFLLQQTTAPDFsGMTPTLSR	1.18255e-09	3289.61	0	BL_ORD_ID:10768	120	147	TcCLB.503855.60	hypothetical protein; conserved	hypothetical protein, conserved	Unknown function	N/A	TcChr8-S:130083-131156(-)	357	TMT 6-plex on n-term peptide:1,phosphorylation of S:20	3	3289.61	3.02412e-14	0	1097.88	1097.55	1	1097.55	1.22853	0.295225	0	15340.6	9660.61	14739.1	18769.1	16910	20284.5	3.06812e+06	1.93212e+06	2.94782e+06	3.75381e+06	3.382e+06	4.0569e+06	32501.2	20340	31523.1	39803.6	35641.9	43158.5	36410.9	33284.8	32093.7	40534.9
23876	EM-3rep-phosp-Frac7.FTMS.HCD.23876.23876.4.RT_100.985_min_6059.1_s.dta	dHEAEGKDGFAEELsPLQALIR	0.0001057	2962.48	0	BL_ORD_ID:3862	492	513	TcCLB.504153.240	hypothetical protein; conserved	hypothetical protein, conserved	Unknown function	N/A	TcChr39-S:712304-713992(-)	562	TMT 6-plex on n-term peptide:1,TMT 6-plex on K:7,phosphorylation of S:15	4	2962.49	4.48526e-09	0	741.628	741.628	0	741.628	0.00321104	-0.78829	NaN	17417.1	13875.1	20821.4	14692	16031.3	13137.1	1.12931e+06	899657	1.35005e+06	952621	1.03946e+06	851803	11963.1	9488.75	14442.8	10103.1	10949.6	9061.73	13402.1	15527.6	14704.2	10288.8
28399	EM-3rep-phosp-Frac9.FTMS.HCD.28399.28399.5.RT_118.026_min_7081.6_s.dta	vCQQLNTTNAALTTNAQTLLGQLNVEHYGIEGAPsEK	0.00166066	4589.28	0	BL_ORD_ID:3868	250	286	TcCLB.504153.280	hypothetical protein; conserved	hypothetical protein, conserved	Unknown function	N/A	TcChr39-S:723569-724801(-)	410	TMT 6-plex on n-term peptide:1,NEM C:2,phosphorylation of S:35,TMT 6-plex on K:37	5	4589.29	7.12271e-08	0	919.267	918.865	2	918.866	1.17757	0.167062	89.8176	15645.4	9987.33	13236.9	12581.5	9090.62	11373.3	3.12908e+06	1.99747e+06	2.64738e+06	2.5163e+06	1.81812e+06	2.27466e+06	33147.1	21058.4	28324	26686.7	19148.7	24198.5	37134.4	34460.5	28836.7	27177
27421	EM-3rep-phosp-Frac11.FTMS.HCD.27421.27421.3.RT_115.186_min_6911.2_s.dta	hVDLLDDLFGGPPPPQsPTAQPSEQAALK	1.06937e-05	3562.81	0	BL_ORD_ID:13224	457	485	TcCLB.504427.140	hypothetical protein; conserved	hypothetical protein, conserved	Unknown function	N/A	TcChr22-S:304841-307639(+)	932	TMT 6-plex on n-term peptide:1,phosphorylation of S:17,TMT 6-plex on K:29	3	3562.81	2.9261e-10	0	1188.95	1188.61	1	1188.61	0.41832	-0.661585	NaN	6276.64	5595.8	6614.4	11214.6	10745.2	12992.8	1.25533e+06	1.11916e+06	1.32288e+06	2.24292e+06	2.14904e+06	2.59857e+06	13298	11780.2	14139.3	23780.9	22654.3	27644.3	14897.6	19277.3	14395.3	24217.8
20955	EM-3rep-phosp-Frac9.FTMS.HCD.20955.20955.3.RT_87.830_min_5269.8_s.dta	fPTGVLGsGSGGITGAAAAAGGGRK	0.00016317	2654.39	0	BL_ORD_ID:13242	695	719	TcCLB.504427.270	hypothetical protein; conserved	hypothetical protein, conserved	Unknown function	N/A	TcChr22-S:341572-344160(-)	862	TMT 6-plex on n-term peptide:1,phosphorylation of S:8,TMT 6-plex on K:25	3	2654.39	8.6567e-09	0	886.141	885.806	1	885.806	0.953352	-0.0571598	0	59770.2	49741.6	78506.2	61476.7	47166.9	53997.4	1.1954e+07	9.94833e+06	1.57012e+07	1.22953e+07	9.43338e+06	1.07995e+07	126632	104886	168001	130402	99331	114888	141865	171638	171042	132798
15452	EM-3rep-phosp-Frac7.FTMS.HCD.15452.15452.3.RT_67.549_min_4053.0_s.dta	sLPAVAHVPPPsPK	4.50416e-05	1934.07	0	BL_ORD_ID:13242	227	240	TcCLB.504427.270	hypothetical protein; conserved	hypothetical protein, conserved	Unknown function	N/A	TcChr22-S:341572-344160(-)	862	TMT 6-plex on n-term peptide:1,phosphorylation of S:12,TMT 6-plex on K:14	3	1934.08	8.89271e-09	0	646.035	645.7	1	645.701	0.0544	-0.737101	46.5867	16351.7	11952.5	15494.1	15123.2	11100.1	11293.5	3.27034e+06	2.3905e+06	3.09883e+06	3.02464e+06	2.22002e+06	2.25869e+06	34643.4	25201.7	33153	32083.2	23383	24028.6	38810.7	41240.7	33753.1	32672.6
16356	EM-3rep-phosp-Frac9.FTMS.HCD.16356.16356.4.RT_69.489_min_4169.3_s.dta	iLHPGnHTIRVTPTGGtAYNGTVGESWTAPR	4.22369e-05	3569.77	0	BL_ORD_ID:12370	173	203	TcCLB.506163.30	hypothetical protein; conserved	hypothetical protein, conserved	Unknown function	N/A	TcChr30-S:145770-146531(-)	253	TMT 6-plex on n-term peptide:1,deamidation of N and Q:6,phosphorylation of T:17	4	3569.76	1.3345e-09	0	893.702	893.448	1	893.451	3.84036	2.82985	NaN	13842.6	10762.5	13369.7	11780.9	10091.4	11154	2.76851e+06	2.1525e+06	2.67394e+06	2.35619e+06	2.01827e+06	2.2308e+06	29327.4	22700.9	28606.2	24987.4	21259.6	23731.9	32855.3	37148.2	29124	25446.5
16407	EM-3rep-phosp-Frac10.FTMS.HCD.16407.16407.4.RT_69.691_min_4181.5_s.dta	iLHPGNHTIRVtPTGGTAYNGTVGESWTAPR	0.000866651	3568.77	0	BL_ORD_ID:12370	173	203	TcCLB.506163.30	hypothetical protein; conserved	hypothetical protein, conserved	Unknown function	N/A	TcChr30-S:145770-146531(-)	253	TMT 6-plex on n-term peptide:1,phosphorylation of T:12	4	3568.78	2.71032e-08	0	893.453	893.202	1	893.202	0.799188	-0.493215	NaN	62999.4	30433.9	57749.8	41270.8	36109.2	33586.2	1.25999e+07	6.08678e+06	1.155e+07	8.25417e+06	7.22184e+06	6.71723e+06	133473	64157.2	123580	87548	76049.4	71459.9	149529	104988	125817	89156.6
15882	EM-3rep-phosp-Frac10.FTMS.HCD.15882.15882.4.RT_67.563_min_4053.8_s.dta	hQHSPsAPFSQNFTPIQNSNSNNAAVAANTAVSSR	1.02009e-05	3959.85	0	BL_ORD_ID:4816	582	616	TcCLB.506181.70	hypothetical protein; conserved	hypothetical protein, conserved	Unknown function	N/A	TcChr14-S:73828-78132(-)	1434	TMT 6-plex on n-term peptide:1,phosphorylation of S:6	4	3959.85	4.06717e-10	0	991.221	990.97	1	990.971	0.688941	-0.603462	100	22079.8	15679.8	17247.8	16775.2	12778.3	14211.9	4.41595e+06	3.13596e+06	3.44957e+06	3.35504e+06	2.55567e+06	2.84239e+06	46779.1	33074.5	36904.4	35584.1	26919.6	30238.2	52406.3	54123.8	37572.5	36237.9
15839	EM-3rep-phosp-Frac9.FTMS.HCD.15839.15839.4.RT_67.472_min_4048.3_s.dta	eAQLHIPPVIGRtPTAQAR	0.0448741	2363.26	0	BL_ORD_ID:1384	143	161	TcCLB.506211.20	hypothetical protein; conserved	hypothetical protein, conserved	Unknown function	N/A	TcChr40-S:401425-402687(-)	420	TMT 6-plex on n-term peptide:1,phosphorylation of T:13	4	2363.27	5.44456e-06	0	592.075	591.824	1	591.825	0.64657	-0.363943	NaN	20105	16394.7	20810.3	19528.2	12638.3	16915.7	4.021e+06	3.27893e+06	4.16207e+06	3.90564e+06	2.52766e+06	3.38315e+06	42595.4	34573.4	44533.2	41423	26616.1	35990.9	47719.2	56576.7	45339.3	42184
26280	EM-3rep-phosp-Frac11.FTMS.HCD.26280.26280.4.RT_110.524_min_6631.5_s.dta	lSFLDSFRSsGGGsFVSQDESLGINPDETHTR	0.132059	3830.68	0	BL_ORD_ID:6538	437	468	TcCLB.506399.30	hypothetical protein; conserved	hypothetical protein, conserved	Unknown function	N/A	TcChr26-S:292151-293980(-)	609	TMT 6-plex on n-term peptide:1,phosphorylation of S:10,phosphorylation of S:14	4	3830.7	9.22781e-06	0	959.435	958.683	3	958.682	-0.733915	-1.81382	0	4010.37	2804.07	4138.07	6390.44	8418.7	8766.07	802075	560814	827613	1.27809e+06	1.68374e+06	1.75321e+06	8496.56	5899.62	8841.95	13548	17751.6	18651.2	9518.62	9654.27	9002	13796.9
17291	EM-3rep-phosp-Frac10.FTMS.HCD.17291.17291.3.RT_73.269_min_4396.1_s.dta	sSGGGSFVSqDEsLGINPDETHTR	0.000140346	2786.23	0	BL_ORD_ID:6538	445	468	TcCLB.506399.30	hypothetical protein; conserved	hypothetical protein, conserved	Unknown function	N/A	TcChr26-S:292151-293980(-)	609	TMT 6-plex on n-term peptide:1,deamidation of N and Q:10,phosphorylation of S:13	3	2786.22	6.5847e-09	0	930.083	929.748	1	929.749	0.641312	-0.651092	50.0494	36028.1	28048.6	36949.9	32194.8	26144.9	29291.6	7.20562e+06	5.60971e+06	7.38997e+06	6.43895e+06	5.22897e+06	5.85833e+06	76330.7	59154.9	79062.8	68287.9	55074.5	62322.7	85512.6	96802.4	80493.9	69542.6
24093	EM-3rep-phosp-Frac7.FTMS.HCD.24093.24093.4.RT_101.862_min_6111.7_s.dta	eGVLLMDGtPAQQPLEPPK	0.0897736	2557.32	0	BL_ORD_ID:746	66	84	TcCLB.506513.180	hypothetical protein; conserved	hypothetical protein, conserved	Unknown function	N/A	TcChr17-S:569846-571582(+)	578	TMT 6-plex on n-term peptide:1,phosphorylation of T:9,TMT 6-plex on K:19	4	2557.33	6.63319e-06	0	640.59	640.339	1	640.339	0.0162435	-0.775258	NaN	1755.07	1298.56	2168.04	3152.99	2424.44	2465.12	351015	259711	433608	630598	484887	493025	3718.38	2731.22	4637.01	6688.68	5109.95	5244.94	4165.67	4469.43	4720.95	6811.58
19183	EM-3rep-phosp-Frac4.FTMS.HCD.19183.19183.4.RT_85.505_min_5130.3_s.dta	kVSSVHLVEsPFVEELK	0.0225637	2693.5	0	BL_ORD_ID:746	291	307	TcCLB.506513.180	hypothetical protein; conserved	hypothetical protein, conserved	Unknown function	N/A	TcChr17-S:569846-571582(+)	578	TMT 6-plex on K | TMT 6-plex on n-term peptide:1,phosphorylation of S:10,TMT 6-plex on K:17	4	2693.5	3.42809e-06	0	674.634	674.383	1	674.383	0.406901	-0.393191	0	13887.2	10951	16041.4	11964.6	11282.1	10837	2.77744e+06	2.19021e+06	3.20828e+06	2.39293e+06	2.25641e+06	2.1674e+06	29422	23098.6	34324.4	25378.1	23765.6	23057.4	32961.2	37799.1	34945.8	25844.4
14885	EM-3rep-phosp-Frac9.FTMS.HCD.14885.14885.4.RT_63.728_min_3823.7_s.dta	aKEEVVSQLStSPGGSQHLSSK	3.47045e-08	3022.59	0	BL_ORD_ID:746	496	517	TcCLB.506513.180	hypothetical protein; conserved	hypothetical protein, conserved	Unknown function	N/A	TcChr17-S:569846-571582(+)	578	TMT 6-plex on n-term peptide:1,TMT 6-plex on K:2,phosphorylation of T:11,TMT 6-plex on K:22	4	3022.59	2.00049e-12	0	757.158	756.656	2	756.657	0.994091	-0.0164217	3.48564	25624	18877	27285.4	19276.3	17034.4	11811.2	3.98516e+06	2.93584e+06	4.24355e+06	2.99793e+06	2.64926e+06	1.83693e+06	42215.7	30967	45404.3	31804.5	27897.9	19541.8	47293.9	50675	46226.1	32388.8
14866	EM-3rep-phosp-Frac9.FTMS.HCD.14866.14866.4.RT_63.655_min_3819.3_s.dta	aKEEVVSqLStSPGGSQHLSSK	1.54014e-06	3023.58	0	BL_ORD_ID:746	496	517	TcCLB.506513.180	hypothetical protein; conserved	hypothetical protein, conserved	Unknown function	N/A	TcChr17-S:569846-571582(+)	578	TMT 6-plex on n-term peptide:1,TMT 6-plex on K:2,deamidation of N and Q:8,phosphorylation of T:11,TMT 6-plex on K:22	4	3023.58	8.53498e-11	0	757.407	756.902	2	756.906	4.98829	3.97778	NaN	20892.6	18483.3	22562.5	15075.3	15655.1	9996.33	4.17851e+06	3.69665e+06	4.51251e+06	3.01506e+06	3.13102e+06	1.99927e+06	44263.9	39009	48278.5	31984.4	32976.7	21268.8	49588.5	63835.2	49152.4	32572.1
15420	EM-3rep-phosp-Frac8.FTMS.HCD.15420.15420.4.RT_66.235_min_3974.1_s.dta	rKsAIDATADITDTVK	0.402823	2471.36	0	BL_ORD_ID:756	324	339	TcCLB.506513.90	hypothetical protein; conserved	Centrosomal protein of 120 kDa, putative	Unknown function	N/A	TcChr17-S:593698-594948(+)	416	TMT 6-plex on n-term peptide:1,TMT 6-plex on K:2,phosphorylation of S:3,TMT 6-plex on K:16	4	2471.36	5.88836e-05	0	619.099	618.847	1	618.848	0.633541	-0.114034	58.6278	28854.9	23063.1	33236.5	29009	26439.7	23665.7	5.77099e+06	4.61261e+06	6.64731e+06	5.80181e+06	5.28793e+06	4.73313e+06	61133.3	48629	71110.7	61536.8	55704.8	50352.5	68487.2	79577.6	72397.9	62667.5
9892	EM-3rep-phosp-Frac10.FTMS.HCD.9892.9892.4.RT_43.431_min_2605.9_s.dta	rAAAAAAAAEsDDENNKDNNGEEEEK	1.22533e-07	3485.61	0	BL_ORD_ID:6076	44	69	TcCLB.506529.170	hypothetical protein; conserved	hypothetical protein, conserved	Unknown function	N/A	TcChr6-S:64990-66909(-)	639	TMT 6-plex on n-term peptide:1,phosphorylation of S:11,TMT 6-plex on K:17,TMT 6-plex on K:26	4	3485.62	4.66526e-12	0	872.663	872.411	1	872.412	1.33536	0.0429543	NaN	11682.1	7258.7	12477.6	10407.8	6426.73	6816.11	2.33641e+06	1.45174e+06	2.49553e+06	2.08156e+06	1.28535e+06	1.36322e+06	24750.1	15299.4	26704.2	22081.8	13530.3	14502.4	27727.4	25036.3	27187.6	22487.6
8702	EM-3rep-phosp-Frac10.FTMS.HCD.8702.8702.5.RT_38.661_min_2319.6_s.dta	rAAAAAAAAEsDDENNKDNNGEEEEKR	0.480479	3641.72	0	BL_ORD_ID:6076	44	70	TcCLB.506529.170	hypothetical protein; conserved	hypothetical protein, conserved	Unknown function	N/A	TcChr6-S:64990-66909(-)	639	TMT 6-plex on n-term peptide:1,phosphorylation of S:11,TMT 6-plex on K:17,TMT 6-plex on K:26	5	3641.72	2.00291e-05	0	729.552	729.351	1	729.351	1.08	-0.212399	35.743	10878	7727.86	8052.76	6737.94	5010.31	4440.16	2.1756e+06	1.54557e+06	1.61055e+06	1.34759e+06	1.00206e+06	888032	23046.6	16307.7	17232.3	14295.6	10552.1	9447.15	25818.9	26686.3	17544.2	14558.2
25149	EM-3rep-phosp-Frac9.FTMS.HCD.25149.25149.3.RT_104.799_min_6287.9_s.dta	eQVqTLQALLQGsPQR	0.101111	2105.07	0	BL_ORD_ID:12672	236	251	TcCLB.506677.30	hypothetical protein; conserved	hypothetical protein, conserved	Unknown function	N/A	TcChr20-S:121373-122128(+)	251	TMT 6-plex on n-term peptide:1,deamidation of N and Q:4,phosphorylation of S:13	3	2105.07	7.77297e-06	0	702.699	702.698	0	702.699	1.34054	0.330026	0	6382.93	4018.16	3798.39	13248.8	21190.3	20508.3	1.27659e+06	803631	759678	2.64976e+06	4.23807e+06	4.10166e+06	13523.1	8435.67	8085.75	28082.8	44696.8	43634.7	15149.9	13804.3	8232.11	28598.8
23334	EM-3rep-phosp-Frac9.FTMS.HCD.23334.23334.4.RT_97.442_min_5846.5_s.dta	qMLQETANGGCDDEEVSGTsVDKVDSIFALRR	9.1719e-05	4132.94	0	BL_ORD_ID:12672	24	55	TcCLB.506677.30	hypothetical protein; conserved	hypothetical protein, conserved	Unknown function	N/A	TcChr20-S:121373-122128(+)	251	TMT 6-plex on n-term peptide:1,NEM C:11,phosphorylation of S:20,TMT 6-plex on K:23	4	4132.95	3.5462e-09	0	1034.75	1034.24	2	1034.25	0.760161	-0.250351	93.0565	23540.9	18683.8	22573.3	21101.5	15807.2	18184.2	4.70819e+06	3.73677e+06	4.51466e+06	4.2203e+06	3.16143e+06	3.63684e+06	49874.9	39406.1	48301.2	44760.4	33297.5	38689.8	55874.4	64485	49175.5	45582.8
21009	EM-3rep-phosp-Frac9.FTMS.HCD.21009.21009.5.RT_88.050_min_5283.0_s.dta	hVTPIPAVLAVEGVSSLSQPAEmPHsSPLISGVTRPKPAPR	1.13021e-08	4763.55	0	BL_ORD_ID:3920	272	312	TcCLB.506811.40	hypothetical protein; conserved	hypothetical protein, conserved	Unknown function	N/A	TcChr39-S:792078-795329(-)	1083	TMT 6-plex on n-term peptide:1,oxidation of M:23,phosphorylation of S:26,TMT 6-plex on K:37	5	4763.56	1.32251e-12	0	954.121	953.719	2	953.72	0.683355	-0.327157	100	14172.9	11148	14561.3	11786.4	12184.2	11690.3	2.83457e+06	2.22959e+06	2.91226e+06	2.35728e+06	2.43684e+06	2.33806e+06	30027.3	23515.8	31153	24997.8	25672.2	24872.9	33639.3	38481.8	31716.9	25457.1
30196	EM-3rep-phosp-Frac10.FTMS.HCD.30196.30196.4.RT_125.750_min_7545.0_s.dta	tALPDGVVEQHPEYFSVLSPPPILSIASAGCNIsSEDVDRETYGNDSSANR	1.8349e-11	5837.71	0	BL_ORD_ID:9790	653	703	TcCLB.506825.150	hypothetical protein; conserved	hypothetical protein, conserved	Unknown function	N/A	TcChr27-S:642706-644904(+)	732	TMT 6-plex on n-term peptide:1,NEM C:31,phosphorylation of S:34	4	5837.72	1.55711e-15	0	1460.94	1460.44	2	1460.44	-0.628578	-1.92098	NaN	8595.81	6095.54	8268.24	6813.21	7242.74	6848.08	1.71916e+06	1.21911e+06	1.65365e+06	1.36264e+06	1.44855e+06	1.36962e+06	18211.5	12856.4	17688.7	14449.9	15261.4	14570.4	20402.1	21038.5	18008.9	14715.4
22812	EM-3rep-phosp-Frac5.FTMS.HCD.22812.22812.4.RT_99.134_min_5948.0_s.dta	lCIPEGPmTVEKIsPLNK	0.147367	2876.53	0	BL_ORD_ID:4096	195	212	TcCLB.506885.354	hypothetical protein; conserved	hypothetical protein, conserved	Unknown function	N/A	TcChr39-S:1002423-1003091(-)	222	TMT 6-plex on n-term peptide:1,NEM C:2,oxidation of M:8,TMT 6-plex on K:12,phosphorylation of S:14,TMT 6-plex on K:18	4	2876.54	1.19791e-05	0	720.644	720.142	2	720.142	-0.00514377	-0.938451	0	34665	25251.8	36986.3	35802.1	24670.6	30057.3	6.933e+06	5.05036e+06	7.39725e+06	7.16042e+06	4.93412e+06	6.01146e+06	73442.8	53225.9	79144.1	75945.1	51964.1	63951.7	82277.3	87100	80576.7	77340.5
30785	EM-3rep-phosp-Frac8.FTMS.HCD.30785.30785.3.RT_127.766_min_7665.9_s.dta	qSVPVSQELsFIYDLK	0.000507905	2390.25	0	BL_ORD_ID:3454	30	45	TcCLB.506925.110	hypothetical protein; conserved	hypothetical protein, conserved	Unknown function	N/A	TcChr39-S:150547-151371(-)	274	TMT 6-plex on n-term peptide:1,phosphorylation of S:10,TMT 6-plex on K:16	3	2390.25	3.83006e-08	0	798.094	797.759	1	797.759	0.700539	-0.0470359	NaN	5053.09	3565.74	4869.38	4589.83	3114.17	4172.38	1.01062e+06	713148	973877	917967	622834	834476	10705.7	7517.98	10419.9	9735.45	6558.99	8877.41	11993.5	12302.6	10608.5	9914.32
21837	EM-3rep-phosp-Frac4.FTMS.HCD.21837.21837.2.RT_96.054_min_5763.2_s.dta	iLSIDSSSsPLSK	0.0156967	1871.01	0	BL_ORD_ID:3142	68	80	TcCLB.506945.10	hypothetical protein; conserved	hypothetical protein, conserved	Unknown function	N/A	TcChr32-S:888161-889132(+)	323	TMT 6-plex on n-term peptide:1,phosphorylation of S:9,TMT 6-plex on K:13	2	1871.01	1.50683e-06	0	936.511	936.51	0	936.511	0.835817	0.0357244	NaN	200683	158795	225406	190079	168590	170618	3.59659e+07	2.8459e+07	4.03968e+07	3.40655e+07	3.02144e+07	3.05778e+07	380995	300071	432173	361285	318261	325295	426826	491043	439996	367923
30846	EM-3rep-phosp-Frac8.FTMS.HCD.30846.30846.4.RT_128.016_min_7681.0_s.dta	iLSIDsSSSPLsKSLSGDELLTVSHVLHELGK	0.487851	4195.2	0	BL_ORD_ID:3142	68	99	TcCLB.506945.10	hypothetical protein; conserved	hypothetical protein, conserved	Unknown function	N/A	TcChr32-S:888161-889132(+)	323	TMT 6-plex on n-term peptide:1,phosphorylation of S:6,phosphorylation of S:12,TMT 6-plex on K:13,TMT 6-plex on K:32	4	4195.2	2.32842e-05	0	1050.06	1049.81	1	1049.81	0.580462	-0.167113	NaN	6324.71	3557.96	6251.62	4582.54	3464.35	4403.08	1.26494e+06	711592	1.25033e+06	916507	692870	880616	13399.8	7501.57	13379	9719.43	7294.64	9368.25	15011.7	12275.7	13621.1	9898.01
27445	EM-3rep-phosp-Frac10.FTMS.HCD.27445.27445.5.RT_114.494_min_6869.6_s.dta	vPYQFYQMHPQVPPLAPVPPQAGAYQTsPNPDLYQIAAQK	0.000412732	4987.52	0	BL_ORD_ID:3190	309	348	TcCLB.506945.260	hypothetical protein; conserved	hypothetical protein, conserved	Unknown function	N/A	TcChr32-S:932501-933628(+)	375	TMT 6-plex on n-term peptide:1,phosphorylation of S:28,TMT 6-plex on K:40	5	4987.52	2.1709e-08	0	998.914	998.511	2	998.512	1.33645	0.0440464	NaN	8913.37	4715.88	8512.55	11673.1	9730.74	12102.5	1.78267e+06	943176	1.70251e+06	2.33462e+06	1.94615e+06	2.4205e+06	18884.3	9917.81	18206.2	24756.3	20509.8	25750	21155.9	16229.7	18535.8	25211.1
19209	EM-3rep-phosp-Frac10.FTMS.HCD.19209.19209.4.RT_81.027_min_4861.6_s.dta	iANQQsSSPRPGTnVGAAPFIPGGK	0.00847846	2989.54	0	BL_ORD_ID:3190	349	373	TcCLB.506945.260	hypothetical protein; conserved	hypothetical protein, conserved	Unknown function	N/A	TcChr32-S:932501-933628(+)	375	TMT 6-plex on n-term peptide:1,phosphorylation of S:6,deamidation of N and Q:14,TMT 6-plex on K:25	4	2989.54	4.32288e-07	0	748.896	748.393	2	748.395	2.19392	0.90152	NaN	20824.4	16892.3	23255	21130.1	16786.9	16798.2	4.16489e+06	3.37847e+06	4.65101e+06	4.22603e+06	3.35739e+06	3.35963e+06	44119.6	35618.4	49758.8	44824.3	35363	35740.8	49426.8	58286.8	50659.5	45647.9
18566	EM-3rep-phosp-Frac10.FTMS.HCD.18566.18566.3.RT_78.431_min_4705.9_s.dta	iANQQSSsPRPGTNVGAAPFIPGGK	9.74844e-05	2988.56	0	BL_ORD_ID:3190	349	373	TcCLB.506945.260	hypothetical protein; conserved	hypothetical protein, conserved	Unknown function	N/A	TcChr32-S:932501-933628(+)	375	TMT 6-plex on n-term peptide:1,phosphorylation of S:8,TMT 6-plex on K:25	3	2988.56	4.085e-09	0	997.529	997.194	1	997.195	1.42473	0.132327	NaN	159047	137428	158506	146488	95783.2	88389.4	3.18095e+07	2.74857e+07	3.17012e+07	2.92977e+07	1.91567e+07	1.76779e+07	336965	289889	339198	310816	201717	188063	377499	474381	345338	316527
9066	EM-3rep-phosp-Frac9.FTMS.HCD.9066.9066.4.RT_40.725_min_2443.5_s.dta	kQDGHQDsPLEK	0.0105076	2148.12	0	BL_ORD_ID:4302	210	221	TcCLB.507011.100	hypothetical protein; conserved	hypothetical protein, conserved	Unknown function	N/A	TcChr39-S:1356100-1358361(+)	753	TMT 6-plex on K | TMT 6-plex on n-term peptide:1,phosphorylation of S:8,TMT 6-plex on K:12	4	2148.12	1.16041e-06	0	538.037	538.037	0	538.037	0.281095	-0.729417	NaN	25671.1	18319.8	22456.8	19550.4	19739.7	18453.5	4.06382e+06	2.9001e+06	3.55499e+06	3.0949e+06	3.12487e+06	2.92126e+06	43049	30587	38026.8	32821.6	32922.6	31077.3	48227.4	50053.3	38715.1	33424.6
20875	EM-3rep-phosp-Frac8.FTMS.HCD.20875.20875.3.RT_87.614_min_5256.8_s.dta	nTECWDNVVAEsPLHLTDRR	0.0447195	2788.28	0	BL_ORD_ID:9158	345	364	TcCLB.507639.60	hypothetical protein; conserved	hypothetical protein, conserved	Unknown function	N/A	TcChr37-S:1122312-1124561(-)	749	TMT 6-plex on n-term peptide:1,NEM C:4,phosphorylation of S:12	3	2788.28	1.57852e-06	0	930.77	930.435	1	930.436	0.277331	-0.470244	0	7835.82	4633.43	9636.41	12714.9	11264.6	11451.1	1.56716e+06	926687	1.92728e+06	2.54297e+06	2.25293e+06	2.29022e+06	16601.3	9738.82	20609.3	26969.6	23743.3	24364	18598.3	15936.8	20982.3	27465.1
24523	EM-3rep-phosp-Frac7.FTMS.HCD.24523.24523.3.RT_103.605_min_6216.3_s.dta	sMsPLSATSSLLPSSK	0.475581	2130.1	0	BL_ORD_ID:20642	1537	1552	TcCLB.507867.80	hypothetical protein; conserved	hypothetical protein, conserved	Unknown function	N/A	TcChr28-S:639218-645001(+)	1927	TMT 6-plex on n-term peptide:1,phosphorylation of S:3,TMT 6-plex on K:16	3	2130.11	4.00321e-05	0	711.378	711.042	1	711.044	2.33239	1.54089	NaN	5858.82	3768.24	6097.1	5401.42	4120.49	4864.87	1.17176e+06	753648	1.21942e+06	1.08028e+06	824099	972973	12412.8	7942.46	13046.6	11457	8679.26	10350.8	13905.9	12997.2	13282.8	11667.5
14456	EM-3rep-phosp-Frac9.FTMS.HCD.14456.14456.3.RT_62.047_min_3722.8_s.dta	dYSVtDIHLNAEEGRR	0.0294946	2183.01	0	BL_ORD_ID:14594	520	535	TcCLB.508209.130	hypothetical protein; conserved	hypothetical protein, conserved	Unknown function	N/A	TcChr29-S:738568-742536(+)	1322	TMT 6-plex on n-term peptide:1,phosphorylation of T:5	3	2183.02	1.94184e-06	0	729.015	728.681	1	728.681	-0.23999	-1.2505	0	16326.7	15054	16735.4	13987.9	12206.1	12664.4	3.26535e+06	3.0108e+06	3.34709e+06	2.79758e+06	2.44121e+06	2.53289e+06	34590.6	31763.9	35808.5	29669.7	25713.4	26945.6	38751.5	51979.2	36456.7	30214.9
23410	EM-3rep-phosp-Frac5.FTMS.HCD.23410.23410.2.RT_101.471_min_6088.3_s.dta	dLsPVSVVTEDAVK	0.251569	1996.05	0	BL_ORD_ID:14616	376	389	TcCLB.508209.30	hypothetical protein; conserved	hypothetical protein, conserved	Unknown function	N/A	TcChr29-S:755817-757532(+)	571	TMT 6-plex on n-term peptide:1,phosphorylation of S:3,TMT 6-plex on K:14	2	1996.05	1.91249e-05	0	999.536	999.034	1	999.034	0.290243	-0.643065	0	62193	53057.7	66013.8	57591.4	51561.2	56091.8	1.24386e+07	1.06115e+07	1.32028e+07	1.15183e+07	1.03122e+07	1.12184e+07	131765	111914	141241	122148	108630	119344	147615	183139	143798	124392
21687	EM-3rep-phosp-Frac9.FTMS.HCD.21687.21687.3.RT_90.794_min_5447.7_s.dta	kNVVSFVFADGSSAAPAAsAR	0.00299161	2589.33	0	BL_ORD_ID:8830	143	163	TcCLB.508307.125	hypothetical protein; conserved	hypothetical protein, conserved	Unknown function	N/A	TcChr37-S:647845-648360(+)	171	TMT 6-plex on K | TMT 6-plex on n-term peptide:1,phosphorylation of S:19	3	2589.33	1.47967e-07	0	864.455	864.119	1	864.121	1.50088	0.490367	18.0538	33918.3	27208.5	38739.6	32130.2	25274.3	28679.9	6.78365e+06	5.44171e+06	7.74793e+06	6.42604e+06	5.05485e+06	5.73597e+06	71860.7	57379.3	82897.3	68152.2	53233.8	61021	80505	93896.7	84397.8	69404.4
21696	EM-3rep-phosp-Frac9.FTMS.HCD.21696.21696.4.RT_90.832_min_5449.9_s.dta	kNVVSFVFADGSSAAPAAsAR	0.000156526	2589.33	0	BL_ORD_ID:8830	143	163	TcCLB.508307.125	hypothetical protein; conserved	hypothetical protein, conserved	Unknown function	N/A	TcChr37-S:647845-648360(+)	171	TMT 6-plex on K | TMT 6-plex on n-term peptide:1,phosphorylation of S:19	4	2589.33	1.05818e-08	0	648.592	648.341	1	648.342	0.623595	-0.386918	NaN	4922.87	3293.52	4467.26	3757.72	2958.92	3743.01	984574	658704	893452	751543	591784	748602	10429.8	6946.2	9559.19	7969.71	6232.36	7963.85	11684.4	11366.9	9732.23	8116.15
22136	EM-3rep-phosp-Frac9.FTMS.HCD.22136.22136.4.RT_92.608_min_5556.5_s.dta	lGILPVSRPVSPYPSPQAsQTTLSAR	0.00192213	3030.61	0	BL_ORD_ID:3730	25	50	TcCLB.508357.30	hypothetical protein; conserved	hypothetical protein, conserved	Unknown function	N/A	TcChr39-S:488102-489463(+)	453	TMT 6-plex on n-term peptide:1,phosphorylation of S:19	4	3030.61	1.17224e-07	0	758.911	758.66	1	758.66	0.234811	-0.775701	0	20020.1	13246.2	18065.8	15530.9	12096.4	10553.7	4.00401e+06	2.64923e+06	3.61316e+06	3.10619e+06	2.41928e+06	2.11075e+06	42415.4	27934.9	38657.5	32950.6	25479	22454.7	47517.6	45713.3	39357.3	33556
29415	EM-3rep-phosp-Frac6.FTMS.HCD.29415.29415.3.RT_124.649_min_7479.0_s.dta	lEQALAVNPFGqAGIsTFQPK	0.0451959	2754.44	0	BL_ORD_ID:19798	72	92	TcCLB.508973.110	hypothetical protein; conserved	hypothetical protein, conserved	Unknown function	N/A	TcChr19-S:422841-424253(+)	470	TMT 6-plex on n-term peptide:1,deamidation of N and Q:12,phosphorylation of S:16,TMT 6-plex on K:21	3	2754.44	2.26864e-06	0	919.49	919.154	1	919.155	1.56415	0.754295	37.2958	16478	10084.5	18170.6	15553.4	11908.1	12207	3.29559e+06	2.01689e+06	3.63413e+06	3.11067e+06	2.38163e+06	2.4414e+06	34911	21250.5	38882.5	32994.4	25081.6	25972.3	39110.5	34774.7	39586.3	33600.6
26479	EM-3rep-phosp-Frac7.FTMS.HCD.26479.26479.3.RT_111.535_min_6692.1_s.dta	sLAsPLLVAVPVTNNTPK	4.66958e-09	2358.34	0	BL_ORD_ID:9748	307	324	TcCLB.509149.70	hypothetical protein; conserved	hypothetical protein, conserved	Unknown function	N/A	TcChr27-S:575582-576595(+)	337	TMT 6-plex on n-term peptide:1,phosphorylation of S:4,TMT 6-plex on K:18	3	2358.33	8.0677e-13	0	787.119	787.118	0	787.119	0.890055	0.098554	NaN	15889.5	12909.8	15865.5	15059.4	10923.1	11236.7	3.1779e+06	2.58195e+06	3.17311e+06	3.01189e+06	2.18463e+06	2.24734e+06	33664.2	27225.8	33948.7	31947.9	23008.8	23907.9	37713.8	44552.9	34563.2	32534.9
10167	EM-3rep-phosp-Frac9.FTMS.HCD.10167.10167.3.RT_45.088_min_2705.3_s.dta	iPHDGsPTHSWR	0.000170033	1697.79	0	BL_ORD_ID:9748	55	66	TcCLB.509149.70	hypothetical protein; conserved	hypothetical protein, conserved	Unknown function	N/A	TcChr27-S:575582-576595(+)	337	TMT 6-plex on n-term peptide:1,phosphorylation of S:6	3	1697.79	2.51529e-08	0	566.937	566.937	0	566.937	0.9305	-0.0800126	90.652	27924	20412.3	26762.3	23252.7	16563.3	17443.3	1.97626e+06	1.44464e+06	1.89404e+06	1.64565e+06	1.17223e+06	1.23451e+06	20934.9	15234.1	20265.6	17455.8	12343.9	13133.1	23453.2	24929.4	20632.5	17776.6
11564	EM-3rep-phosp-Frac10.FTMS.HCD.11564.11564.4.RT_50.156_min_3009.4_s.dta	fSTTKPEPETASVPEEHRGsR	0.0076182	2879.42	0	BL_ORD_ID:10446	387	407	TcCLB.509157.120	hypothetical protein; conserved	hypothetical protein, conserved	Unknown function	N/A	TcChr35-S:738123-741278(+)	1051	TMT 6-plex on n-term peptide:1,TMT 6-plex on K:5,phosphorylation of S:20	4	2879.42	3.1143e-07	0	721.114	720.863	1	720.863	0.198293	-1.09411	81.5497	90179.2	61060.7	83563.8	76750.4	57984.9	79817.7	9.32258e+06	6.31235e+06	8.63868e+06	7.93433e+06	5.99439e+06	8.25143e+06	98756.2	66548.9	92423.7	84135.3	63134.4	87781.1	110636	108902	94096.7	85681.2
13122	EM-3rep-phosp-Frac10.FTMS.HCD.13122.13122.6.RT_56.427_min_3385.6_s.dta	kVsGAVPEGEEYPTEAEAERPVATDEDGHAPETASVPEEHR	0.000551048	4910.29	0	BL_ORD_ID:10446	916	956	TcCLB.509157.120	hypothetical protein; conserved	hypothetical protein, conserved	Unknown function	N/A	TcChr35-S:738123-741278(+)	1051	TMT 6-plex on K | TMT 6-plex on n-term peptide:1,phosphorylation of S:3	6	4910.3	4.29633e-08	0	819.725	819.389	2	819.391	1.48593	0.193526	35.3605	10684	8225.19	10668.3	9648.18	7133.38	8829.12	2.1368e+06	1.64504e+06	2.13366e+06	1.92964e+06	1.42668e+06	1.76582e+06	22635.6	17346.1	22828.3	20464.5	15025.2	18785.4	25358.5	28385.6	23241.5	20840.5
13408	EM-3rep-phosp-Frac10.FTMS.HCD.13408.13408.6.RT_57.580_min_3454.8_s.dta	kVSGAVPEGEEYPTEAERPVATDEDGRAPETAsVPEEHR	0.200177	4729.24	0	BL_ORD_ID:10446	960	998	TcCLB.509157.120	hypothetical protein; conserved	hypothetical protein, conserved	Unknown function	N/A	TcChr35-S:738123-741278(+)	1051	TMT 6-plex on K | TMT 6-plex on n-term peptide:1,phosphorylation of S:33	6	4729.26	1.23399e-05	0	789.719	789.216	3	789.217	0.943471	-0.348933	NaN	18662.1	12013.3	14966.9	13935.4	9786.31	11454.1	3.73242e+06	2.40265e+06	2.99337e+06	2.78707e+06	1.95726e+06	2.29083e+06	39538.4	25335.5	32026.9	29560.9	20612.4	24370.5	44294.5	41459.6	32606.6	30104
15114	EM-3rep-phosp-Frac9.FTMS.HCD.15114.15114.3.RT_64.632_min_3877.9_s.dta	sESDAKVESDVVPPsPK	1.11371e-07	2537.32	0	BL_ORD_ID:10448	749	765	TcCLB.509157.90	hypothetical protein; conserved	hypothetical protein, conserved	Unknown function	N/A	TcChr35-S:729971-732295(+)	774	TMT 6-plex on n-term peptide:1,TMT 6-plex on K:6,phosphorylation of S:15,TMT 6-plex on K:17	3	2537.32	6.42613e-12	0	847.117	846.782	1	846.782	0.648676	-0.361836	NaN	56699.6	35565.3	56432.9	47673.3	38414.9	33898.7	1.13399e+07	7.11307e+06	1.12866e+07	9.53465e+06	7.68299e+06	6.77973e+06	120126	74977.2	120755	101141	80916.8	72124.8	134577	122694	122940	102999
6498	EM-3rep-phosp-Frac11.FTMS.HCD.6498.6498.3.RT_30.235_min_1814.1_s.dta	nGNSDDINGsGDDDDDARR	0.0211468	2315.91	0	BL_ORD_ID:14482	573	591	TcCLB.509543.40	hypothetical protein; conserved	hypothetical protein, conserved	Unknown function	N/A	TcChr29-S:562536-564578(-)	680	TMT 6-plex on n-term peptide:1,phosphorylation of S:10	3	2315.91	3.93503e-06	0	773.312	772.977	1	772.977	0.14125	-0.938656	NaN	10119.4	5978.29	8757.75	8128.16	6881.88	7199.86	2.02388e+06	1.19566e+06	1.75155e+06	1.62563e+06	1.37638e+06	1.43997e+06	21439.4	12602.6	18737.7	17241	14499	15318.8	24018.4	20623.3	19076.9	17557.8
29020	EM-3rep-phosp-Frac10.FTMS.HCD.29020.29020.3.RT_120.928_min_7255.7_s.dta	lNAASPAAEASPNTTPSSFFLPVISGGGsPK	3.12671e-05	3509.79	0	BL_ORD_ID:1750	72	102	TcCLB.509805.210	hypothetical protein; conserved	hypothetical protein, conserved	Unknown function	N/A	TcChr40-S:1000573-1003593(+)	1006	TMT 6-plex on n-term peptide:1,phosphorylation of S:29,TMT 6-plex on K:31	3	3509.78	8.74751e-10	0	1171.27	1170.94	1	1170.94	2.59805	1.30565	NaN	35979.2	22084	32811.3	31868.6	23889	28444	7.19585e+06	4.4168e+06	6.56226e+06	6.37372e+06	4.77779e+06	5.6888e+06	76227.2	46546.3	70205.9	67597.4	50324.6	60519.1	85396.7	76169.4	71476.7	68839.4
24761	EM-3rep-phosp-Frac9.FTMS.HCD.24761.24761.4.RT_103.226_min_6193.6_s.dta	lNAASPAAEASPnTtPSSFFLPVISGGGSPK	4.29519e-05	3510.77	0	BL_ORD_ID:1750	72	102	TcCLB.509805.210	hypothetical protein; conserved	hypothetical protein, conserved	Unknown function	N/A	TcChr40-S:1000573-1003593(+)	1006	TMT 6-plex on n-term peptide:1,deamidation of N and Q:13,phosphorylation of T:15,TMT 6-plex on K:31	4	3510.77	1.50947e-09	0	878.953	878.7	1	878.702	3.16519	2.15468	46.4161	25345	19629.2	24217.3	21597.7	18779.4	21700.8	5.06899e+06	3.92585e+06	4.84346e+06	4.31955e+06	3.75588e+06	4.34017e+06	53696.9	41402.6	51814.8	45806.1	39564.4	46172	60156.2	67752.1	52752.8	46647.7
25456	EM-3rep-phosp-Frac10.FTMS.HCD.25456.25456.5.RT_106.375_min_6382.5_s.dta	lNAASPAAEASPnTTPsSFFLPVISGGGSPKR	0.0496755	3666.87	0	BL_ORD_ID:1750	72	103	TcCLB.509805.210	hypothetical protein; conserved	hypothetical protein, conserved	Unknown function	N/A	TcChr40-S:1000573-1003593(+)	1006	TMT 6-plex on n-term peptide:1,deamidation of N and Q:13,phosphorylation of S:17,TMT 6-plex on K:31	5	3666.87	2.52634e-06	0	734.987	734.381	3	734.385	5.54798	4.25557	0	12978	9562.69	13630.7	11821.4	8558.42	11273.9	2.5956e+06	1.91254e+06	2.72614e+06	2.36428e+06	1.71168e+06	2.25478e+06	27495.8	20164.1	29168.5	25073.1	18025	23987	30803.3	32997	29696.5	25533.8
29089	EM-3rep-phosp-Frac9.FTMS.HCD.29089.29089.2.RT_120.830_min_7249.8_s.dta	lNAASPAAEASPNTTPSSFFLPVIsGGGSPK	4.34944e-06	3509.78	0	BL_ORD_ID:1750	72	102	TcCLB.509805.210	hypothetical protein; conserved	hypothetical protein, conserved	Unknown function	N/A	TcChr40-S:1000573-1003593(+)	1006	TMT 6-plex on n-term peptide:1,phosphorylation of S:25,TMT 6-plex on K:31	2	3509.78	7.71849e-11	0	1756.4	1755.9	1	1755.9	0.115065	-0.895447	NaN	41621.4	28422.9	51336.5	38129.5	28769.8	31142.8	8.32428e+06	5.68458e+06	1.02673e+07	7.62591e+06	5.75396e+06	6.22856e+06	88180.9	59919.6	109863	80884.1	60579.8	66261.3	98788.3	98053.8	111852	82370.2
25451	EM-3rep-phosp-Frac9.FTMS.HCD.25451.25451.4.RT_106.028_min_6361.7_s.dta	lNAASPAAEASPNTTPSSFFLPVISGGGsPKR	8.75452e-06	3665.88	0	BL_ORD_ID:1750	72	103	TcCLB.509805.210	hypothetical protein; conserved	hypothetical protein, conserved	Unknown function	N/A	TcChr40-S:1000573-1003593(+)	1006	TMT 6-plex on n-term peptide:1,phosphorylation of S:29,TMT 6-plex on K:31	4	3665.89	3.33264e-10	0	917.981	917.479	2	917.48	0.809379	-0.201133	NaN	32146.7	23236	28584.2	25788.6	19655.9	22296.2	6.42933e+06	4.64721e+06	5.71684e+06	5.15771e+06	3.93119e+06	4.45924e+06	68107.3	49009.2	61163.8	54702.4	41403.7	47438.7	76300.1	80199.7	62271	55707.5
24998	EM-3rep-phosp-Frac11.FTMS.HCD.24998.24998.4.RT_105.280_min_6316.8_s.dta	eLEENSGEVAGsFLNDTREETSDVVsLGHPEMDGLR	5.71997e-07	4306.88	0	BL_ORD_ID:694	80	115	TcCLB.510055.50	hypothetical protein; conserved	hypothetical protein, conserved	Unknown function	N/A	TcChr17-S:517771-520698(+)	975	TMT 6-plex on n-term peptide:1,phosphorylation of S:12,phosphorylation of S:26	4	4306.88	6.24111e-11	0	1078.23	1077.73	2	1077.73	1.34589	0.265987	NaN	11376.6	5881.29	10200.5	15143.5	17911	19597.5	2.27532e+06	1.17626e+06	2.04011e+06	3.02871e+06	3.58221e+06	3.91951e+06	24102.9	12366.1	21802.3	32107.6	37764	41696.9	27002.3	20236.2	22196.9	32697.6
27011	EM-3rep-phosp-Frac11.FTMS.HCD.27011.27011.3.RT_113.511_min_6810.7_s.dta	tELMGQLIsNCGCsTGSASRPSSAVSAVNR	3.65341e-05	3621.58	0	BL_ORD_ID:11066	15	44	TcCLB.510149.60	hypothetical protein; conserved	hypothetical protein, conserved	Unknown function	N/A	TcChr36-S:145298-145816(-)	172	TMT 6-plex on n-term peptide:1,phosphorylation of S:9,NEM C:11,NEM C:13,phosphorylation of S:14	3	3621.59	1.9271e-09	0	1208.87	1208.2	2	1208.2	1.07991	0	63.1121	17211.3	9490.72	19244.3	28409.1	23513.9	30141.1	3.44226e+06	1.89814e+06	3.84885e+06	5.68183e+06	4.70277e+06	6.02822e+06	36464.6	19937.6	41155.2	60248.6	49563.9	64130	40851	32626.3	41900.2	61355.6
23265	EM-3rep-phosp-Frac6.FTMS.HCD.23265.23265.2.RT_99.887_min_5993.2_s.dta	sNIVFGDVNLVNsPR	0.0232445	1938.98	0	BL_ORD_ID:10854	491	505	TcCLB.510241.124	hypothetical protein; conserved	hypothetical protein, conserved	Unknown function	N/A	TcChr8-S:251125-252663(-)	512	TMT 6-plex on n-term peptide:1,phosphorylation of S:13	2	1938.97	1.54009e-06	0	970.497	970.496	0	970.497	1.03207	0.222211	0	71693.9	62247.8	90865.6	67117.2	49780.2	57995.5	1.42555e+07	1.23773e+07	1.80676e+07	1.33455e+07	9.89824e+06	1.15318e+07	151012	130539	193332	141542	104208	122678	169178	213617	196831	144143
19653	EM-3rep-phosp-Frac9.FTMS.HCD.19653.19653.3.RT_82.581_min_4954.8_s.dta	tSLmSDsPATPPVSFSR	0.122824	2103.97	0	BL_ORD_ID:10848	537	553	TcCLB.510241.90	hypothetical protein; conserved	hypothetical protein, conserved	Unknown function	N/A	TcChr8-S:243329-245323(-)	664	TMT 6-plex on n-term peptide:1,oxidation of M:4,phosphorylation of S:7	3	2103.97	8.93984e-06	0	702.667	702.332	1	702.332	-0.182533	-1.19305	0	11421.1	8280.73	10665.4	9534.79	8861.35	9331.03	2.28422e+06	1.65615e+06	2.13308e+06	1.90696e+06	1.77227e+06	1.86621e+06	24197.2	17464.1	22818.1	20222.6	18670.8	19853.3	27107.9	28578.6	23231.2	20594.2
13869	EM-3rep-phosp-Frac10.FTMS.HCD.13869.13869.4.RT_59.440_min_3566.4_s.dta	qHHQQQQQSSSTHELPtIF	0.0929783	2569.19	0	BL_ORD_ID:5432	833	851	TcCLB.510285.80	hypothetical protein; conserved	hypothetical protein, conserved	Unknown function	N/A	TcChr16-S:296835-299390(+)	851	TMT 6-plex on n-term peptide:1,phosphorylation of T:17	4	2569.2	5.0496e-06	0	643.557	643.305	1	643.306	1.53872	0.246312	NaN	27296.9	21043.5	26842	23244.8	18913.4	17683.6	5.45938e+06	4.20871e+06	5.3684e+06	4.64897e+06	3.78267e+06	3.53672e+06	57832.5	44385.3	57434.8	49312.2	39841	37624.7	64789.2	72633	58474.5	50218.2
26764	EM-3rep-phosp-Frac8.FTMS.HCD.26764.26764.2.RT_111.380_min_6682.8_s.dta	sILNTVLDTADGsDDDEVmR	0.110484	2490.11	0	BL_ORD_ID:16700	394	413	TcCLB.510565.50	hypothetical protein; conserved	hypothetical protein, conserved	Unknown function	N/A	TcChr33-S:544418-546235(+)	605	TMT 6-plex on n-term peptide:1,phosphorylation of S:13,oxidation of M:19	2	2490.1	4.10189e-06	0	1246.06	1246.06	0	1246.06	2.06931	1.32174	89.9888	10743	6439.29	9616.54	8113.77	7442.19	8314.08	2.1486e+06	1.28786e+06	1.92331e+06	1.62275e+06	1.48844e+06	1.66282e+06	22760.6	13577.3	20575.4	17207.9	15679.1	17689.5	25498.5	22218.3	20947.8	17524.1
21005	EM-3rep-phosp-Frac7.FTMS.HCD.21005.21005.4.RT_89.456_min_5367.4_s.dta	tGFVRPSAPNELLATIPSALsRR	6.56336e-05	2761.47	0	BL_ORD_ID:16700	490	512	TcCLB.510565.50	hypothetical protein; conserved	hypothetical protein, conserved	Unknown function	N/A	TcChr33-S:544418-546235(+)	605	TMT 6-plex on n-term peptide:1,phosphorylation of S:21	4	2761.48	6.09978e-09	0	691.88	691.378	2	691.379	0.582724	-0.208777	0	32929	26031.7	32897.7	29426.2	23227.9	23240.3	4.03327e+06	3.18846e+06	4.02943e+06	3.60423e+06	2.84504e+06	2.84656e+06	42725.3	33623.8	43109.6	38229.3	29965.5	30282.6	47864.8	55022.8	43889.9	38931.7
24783	EM-3rep-phosp-Frac7.FTMS.HCD.24783.24783.3.RT_104.659_min_6279.5_s.dta	tLVNPNTQPSQVECLLsSK	0.234465	2720.38	0	BL_ORD_ID:4696	46	64	TcCLB.510763.60	hypothetical protein; conserved	hypothetical protein, conserved	Unknown function	N/A	TcChr39-S:1767426-1768151(+)	241	TMT 6-plex on n-term peptide:1,NEM C:14,phosphorylation of S:17,TMT 6-plex on K:19	3	2720.39	9.20012e-06	0	908.137	907.803	1	907.803	0.0947614	-0.69674	0	28914	19041.9	28449.5	21484.6	21874.8	21674.8	5.7828e+06	3.80837e+06	5.68989e+06	4.29692e+06	4.37497e+06	4.33496e+06	61258.4	40161.3	60870.3	45565.9	46085.2	46116.6	68627.3	65720.8	61972.1	46403.1
19703	EM-3rep-phosp-Frac8.FTMS.HCD.19703.19703.3.RT_82.907_min_4974.4_s.dta	lLHFGVDDNKLSEtDGSPTK	0.0232191	2939.52	0	BL_ORD_ID:19652	469	488	TcCLB.510859.24	hypothetical protein; conserved	hypothetical protein, conserved	Unknown function	N/A	TcChr19-S:174786-176777(-)	663	TMT 6-plex on n-term peptide:1,TMT 6-plex on K:10,phosphorylation of T:14,TMT 6-plex on K:20	3	2939.53	9.15361e-07	0	981.184	980.849	1	980.849	0.388622	-0.358953	0	25537.5	17816	30242.1	24983.9	21273.2	17738.4	5.10751e+06	3.5632e+06	6.04841e+06	4.99679e+06	4.25463e+06	3.54768e+06	54105	37553.9	64710.2	53004.4	44811.8	37741.2	60613.3	61454.1	65881.5	53978.3
21289	EM-3rep-phosp-Frac9.FTMS.HCD.21289.21289.4.RT_89.183_min_5351.0_s.dta	lIVNFVDGRPNELLGTsNHGSSSTR	0.000285835	2978.47	0	BL_ORD_ID:14972	280	304	TcCLB.511001.130	hypothetical protein; conserved	hypothetical protein, conserved	Unknown function	N/A	TcChr38-S:160862-167188(+)	2108	TMT 6-plex on n-term peptide:1,phosphorylation of S:17	4	2978.48	1.21178e-08	0	746.13	745.628	2	745.629	1.51411	0.503594	0	19930.8	14663.5	19759.1	13633.1	16852.4	13299.5	3.98616e+06	2.9327e+06	3.95182e+06	2.72661e+06	3.37047e+06	2.6599e+06	42226.3	30939.9	42272.7	28914.9	35508.9	28296.9	47305.7	50630.8	43037.9	29446.2
19619	EM-3rep-phosp-Frac9.FTMS.HCD.19619.19619.4.RT_82.443_min_4946.6_s.dta	nKSCTESLFEtAPLGHQQSFSLLSQR	0.000683799	3570.75	0	BL_ORD_ID:8692	217	242	TcCLB.511037.40	hypothetical protein; conserved	hypothetical protein, conserved	Unknown function	N/A	TcChr37-S:466675-468429(+)	584	TMT 6-plex on n-term peptide:1,TMT 6-plex on K:2,NEM C:4,phosphorylation of T:11	4	3570.76	2.32585e-08	0	894.198	893.697	2	893.697	-0.275067	-1.28558	NaN	15297.6	9539.32	14333.6	13625.3	9488.55	12404.8	3.05952e+06	1.90786e+06	2.86672e+06	2.72506e+06	1.89771e+06	2.48097e+06	32410.2	20106.6	30671.5	28900.5	19985.7	26393.3	36308.9	32902.9	31226.7	29431.5
18602	EM-3rep-phosp-Frac10.FTMS.HCD.18602.18602.4.RT_78.577_min_4714.6_s.dta	nINANIAAVPmNIADKsSPR	0.000284227	2649.38	0	BL_ORD_ID:8692	30	49	TcCLB.511037.40	hypothetical protein; conserved	hypothetical protein, conserved	Unknown function	N/A	TcChr37-S:466675-468429(+)	584	TMT 6-plex on n-term peptide:1,oxidation of M:11,TMT 6-plex on K:16,phosphorylation of S:17	4	2649.37	1.90961e-08	0	663.352	663.35	0	663.352	2.30262	1.01022	NaN	15484.7	11035.5	14639.8	13357.1	9858.52	8479.66	3.09693e+06	2.20711e+06	2.92797e+06	2.67143e+06	1.9717e+06	1.69593e+06	32806.5	23271	31326.4	28340	20765.5	18041.8	36752.9	38081.2	31893.5	28860.7
23152	EM-3rep-phosp-Frac6.FTMS.HCD.23152.23152.4.RT_99.433_min_5966.0_s.dta	kIsVTLPLPQIVSGHVSELR	0.000847813	2710.55	0	BL_ORD_ID:124	79	98	TcCLB.511111.40	hypothetical protein; conserved	hypothetical protein, conserved	Unknown function	N/A	TcChr23-S:263603-265336(-)	577	TMT 6-plex on K | TMT 6-plex on n-term peptide:1,phosphorylation of S:3	4	2710.55	2.4475e-07	0	678.897	678.646	1	678.646	0.162758	-0.647102	NaN	13438.1	5924.31	10459.6	24836.3	15477.7	27711.3	2.68762e+06	1.18486e+06	2.09193e+06	4.96726e+06	3.09553e+06	5.54225e+06	28470.5	12413.6	22362.6	52668.5	32629.7	58960.1	31895.3	20313.9	22767.4	53636.2
29435	EM-3rep-phosp-Frac8.FTMS.HCD.29435.29435.3.RT_122.250_min_7335.0_s.dta	lFALLERPIEGTDESDVYYyPGTPADEMQR	1.97205e-07	3783.75	0	BL_ORD_ID:1252	104	133	TcCLB.511363.4	hypothetical protein; conserved	hypothetical protein, conserved	Unknown function	N/A	TcChr40-S:176639-177388(-)	250	TMT 6-plex on n-term peptide:1,phosphorylation of Y:20	3	3783.76	5.77181e-12	0	1262.93	1262.26	2	1262.26	2.35227	1.60469	96.4053	8332.85	3914.51	7191.32	11191.3	8719.17	10743.1	1.66657e+06	782903	1.43826e+06	2.23826e+06	1.74383e+06	2.14861e+06	17654.4	8225.74	15379.3	23736.5	18378.7	22857.6	19778	13460.8	15657.7	24172.6
28845	EM-3rep-phosp-Frac8.FTMS.HCD.28845.28845.4.RT_119.839_min_7190.3_s.dta	lFALLERPIEGTDESDVYYYPGtPADEmQR	2.5489e-06	3799.74	0	BL_ORD_ID:1252	104	133	TcCLB.511363.4	hypothetical protein; conserved	hypothetical protein, conserved	Unknown function	N/A	TcChr40-S:176639-177388(-)	250	TMT 6-plex on n-term peptide:1,phosphorylation of T:23,oxidation of M:28	4	3799.75	1.10466e-10	0	951.447	950.946	2	950.945	-0.41893	-1.1665	NaN	3830.18	2717.45	4170.73	5692.48	4677.68	5397.36	766035	543489	834146	1.1385e+06	935536	1.07947e+06	8114.78	5719.6	8920.34	12073.8	9859.11	11483.7	9090.92	9359.68	9081.81	12295.6
17288	EM-3rep-phosp-Frac8.FTMS.HCD.17288.17288.3.RT_73.484_min_4409.0_s.dta	sETLNLALLRHsDTGNLR	0.0233242	2318.19	0	BL_ORD_ID:1252	19	36	TcCLB.511363.4	hypothetical protein; conserved	hypothetical protein, conserved	Unknown function	N/A	TcChr40-S:176639-177388(-)	250	TMT 6-plex on n-term peptide:1,phosphorylation of S:12	3	2318.2	1.61368e-06	0	774.074	773.739	1	773.74	0.974455	0.22688	NaN	40585.2	27888.5	40663.5	39333.3	30106.8	31516.6	6.39555e+06	4.39476e+06	6.4079e+06	6.19827e+06	4.74433e+06	4.9665e+06	67749.5	46317.2	68553.6	65743	49973.3	52835.1	75899.2	75794.5	69794.5	66950.9
29770	EM-3rep-phosp-Frac9.FTMS.HCD.29770.29770.4.RT_123.592_min_7415.5_s.dta	dATQVLLNLIEAPNRFPStPqTSEGSK	0.000748966	3451.76	0	BL_ORD_ID:10072	397	423	TcCLB.511535.30	hypothetical protein; conserved	hypothetical protein, conserved	Unknown function	N/A	TcChr35-S:273446-276094(-)	882	TMT 6-plex on n-term peptide:1,phosphorylation of T:19,deamidation of N and Q:21,TMT 6-plex on K:27	4	3451.77	2.78498e-08	0	864.451	863.948	2	863.95	1.57264	0.562126	30.1286	9496.73	7870.66	9223.29	8424.37	5004.35	7435.46	1.89935e+06	1.57413e+06	1.84466e+06	1.68487e+06	1.00087e+06	1.48709e+06	20120.2	16602.1	19738.8	17869.3	10536.9	15820.1	22540.5	27168	20096.1	18197.7
23071	EM-3rep-phosp-Frac8.FTMS.HCD.23071.23071.3.RT_96.446_min_5786.8_s.dta	aLYGRSPLsSVCGSVNSWSASSR	0.302297	2804.31	0	BL_ORD_ID:18202	128	150	TcCLB.511557.40	hypothetical protein; conserved	hypothetical protein, conserved	Unknown function	N/A	TcChr41-S:508125-510422(-)	765	TMT 6-plex on n-term peptide:1,phosphorylation of S:9,NEM C:12	3	2804.31	9.6921e-06	0	936.115	935.779	1	935.78	1.17199	0.424413	0	67212.6	47490.9	66127.9	64318.1	45143.8	46148.2	1.16442e+07	8.2275e+06	1.14563e+07	1.11427e+07	7.82088e+06	7.99489e+06	123349	86721.6	122570	118197	82369.4	85052	138187	141913	124788	120369
23395	EM-3rep-phosp-Frac8.FTMS.HCD.23395.23395.3.RT_97.749_min_5864.9_s.dta	aLYGRsPLSSVCGSVNSWSASSR	0.00524929	2804.31	0	BL_ORD_ID:18202	128	150	TcCLB.511557.40	hypothetical protein; conserved	hypothetical protein, conserved	Unknown function	N/A	TcChr41-S:508125-510422(-)	765	TMT 6-plex on n-term peptide:1,phosphorylation of S:6,NEM C:12	3	2804.31	1.683e-07	0	936.115	935.779	1	935.78	1.36787	0.620296	100	22857.3	17166	21666.9	20739.2	15842.6	15994.5	4.57146e+06	3.43319e+06	4.33339e+06	4.14784e+06	3.16853e+06	3.1989e+06	48426.5	36198.7	46360.3	43996.1	33374.4	34030.9	54251.8	59236.3	47199.5	44804.5
30445	EM-3rep-phosp-Frac8.FTMS.HCD.30445.30445.3.RT_126.376_min_7582.6_s.dta	dqGSVVsVQDSqIDILSALR	0.000457076	2440.18	0	BL_ORD_ID:16448	222	241	TcCLB.511585.50	hypothetical protein; conserved	hypothetical protein, conserved	Unknown function	N/A	TcChr33-S:105064-106395(-)	443	TMT 6-plex on n-term peptide:1,deamidation of N and Q:2,phosphorylation of S:7,deamidation of N and Q:12	3	2440.19	1.99257e-08	0	814.737	814.405	1	814.402	-3.61541	-4.36298	NaN	2152.97	1563.52	2676.67	3182.58	2510.92	3236.01	430594	312705	535334	636515	502184	647202	4561.38	3291.28	5725.96	6749.75	5291.26	6885.13	5110.07	5385.92	5829.61	6873.77
30519	EM-3rep-phosp-Frac8.FTMS.HCD.30519.30519.3.RT_126.679_min_7600.7_s.dta	eCHGAPSIGmQSPQAsLISPLLPFLSTTGDEDR	0.0378737	3903.8	0	BL_ORD_ID:288	229	261	TcCLB.511621.130	hypothetical protein; conserved	hypothetical protein, conserved	Unknown function	N/A	TcChr23-S:439661-442417(-)	918	TMT 6-plex on n-term peptide:1,NEM C:2,oxidation of M:10,phosphorylation of S:16	3	3903.83	1.0919e-06	0	1303.28	1302.28	3	1302.28	-2.5774	-3.32498	NaN	1329.53	822.51	2233.99	2595.79	2405.86	2890.34	265906	164502	446799	519158	481172	578068	2816.8	1727.28	4778.29	5504.7	5070.61	6149.66	3155.64	2826.57	4864.78	5605.84
30049	EM-3rep-phosp-Frac6.FTMS.HCD.30049.30049.3.RT_127.236_min_7634.2_s.dta	tAITVAGVSAsSLMSPLLAANTPVR	8.221e-06	2735.45	0	BL_ORD_ID:20132	1100	1124	TcCLB.511685.60	hypothetical protein; conserved	hypothetical protein, conserved	Unknown function	N/A	TcChr24-S:356117-360655(+)	1512	TMT 6-plex on n-term peptide:1,phosphorylation of S:11	3	2735.45	4.78661e-10	0	913.159	912.824	1	912.825	1.15629	0.346426	NaN	5059.29	2957.96	5791.23	7330.88	5783.09	7817.12	1.01186e+06	591591	1.15825e+06	1.46618e+06	1.15662e+06	1.56342e+06	10718.8	6220.74	12387.9	15546.8	12187.5	16632.2	12008.2	10179.8	12612.1	15832.5
15016	EM-3rep-phosp-Frac11.FTMS.HCD.15016.15016.4.RT_64.655_min_3879.3_s.dta	hTPELHDLsKEGsDVPLTGTSGNGGSAPAR	0.0117642	3604.7	0	BL_ORD_ID:17652	27	56	TcCLB.511871.90	hypothetical protein; conserved	hypothetical protein, conserved	Unknown function	N/A	TcChr15-S:90161-91909(+)	582	TMT 6-plex on n-term peptide:1,phosphorylation of S:9,TMT 6-plex on K:10,phosphorylation of S:13	4	3604.7	3.74609e-07	0	902.434	902.181	1	902.183	1.54736	0.46745	0	16713.5	10781.6	15346.4	15224.7	10525	12456.4	3.34271e+06	2.15631e+06	3.06929e+06	3.04494e+06	2.105e+06	2.49127e+06	35410.1	22725.7	32838	32296.1	22170	26502.9	39669.6	37188.8	33432.5	32889.5
15060	EM-3rep-phosp-Frac3.FTMS.HCD.15060.15060.3.RT_70.235_min_4214.1_s.dta	fITTLsPHAAR	0.170319	1521.79	0	BL_ORD_ID:17652	415	425	TcCLB.511871.90	hypothetical protein; conserved	hypothetical protein, conserved	Unknown function	N/A	TcChr15-S:90161-91909(+)	582	TMT 6-plex on n-term peptide:1,phosphorylation of S:6	3	1521.79	3.71794e-05	0	508.271	508.271	0	508.271	0.256072	-0.388909	58.8226	2491.03	1505.88	2436.94	2236.78	1520.36	1582.93	498206	301176	487389	447356	304071	316585	5277.61	3173.64	5214.87	4745.43	3202	3367.93	5912.46	5193.42	5309.26	4832.62
18544	EM-3rep-phosp-Frac11.FTMS.HCD.18544.18544.4.RT_79.037_min_4742.2_s.dta	gGTGGSTPDAEGLASTQNSQLPVAHVDVGSsDDEDNDNNK	0.141888	4493.01	0	BL_ORD_ID:4988	456	495	TcCLB.506733.140	hypothetical protein; conserved	hypothetical protein, conserved	metal ion binding	nucleolus	TcChr14-S:289724-292072(-)	782	TMT 6-plex on n-term peptide:1,phosphorylation of S:31,TMT 6-plex on K:40	4	4493.01	1.16321e-05	0	1124.51	1124.26	1	1124.26	1.16698	0.0870712	NaN	27850.7	13455.4	25684.1	40911.7	55904.6	39736	5.57014e+06	2.69109e+06	5.13681e+06	8.18233e+06	1.11809e+07	7.94719e+06	59005.7	28263.5	54871.8	86771.5	117884	84544.6	66103.6	46251.1	55865	88365.8
15190	EM-3rep-phosp-Frac11.FTMS.HCD.15190.15190.5.RT_65.363_min_3921.8_s.dta	rGGTGGSTPDAEGLASTQNSQLPVAHVDVGsSDDEDNDNNKK	2.16353e-11	5006.38	0	BL_ORD_ID:4988	455	496	TcCLB.506733.140	hypothetical protein; conserved	hypothetical protein, conserved	metal ion binding	nucleolus	TcChr14-S:289724-292072(-)	782	TMT 6-plex on n-term peptide:1,phosphorylation of S:31,TMT 6-plex on K:41,TMT 6-plex on K:42	5	5006.37	1.1809e-15	0	1002.49	1002.28	1	1002.28	2.50819	1.42828	100	13506.5	8238.36	14862.7	12601.7	9975.16	9198.13	2.70129e+06	1.64767e+06	2.97253e+06	2.52035e+06	1.99503e+06	1.83963e+06	28615.4	17360.7	31803.3	26734.5	21011.1	19570.5	32057.6	28409.5	32379	27225.7
28917	EM-3rep-phosp-Frac11.FTMS.HCD.28917.28917.4.RT_121.317_min_7279.0_s.dta	rSDNDGDKPSGVsPVEPEsPLEEGSDLTNFTTLYVCPGCGAR	0.00863364	5263.35	0	BL_ORD_ID:112	233	274	TcCLB.480653.10	hypothetical protein; conserved	hypothetical protein, conserved	nucleic acid binding	nucleus	TcChr23-S:239516-240436(-)	306	TMT 6-plex on n-term peptide:1,TMT 6-plex on K:8,phosphorylation of S:13,phosphorylation of S:19,NEM C:36,NEM C:39	4	5263.34	9.3085e-07	0	1317.6	1316.84	3	1316.85	2.78517	1.70526	71.5752	4001.33	2512.8	4263.23	5598.27	6260.49	7419.05	800267	502560	852647	1.11965e+06	1.2521e+06	1.48381e+06	8477.4	5287.38	9114.85	11869.2	13198.2	15785.2	9497.16	8652.38	9279.84	12087.2
24836	EM-3rep-phosp-Frac8.FTMS.HCD.24836.24836.4.RT_103.563_min_6213.8_s.dta	tKPGLEIVLPGDVGVTGVYDPAsIVRSPTR	0.000256536	3630.97	0	BL_ORD_ID:13692	136	165	TcCLB.509445.20	hypothetical protein; conserved	pre-mRNA splicing factor, putative	mRNA splicing	spliceosomal complex	TcChr7-S:256253-257659(+)	468	TMT 6-plex on n-term peptide:1,TMT 6-plex on K:2,phosphorylation of S:23	4	3630.98	2.27265e-08	0	909.003	908.752	1	908.752	0.219308	-0.528267	NaN	13013.6	11348.6	12797.1	9005.63	10156.2	8541.32	2.60273e+06	2.26973e+06	2.55941e+06	1.80113e+06	2.03124e+06	1.70826e+06	27571.3	23952.5	27379.8	19100.9	21397.7	18173	30887.8	39196.4	27875.4	19451.9
24928	EM-3rep-phosp-Frac7.FTMS.HCD.24928.24928.3.RT_105.249_min_6314.9_s.dta	vLsSEERGQLVEALSNVAK	0.469177	2566.37	0	BL_ORD_ID:12270	434	452	TcCLB.503595.10	hypothetical protein; conserved	hypothetical protein, conserved	cell tip	cell tip	TcChr12-S:123806-125860(+)	684	TMT 6-plex on n-term peptide:1,phosphorylation of S:3,TMT 6-plex on K:19	3	2566.38	3.33934e-05	0	856.801	856.466	1	856.467	0.719133	-0.072368	0	26511.3	20112.5	28013.7	21834	17650.6	19413.1	5.30227e+06	4.02249e+06	5.60274e+06	4.3668e+06	3.53012e+06	3.88262e+06	56168.1	42423.1	59946.7	46312.8	37174.4	41304.5	62924.6	69422.2	61031.8	47163.7
10497	EM-3rep-phosp-Frac10.FTMS.HCD.10497.10497.5.RT_45.858_min_2751.5_s.dta	eAHENVHEsFVASPPHGEASQLPQQTVR	0.108619	3389.6	0	BL_ORD_ID:1486	205	232	TcCLB.453917.9	hypothetical protein; conserved	hypothetical protein, conserved	intraciliary transport particle	N/A	TcChr40-S:519769-520851(+)	361	TMT 6-plex on n-term peptide:1,phosphorylation of S:9	5	3389.6	4.57885e-06	0	679.129	678.927	1	678.928	1.35474	0.0623372	0	6650.63	5225.86	6339.69	6028.1	4394.7	4862.83	1.33013e+06	1.04517e+06	1.26794e+06	1.20562e+06	878940	972565	14090.3	11021.3	13565.4	12787.5	9257.21	10346.4	15785.3	18035.5	13811	13022.5
29222	EM-3rep-phosp-Frac8.FTMS.HCD.29222.29222.4.RT_121.377_min_7282.6_s.dta	lAMNLLVTGDVPEFyVPDADRSmDAPR	1.91923e-05	3316.56	0	BL_ORD_ID:1498	122	148	TcCLB.506527.4	hypothetical protein; conserved (fragment)	Flagellum attachment zone protein 9 (fragment)	structural	cilium, cytoskeleton	TcChr40-S:587560-588990(+)	477	TMT 6-plex on n-term peptide:1,phosphorylation of Y:15,oxidation of M:23	4	3316.57	7.05264e-10	0	830.652	830.15	2	830.15	0.19408	-0.553494	NaN	2785.44	1726.45	2469.72	1510.54	1786.18	1941.52	557089	345290	493943	302108	357237	388304	5901.36	3643.22	5284.44	3202.7	3762.74	4130.9	6611.25	5961.85	5380.1	3261.55
27473	EM-3rep-phosp-Frac10.FTMS.HCD.27473.27473.4.RT_114.607_min_6876.4_s.dta	nAVPCSLPSIKPLPQSGVLSPPIAVITPVHAGSPSNsTSNFMGDDVR	1.45851e-06	5416.76	0	BL_ORD_ID:5858	3013	3059	TcCLB.507083.109	hypothetical protein; conserved (fragment)	N-terminal region of Chorein, a TM vesicle-mediated sorter/Integral peroxisomal membrane peroxin, putative	N/A	cytoplasm	TcChr25-S:344674-359217(+)	4848	TMT 6-plex on n-term peptide:1,NEM C:5,TMT 6-plex on K:11,phosphorylation of S:37	4	5416.76	7.77873e-11	0	1355.45	1355.2	1	1355.2	1.32871	0.0363043	NaN	12734.2	7278.21	11209.9	16146.5	16432.1	17316	2.54684e+06	1.45564e+06	2.24197e+06	3.2293e+06	3.28642e+06	3.4632e+06	26979.2	15314.9	23966.9	34242.2	34641.6	36842.5	30224.6	25061.7	24400.8	34871.4
19601	EM-3rep-phosp-Frac9.FTMS.HCD.19601.19601.4.RT_82.373_min_4942.4_s.dta	aPPSRtPLRPALQQDVPFLDTHLVR	0.0692173	3132.68	0	BL_ORD_ID:5858	1305	1329	TcCLB.507083.109	hypothetical protein; conserved (fragment)	N-terminal region of Chorein, a TM vesicle-mediated sorter/Integral peroxisomal membrane peroxin, putative	N/A	cytoplasm	TcChr25-S:344674-359217(+)	4848	TMT 6-plex on n-term peptide:1,phosphorylation of T:6	4	3132.68	4.54241e-06	0	784.178	784.177	0	784.178	0.804609	-0.205904	0	16411.4	12152.1	16063.8	13065.4	11962.8	13396.7	3.28229e+06	2.43041e+06	3.21277e+06	2.61309e+06	2.39256e+06	2.67933e+06	34770	25632.9	34371	27709.5	25201.7	28503.6	38952.5	41946.2	34993.1	28218.7
11885	EM-3rep-phosp-Frac9.FTMS.HCD.11885.11885.3.RT_51.878_min_3112.7_s.dta	tEASSEAPVsPK	2.06477e-06	1739.88	0	BL_ORD_ID:5858	2140	2151	TcCLB.507083.109	hypothetical protein; conserved (fragment)	N-terminal region of Chorein, a TM vesicle-mediated sorter/Integral peroxisomal membrane peroxin, putative	N/A	cytoplasm	TcChr25-S:344674-359217(+)	4848	TMT 6-plex on n-term peptide:1,phosphorylation of S:10,TMT 6-plex on K:12	3	1739.88	2.81266e-10	0	580.966	580.966	0	580.966	0.559182	-0.45133	NaN	56647.2	54187.4	66355	40343.3	51421.1	33589.9	5.17231e+06	4.9477e+06	6.0587e+06	3.68364e+06	4.69512e+06	3.067e+06	54791.4	52218.7	64815.4	39069.8	49458.2	32627.7	61382.3	85451.9	65988.6	39787.7
25006	EM-3rep-phosp-Frac11.FTMS.HCD.25006.25006.4.RT_105.313_min_6318.8_s.dta	yANAAAAAGLGETADVVSNEVDEADEGNsDDNNDNAEEVEDEMPATNGGGR	2.27003e-05	5448.26	0	BL_ORD_ID:11416	788	838	TcCLB.510317.7	hypothetical protein; conserved (fragment)	Present in the outer mitochondrial membrane proteome 24	protein binding	mitochondrial outer membrane	TcChr36-S:679268-683104(+)	1279	TMT 6-plex on n-term peptide:1,phosphorylation of S:29	4	5448.24	1.46359e-08	0	1364.08	1363.07	4	1363.08	6.21632	5.13642	NaN	4987.24	2878.49	5582.54	10427	13511.1	10441.1	997447	575697	1.11651e+06	2.0854e+06	2.70223e+06	2.08823e+06	10566.2	6038.84	11923.5	22114.4	28491.9	22215.2	11837.2	9882.09	12139.4	22520.7
27563	EM-3rep-phosp-Frac7.FTMS.HCD.27563.27563.3.RT_115.939_min_6956.3_s.dta	lNAITSMLTSNEYETAsPTIQR	2.09116e-05	2748.32	0	BL_ORD_ID:11416	144	165	TcCLB.510317.7	hypothetical protein; conserved (fragment)	Present in the outer mitochondrial membrane proteome 24	protein binding	mitochondrial outer membrane	TcChr36-S:679268-683104(+)	1279	TMT 6-plex on n-term peptide:1,phosphorylation of S:17	3	2748.33	7.16322e-10	0	917.45	917.115	1	917.116	0.491492	-0.300009	NaN	7723.5	4684.11	9057.94	10552.9	9200.8	10040.8	1.5447e+06	936822	1.81159e+06	2.11058e+06	1.84016e+06	2.00815e+06	16363.3	9855.66	19375.3	22382.7	19390.5	21363.3	18331.7	16128	19726	22793.9
23582	EM-3rep-phosp-Frac9.FTMS.HCD.23582.23582.4.RT_98.450_min_5907.0_s.dta	lNAITSmLTsNEYETASPTIQR	0.0460236	2764.32	0	BL_ORD_ID:11416	144	165	TcCLB.510317.7	hypothetical protein; conserved (fragment)	Present in the outer mitochondrial membrane proteome 24	protein binding	mitochondrial outer membrane	TcChr36-S:679268-683104(+)	1279	TMT 6-plex on n-term peptide:1,oxidation of M:7,phosphorylation of S:10	4	2764.32	2.11069e-06	0	692.087	692.087	0	692.087	0.247112	-0.7634	0	8841.41	6472.08	8652.42	7117.68	5993.91	7910.77	1.76828e+06	1.29442e+06	1.73048e+06	1.42354e+06	1.19878e+06	1.58215e+06	18731.8	13651.1	18514.1	15094	12625.8	16831.4	20985.1	22339	18849.3	15371.3
21528	EM-3rep-phosp-Frac8.FTMS.HCD.21528.21528.4.RT_90.234_min_5414.0_s.dta	dMTHPSHGFFFLADTPtVTSQR	0.167737	2800.27	0	BL_ORD_ID:6794	109	130	TcCLB.507667.11	hypothetical protein; conserved (fragment)	GPI ethanolamine phosphate transferase 3, putative (fragment)	metabolic process	N/A	TcChr26-S:667748-668671(-)	308	TMT 6-plex on n-term peptide:1,phosphorylation of T:17	4	2800.29	7.52386e-06	0	701.58	701.079	2	701.079	-1.01164	-1.75922	NaN	6575.92	5108.87	7237.06	4492.77	4179.2	4168.72	1.31518e+06	1.02177e+06	1.44741e+06	898554	835840	833745	13932	10780.8	15487.5	9529.38	8800.54	8869.62	15607.9	17642	15767.8	9704.47
23296	EM-3rep-phosp-Frac7.FTMS.HCD.23296.23296.3.RT_98.647_min_5918.8_s.dta	yRLPFDADVVsADNTESALPK	2.3397e-07	2845.43	0	BL_ORD_ID:5060	134	154	TcCLB.508731.9	hypothetical protein; conserved (fragment)	Uncharacterised ACR, YagE family COG1723, putative	N/A	N/A	TcChr14-S:395073-396329(-)	419	TMT 6-plex on n-term peptide:1,phosphorylation of S:11,TMT 6-plex on K:21	3	2845.43	8.13468e-12	0	949.819	949.484	1	949.485	0.499809	-0.291693	NaN	15326	12600.7	17905.5	14421.6	11797.9	15735.8	3.06519e+06	2.52015e+06	3.5811e+06	2.88432e+06	2.35958e+06	3.14716e+06	32470.3	26575.4	38314.9	30583.6	24849.7	33480.5	36376.2	43488.6	39008.5	31145.5
23330	EM-3rep-phosp-Frac7.FTMS.HCD.23330.23330.4.RT_98.782_min_5926.9_s.dta	yRLPFDADVVsADNTESALPK	0.480453	2845.43	0	BL_ORD_ID:5060	134	154	TcCLB.508731.9	hypothetical protein; conserved (fragment)	Uncharacterised ACR, YagE family COG1723, putative	N/A	N/A	TcChr14-S:395073-396329(-)	419	TMT 6-plex on n-term peptide:1,phosphorylation of S:11,TMT 6-plex on K:21	4	2845.43	2.12233e-05	0	712.616	712.365	1	712.366	0.924145	0.132644	49.2579	11052.1	7047.46	11807.4	9522.24	8173.55	8624.91	2.21042e+06	1.40949e+06	2.36149e+06	1.90445e+06	1.63471e+06	1.72498e+06	23415.5	14856.8	25265.1	20197.6	17217.1	18350.9	26232.1	24312	25722.5	20568.7
11255	EM-3rep-phosp-Frac9.FTMS.HCD.11255.11255.3.RT_49.386_min_2963.2_s.dta	sAGPNASLLmHsTTR	0.027457	1866.89	0	BL_ORD_ID:10628	92	106	TcCLB.504643.49	hypothetical protein; conserved (fragment)	hypothetical protein, conserved (fragment)	protein phosphorylation/dephosphorylation	N/A	TcChr35-S:1079353-1080861(-)	503	TMT 6-plex on n-term peptide:1,oxidation of M:10,phosphorylation of S:12	3	1866.89	2.73503e-06	0	623.303	623.303	0	623.303	0.287523	-0.722989	0	9547.75	7697.37	9070.13	8595.52	6713.34	6587.5	1.90955e+06	1.53947e+06	1.81403e+06	1.7191e+06	1.34267e+06	1.3175e+06	20228.3	16235	19407	18234.6	14142.7	14016	22661.6	26567.3	19758.3	18569.7
16935	EM-3rep-phosp-Frac9.FTMS.HCD.16935.16935.4.RT_71.751_min_4305.1_s.dta	fLHTSPAGSTKPPKsPDGINSSGILK	0.00365103	3632.02	0	BL_ORD_ID:17088	21	46	TcCLB.505229.5	hypothetical protein; conserved (fragment)	hypothetical protein, conserved (fragment)	Unknown function	N/A	TcChr3-S:92491-92979(+)	163	TMT 6-plex on n-term peptide:1,TMT 6-plex on K:11,TMT 6-plex on K:14,phosphorylation of S:15,TMT 6-plex on K:26	4	3632.01	5.14809e-07	0	909.265	909.011	1	909.014	2.99138	1.98087	46.9079	21684.8	14648.5	23637.9	32314.8	23626.2	32776	4.33696e+06	2.92969e+06	4.72758e+06	6.46295e+06	4.72523e+06	6.55519e+06	45942.4	30824.4	50563.2	68534.8	49790.9	69736.1	51468.9	50441.7	51478.5	69794
25864	EM-3rep-phosp-Frac9.FTMS.HCD.25864.25864.4.RT_107.707_min_6462.4_s.dta	lTLWLRPsPIEDDEDEAVSSGVGSAGR	0.000796583	3164.52	0	BL_ORD_ID:6	187	213	TcCLB.511189.10	hypothetical protein; conserved (pseudogene)	hypothetical protein, conserved (pseudogene)	Unknown function	axoneme, cytoplasm	TcChr23-S:21674-22750(-)	359	TMT 6-plex on n-term peptide:1,phosphorylation of S:8	4	3164.52	2.94257e-08	0	792.388	792.138	1	792.138	-0.550804	-1.56132	NaN	10279.9	6769.08	8547.34	8163.09	6761.66	8146.16	2.05597e+06	1.35382e+06	1.70947e+06	1.63262e+06	1.35233e+06	1.62923e+06	21779.4	14274.3	18287.4	17313	14245.8	17332.3	24399.2	23358.9	18618.4	17631.1
29856	EM-3rep-phosp-Frac8.FTMS.HCD.29856.29856.3.RT_123.967_min_7438.0_s.dta	sEFIESPIFITGNtTAPVSVSSQLTVK	0.100675	3389.78	0	BL_ORD_ID:7298	1706	1732	TcCLB.507735.50	hypothetical protein; conserved (pseudogene)	Nucleoporin NUP225	Unknown function	nuclear pore, nuclear pore inner ring	TcChr34-S:805689-811841(+)	2050	TMT 6-plex on n-term peptide:1,phosphorylation of T:14,TMT 6-plex on K:27	3	3389.78	3.84008e-06	0	1131.27	1130.93	1	1130.94	1.90028	1.15271	NaN	4169.84	2616.17	4496.68	3576.45	2509.7	3124.52	833967	523233	899336	715291	501940	624904	8834.4	5514.97	9623.21	7586.26	5284.58	6647.92	9897.1	9024.82	9797.4	7725.65
13268	EM-3rep-phosp-Frac9.FTMS.HCD.13268.13268.4.RT_57.384_min_3443.0_s.dta	tNIYHQHLLDAPmRQsLK	0.28388	2718.41	0	BL_ORD_ID:7298	1926	1943	TcCLB.507735.50	hypothetical protein; conserved (pseudogene)	Nucleoporin NUP225	Unknown function	nuclear pore, nuclear pore inner ring	TcChr34-S:805689-811841(+)	2050	TMT 6-plex on n-term peptide:1,oxidation of M:13,phosphorylation of S:16,TMT 6-plex on K:18	4	2718.41	1.78395e-05	0	680.861	680.609	1	680.61	1.60236	0.591852	88.1129	38716.2	23314	34400.5	25265.9	26594.4	21826.6	4.83697e+06	2.91272e+06	4.2978e+06	3.15657e+06	3.32255e+06	2.72688e+06	51239.1	30719.1	45977.5	33478.4	34999.5	29009.4	57402.8	50269.3	46809.7	34093.6
28375	EM-3rep-phosp-Frac7.FTMS.HCD.28375.28375.4.RT_119.259_min_7155.6_s.dta	aFVPLIPVAQNANPTPESPFLLsPEKDR	0.0023172	3584.9	0	BL_ORD_ID:11922	31	58	TcCLB.504213.90	inositol polyphosphate kinase-like protein; putative	inositol polyphosphate kinase-like protein, putative	protein phosphorylation/dephosphorylation	N/A	TcChr11-S:204632-206830(+)	732	TMT 6-plex on n-term peptide:1,phosphorylation of S:23,TMT 6-plex on K:26	4	3584.91	1.44491e-07	0	897.736	897.234	2	897.234	0.991324	0.199823	90.6476	8204.11	6841.45	7709.08	6412.96	5261.23	6662.59	1.64082e+06	1.36829e+06	1.54182e+06	1.28259e+06	1.05225e+06	1.33252e+06	17381.6	14435.2	16495.8	13600.6	11082.2	14175.7	19472.4	23622.1	16794.4	13850.5
28357	EM-3rep-phosp-Frac7.FTMS.HCD.28357.28357.5.RT_119.185_min_7151.1_s.dta	aFVPLIPVAQNANPTPESPFLLsPEKDR	0.00795913	3584.9	0	BL_ORD_ID:11922	31	58	TcCLB.504213.90	inositol polyphosphate kinase-like protein; putative	inositol polyphosphate kinase-like protein, putative	protein phosphorylation/dephosphorylation	N/A	TcChr11-S:204632-206830(+)	732	TMT 6-plex on n-term peptide:1,phosphorylation of S:23,TMT 6-plex on K:26	5	3584.91	5.74459e-07	0	718.39	717.988	2	717.989	0.90249	0.110989	0	2087.79	1548.83	1633.1	720.29	851.332	758.045	417558	309766	326620	144058	170266	151609	4423.29	3271.25	3495.09	1527.57	1792.37	1612.86	4955.37	5353.14	3558.35	1555.63
16497	EM-3rep-phosp-Frac9.FTMS.HCD.16497.16497.3.RT_70.040_min_4202.4_s.dta	sAQTGISAPVAVsHYRFSPPR	0.0229821	2536.28	0	BL_ORD_ID:15542	61	81	TcCLB.509967.70	katanin; putative	katanin, putative	ATP binding	N/A	TcChr10-S:187410-189455(+)	681	TMT 6-plex on n-term peptide:1,phosphorylation of S:13	3	2536.28	1.05597e-06	0	846.769	846.434	1	846.435	1.56972	0.559209	NaN	23084.9	16842.7	20904	18814.2	13824.6	14549.8	4.61698e+06	3.36854e+06	4.18079e+06	3.76285e+06	2.76491e+06	2.90996e+06	48908.7	35523.9	44731	39912.4	29118.6	30957	54792	58132	45540.7	40645.7
31051	EM-3rep-phosp-Frac9.FTMS.HCD.31051.31051.3.RT_128.813_min_7728.8_s.dta	emGGtPVEEAVFPETFLDVGQVEEIQQR	1.13688e-06	3458.61	0	BL_ORD_ID:3074	563	590	TcCLB.509167.180	kinesin; putative	kinesin, putative	structural	cytoplasm	TcChr32-S:817855-821208(-)	1117	TMT 6-plex on n-term peptide:1,oxidation of M:2,phosphorylation of T:5	3	3458.62	3.10165e-11	0	1154.55	1153.88	2	1153.88	0.368056	-0.642456	NaN	18958.7	14051.6	16076.5	13554.4	9442.69	14051.8	3.79174e+06	2.81032e+06	3.21529e+06	2.71089e+06	1.88854e+06	2.81036e+06	40166.8	29646.6	34403.7	28746.3	19885	29897.5	44998.5	48514.4	35026.4	29274.5
15189	EM-3rep-phosp-Frac10.FTMS.HCD.15189.15189.4.RT_64.756_min_3885.4_s.dta	lADVHSsKDAYECNPGEDSDADRMER	0.167859	3572.55	0	BL_ORD_ID:16830	398	423	TcCLB.503881.10	kynureninase; putative	kynureninase, putative	metabolic process	cytoplasm	TcChr33-S:735610-737007(+)	465	TMT 6-plex on n-term peptide:1,phosphorylation of S:7,TMT 6-plex on K:8,NEM C:13	4	3572.56	1.51634e-05	0	894.398	894.147	1	894.147	-0.0671215	-1.35952	NaN	41038.5	31583.5	42511	37237.8	28178.5	35720.7	8.20771e+06	6.31671e+06	8.50219e+06	7.44756e+06	5.63569e+06	7.14415e+06	86946.1	66605.8	90966.3	78980.5	59352.3	76001.6	97405	108995	92613	80431.6
14161	EM-3rep-phosp-Frac10.FTMS.HCD.14161.14161.4.RT_60.612_min_3636.7_s.dta	lADVHsSKDAYECnPGEDSDADRmER	6.05322e-05	3589.55	0	BL_ORD_ID:16830	398	423	TcCLB.503881.10	kynureninase; putative	kynureninase, putative	metabolic process	cytoplasm	TcChr33-S:735610-737007(+)	465	TMT 6-plex on n-term peptide:1,phosphorylation of S:6,TMT 6-plex on K:8,NEM C:13,deamidation of N and Q:14,oxidation of M:24	4	3589.54	5.57079e-09	0	898.648	898.392	1	898.397	6.34687	5.05447	0	36801.1	28807.4	38737.8	32937.5	24428.9	28584.9	7.36022e+06	5.76148e+06	7.74756e+06	6.58749e+06	4.88578e+06	5.71698e+06	77968.4	60755.9	82895.3	69866.4	51450.4	60819	87347.4	99422.3	84395.8	71150
17455	EM-3rep-phosp-Frac8.FTMS.HCD.17455.17455.2.RT_74.132_min_4447.9_s.dta	lAEYDALHSSVKPSSPSs	0.124941	2412.2	0	BL_ORD_ID:12284	205	222	TcCLB.511573.10	leucine-rich repeat protein; putative	leucine-rich repeat protein, putative	protein binding	axoneme	TcChr12-S:138102-138770(+)	222	TMT 6-plex on n-term peptide:1,TMT 6-plex on K:12,phosphorylation of S:18	2	2412.2	4.08171e-06	0	1207.61	1207.11	1	1207.11	2.60901	1.86143	NaN	7031.35	5564.92	7711.4	4449.9	5617.98	3065.5	1.40627e+06	1.11298e+06	1.54228e+06	889981	1.1236e+06	613099	14896.9	11745.2	16500	9440.85	11834.9	6522.33	16688.9	19220.1	16798.6	9614.31
17373	EM-3rep-phosp-Frac10.FTMS.HCD.17373.17373.5.RT_73.599_min_4416.0_s.dta	sRPEWVDNFLSPEGDHAVEDDGNSsNEmAKPPPK	0.00193538	4534.15	0	BL_ORD_ID:6756	352	385	TcCLB.504125.60	MCAK-like kinesin; putative	Kinesin-13 3, putative	structural	cell tip, ciliary basal body, ciliary tip, cilium, cytoplasm, nucleus	TcChr26-S:607716-609365(-)	549	TMT 6-plex on n-term peptide:1,phosphorylation of S:25,oxidation of M:28,TMT 6-plex on K:30,TMT 6-plex on K:34	5	4534.14	8.61087e-08	0	908.038	907.834	1	907.837	2.97583	1.68343	0	16654.9	11310.2	15966.3	15275.9	13192.5	12481.2	3.33099e+06	2.26204e+06	3.19327e+06	3.05518e+06	2.6385e+06	2.49624e+06	35285.9	23843.1	34159.4	32404.7	27796.2	26555.8	39530.5	39017.4	34777.7	33000.1
10433	EM-3rep-phosp-Frac10.FTMS.HCD.10433.10433.3.RT_45.603_min_2736.2_s.dta	rEQANTSSATVSsPTAEISR	0.000408528	2400.14	0	BL_ORD_ID:5160	63	82	TcCLB.509589.30	MCAK-like kinesin; putative	Kinesin-13 5, putative	structural	N/A	TcChr14-S:543423-545597(-)	724	TMT 6-plex on n-term peptide:1,phosphorylation of S:13	3	2400.15	1.89907e-08	0	801.392	801.057	1	801.057	0.618831	-0.673572	0	11492.2	8884.93	13571.6	10806.9	8244.84	9799.28	2.29844e+06	1.77699e+06	2.71432e+06	2.16139e+06	1.64897e+06	1.95986e+06	24347.8	18735.7	29042.7	22922.5	17363.5	20849.5	27276.7	30659.6	29568.4	23343.7
29238	EM-3rep-phosp-Frac9.FTMS.HCD.29238.29238.4.RT_121.428_min_7285.7_s.dta	iAAEEIMIGQmPSEEVETLGLsGTFAQR	1.50392e-05	3331.59	0	BL_ORD_ID:5160	511	538	TcCLB.509589.30	MCAK-like kinesin; putative	Kinesin-13 5, putative	structural	N/A	TcChr14-S:543423-545597(-)	724	TMT 6-plex on n-term peptide:1,oxidation of M:11,phosphorylation of S:22	4	3331.59	5.27378e-10	0	834.157	833.905	1	833.906	1.4071	0.396587	NaN	4600.73	3607.81	4694.83	4524.26	3063.59	3389.69	920146	721561	938967	904853	612717	677938	9747.31	7607.2	10046.3	9598	6452.67	7212.11	10919.8	12448.6	10228.1	9774.35
16034	EM-3rep-phosp-Frac9.FTMS.HCD.16034.16034.3.RT_68.243_min_4094.6_s.dta	aENENSSLYETKQtPILR	0.134481	2630.34	0	BL_ORD_ID:5160	115	132	TcCLB.509589.30	MCAK-like kinesin; putative	Kinesin-13 5, putative	structural	N/A	TcChr14-S:543423-545597(-)	724	TMT 6-plex on n-term peptide:1,TMT 6-plex on K:12,phosphorylation of T:14	3	2630.34	5.848e-06	0	878.122	877.786	1	877.787	1.40843	0.397916	100	33814	28499	34293.5	30989.1	18791.4	23405	6.76279e+06	5.69981e+06	6.8587e+06	6.19781e+06	3.75827e+06	4.681e+06	71639.7	60112.7	73391.2	65741.3	39566.8	49797.8	80257.4	98369.7	74719.7	66949.2
25956	EM-3rep-phosp-Frac8.FTMS.HCD.25956.25956.4.RT_108.106_min_6486.4_s.dta	aTsDTEEKFDQCLAPVDFATK	0.000144711	3207.57	0	BL_ORD_ID:6220	174	194	TcCLB.506531.50	metacaspase; putative;cysteine peptidase; Clan CD; family C13; putative	metacaspase, putative	proteolysis	N/A	TcChr6-S:270849-271925(-)	358	TMT 6-plex on n-term peptide:1,phosphorylation of S:3,TMT 6-plex on K:8,NEM C:12,TMT 6-plex on K:21	4	3207.57	4.98728e-09	0	802.9	802.899	0	802.9	1.92521	1.17763	89.7389	16843.2	9328.78	15288.4	12208.7	11025.5	10056.3	3.36865e+06	1.86576e+06	3.05768e+06	2.44174e+06	2.2051e+06	2.01127e+06	35684.8	19667.8	32712.6	25898.1	23226	21396.5	39977.4	32184.9	33304.7	26374
25296	EM-3rep-phosp-Frac3.FTMS.HCD.25296.25296.3.RT_111.129_min_6667.7_s.dta	vGGLVSsMLADDSLVHLR	9.06931e-05	2177.11	0	BL_ORD_ID:8076	95	112	TcCLB.506891.10	Metal-binding domain-containing protein	Metal-binding domain-containing protein	metal ion binding	N/A	TcChr9-S:96806-100072(-)	1088	TMT 6-plex on n-term peptide:1,phosphorylation of S:7	3	2177.11	6.80011e-09	0	727.046	726.711	1	726.712	0.557977	-0.0870042	NaN	4552.1	3399.5	4571.47	6905.98	5244.19	6656.3	910419	679900	914293	1.3812e+06	1.04884e+06	1.33126e+06	9644.27	7156.14	9777.17	14647.3	11053.4	14162.3	10804.4	11710.5	9954.15	14916.5
8810	EM-3rep-phosp-Frac10.FTMS.HCD.8810.8810.4.RT_39.098_min_2345.9_s.dta	eDTQDQNKtHyVTHR	0.00364916	2489.11	0	BL_ORD_ID:12288	182	196	TcCLB.511573.40	mitogen-activated protein kinase; putative	Mitogen-activated protein kinase 10, putative	protein phosphorylation/dephosphorylation	N/A	TcChr12-S:142470-143690(+)	406	TMT 6-plex on n-term peptide:1,TMT 6-plex on K:8,phosphorylation of T:9,phosphorylation of Y:11	4	2489.12	2.56351e-07	0	623.286	623.286	0	623.286	-0.245661	-1.53806	NaN	32185.9	22325.7	31754	30360.6	22662	22841.1	6.43719e+06	4.46513e+06	6.3508e+06	6.07213e+06	4.53239e+06	4.56822e+06	68190.6	47064	67944.6	64408.4	47738.4	48598.1	76393.3	77016.5	69174.5	65591.8
28816	EM-3rep-phosp-Frac5.FTMS.HCD.28816.28816.3.RT_123.251_min_7395.0_s.dta	aDGtPVPIGFTIMQTLEQHVR	0.00110756	2618.3	0	BL_ORD_ID:15136	508	528	TcCLB.510215.10	NADH-dependent fumarate reductase; putative	NADH-dependent fumarate reductase, putative	oxidation-reduction process	ciliary basal body, contractile vacuole, cytoplasm, glycosome	TcChr38-S:372567-375995(+)	1142	TMT 6-plex on n-term peptide:1,phosphorylation of T:4	3	2618.31	4.40225e-08	0	874.112	873.778	1	873.777	-1.34898	-2.28228	32.325	6837.58	3737.02	4422.17	8027.8	8495.79	10014.9	1.36752e+06	747404	884434	1.60556e+06	1.69916e+06	2.00298e+06	14486.4	7864.69	9450.14	17021.5	17913.6	21308.3	16229	12870	9621.2	17334.3
16360	EM-3rep-phosp-Frac6.FTMS.HCD.16360.16360.3.RT_72.543_min_4352.6_s.dta	rRsQVAVGIIAAQAEVIR	0.00203152	2245.26	0	BL_ORD_ID:10144	13	30	TcCLB.509073.40	outer dynein arm docking complex protein (DC2)	outer dynein arm docking complex protein	structural	axonemal dynein complex, axoneme, cilium	TcChr35-S:370474-372429(+)	651	TMT 6-plex on n-term peptide:1,phosphorylation of S:3	3	2245.26	3.46735e-07	0	749.762	749.428	1	749.428	-0.216777	-1.02664	NaN	35153.8	24266	38315.1	33128	27452.1	23152.1	7.03076e+06	4.8532e+06	7.66301e+06	6.6256e+06	5.49042e+06	4.63041e+06	74478.4	51153.8	81983.2	70283.2	57829.3	49259.7	83437.6	83709.1	83467.2	71574.5
20361	EM-3rep-phosp-Frac6.FTMS.HCD.20361.20361.4.RT_88.260_min_5295.6_s.dta	rRsQVAVGIIAAQAEVIRqEEAIK	0.10517	3173.76	0	BL_ORD_ID:10144	13	36	TcCLB.509073.40	outer dynein arm docking complex protein (DC2)	outer dynein arm docking complex protein	structural	axonemal dynein complex, axoneme, cilium	TcChr35-S:370474-372429(+)	651	TMT 6-plex on n-term peptide:1,phosphorylation of S:3,deamidation of N and Q:19,TMT 6-plex on K:24	4	3173.77	1.5815e-05	0	794.7	794.45	1	794.45	-0.0281297	-0.837989	NaN	10456.2	7992.63	10150.2	9374.21	5840.16	6700.79	2.09124e+06	1.59853e+06	2.03005e+06	1.87484e+06	1.16803e+06	1.34016e+06	22153	16855.7	21721.8	19887.6	12298.1	14257	24817.8	27583	22115	20253.1
30897	EM-3rep-phosp-Frac9.FTMS.HCD.30897.30897.3.RT_128.183_min_7691.0_s.dta	nTFELTNGTPTIAGVSFVSNSsPTGGAPSFFR	1.79082e-05	3568.69	0	BL_ORD_ID:2416	552	583	TcCLB.510105.130	phosphatidylinositol-4-phosphate 5-kinase type II beta; putative	phosphatidylinositol-4-phosphate 5-kinase type II beta, putative	protein phosphorylation/dephosphorylation	N/A	TcChr4-S:107793-110555(-)	920	TMT 6-plex on n-term peptide:1,phosphorylation of S:22	3	3568.71	4.4021e-10	0	1191.58	1190.58	3	1190.57	-1.70517	-2.71568	0	11661.8	8538.95	12207.9	8955.83	9012.88	8954.31	2.33235e+06	1.70779e+06	2.44158e+06	1.79117e+06	1.80258e+06	1.79086e+06	24707.1	18012.6	26120.8	18994.3	18987	19051.7	27679.2	29476.2	26593.6	19343.3
7883	EM-3rep-phosp-Frac10.FTMS.HCD.7883.7883.3.RT_35.374_min_2122.4_s.dta	nANMHEGNsDAGDGIQR	0.00553886	2093.87	0	BL_ORD_ID:12080	27	43	TcCLB.506795.40	phosphatidylserine synthase; putative	phosphatidylserine synthase, putative	phosphatidylserine biosynthetic process	N/A	TcChr11-S:416607-418142(+)	511	TMT 6-plex on n-term peptide:1,phosphorylation of S:9	3	2093.88	6.21505e-07	0	699.301	698.967	1	698.967	-0.124745	-1.41715	0	9797.38	7134.16	8528.72	8448.3	6613.44	7228.03	1.95948e+06	1.42683e+06	1.70574e+06	1.68966e+06	1.32269e+06	1.44561e+06	20757.2	15044.9	18247.9	17920.6	13933.2	15378.8	23254.1	24619.8	18578.2	18249.9
20531	EM-3rep-phosp-Frac9.FTMS.HCD.20531.20531.4.RT_86.122_min_5167.3_s.dta	sEPAGCSVGCmItASHNPATDNGLK	0.00510671	3263.47	0	BL_ORD_ID:19698	66	90	TcCLB.508569.80	phosphoacetylglucosamine mutase; putative;acetylglucosaminephosphomutase; putative;N-acetylglucosamine-phosphate mutase; putative	phosphoacetylglucosamine mutase, putative	carbohydrate metabolic process	cytoplasm	TcChr19-S:265503-267335(-)	610	TMT 6-plex on n-term peptide:1,NEM C:6,NEM C:10,oxidation of M:11,phosphorylation of T:13,TMT 6-plex on K:25	4	3263.47	2.50059e-07	0	817.126	816.875	1	816.875	0.246407	-0.764106	4.91862	52618.1	35592	49685.9	39248.7	42271.6	30766.7	1.05236e+07	7.11839e+06	9.93718e+06	7.84973e+06	8.45432e+06	6.15333e+06	111479	75071.3	106298	83261	89068.5	65461	124889	122848	108223	84790.8
22696	EM-3rep-phosp-Frac7.FTMS.HCD.22696.22696.3.RT_96.236_min_5774.1_s.dta	gAFILTAsHNPGGPEEDFGIK	0.00236349	2694.34	0	BL_ORD_ID:15458	127	147	TcCLB.511911.130	phosphoglucomutase	phosphoglucomutase	carbohydrate metabolic process	N/A	TcChr10-S:59311-61113(-)	600	TMT 6-plex on n-term peptide:1,phosphorylation of S:8,TMT 6-plex on K:21	3	2694.34	9.03371e-08	0	899.457	899.123	1	899.122	-0.247845	-1.03935	0	69841	42372.1	64257.2	55077	47938.4	48993.6	1.11321e+07	6.75379e+06	1.02421e+07	8.77885e+06	7.64101e+06	7.80921e+06	117925	71196.3	109572	93105.5	80485.8	83076.7	132110	116507	111556	94816.2
20772	EM-3rep-phosp-Frac9.FTMS.HCD.20772.20772.4.RT_87.095_min_5225.7_s.dta	gVTmAAAAACGDDsVPGYEAGATLKPVAER	2.81025e-05	3556.69	0	BL_ORD_ID:8066	68	97	TcCLB.511419.40	phosphoglycerate kinase; putative	phosphoglycerate kinase, putative	glycolytic process	ciliary plasm, cytoplasm	TcChr9-S:87078-88337(-)	419	TMT 6-plex on n-term peptide:1,oxidation of M:4,NEM C:10,phosphorylation of S:14,TMT 6-plex on K:25	4	3556.7	9.80616e-10	0	890.685	890.182	2	890.183	1.25732	0.246805	NaN	28193.8	18898.2	28912.2	24058.4	20038.8	16925.7	5.63876e+06	3.77964e+06	5.78244e+06	4.81169e+06	4.00776e+06	3.38513e+06	59732.6	39846	61865.3	51041.2	42210.7	36012	66918	65204.8	62985.1	51979
30876	EM-3rep-phosp-Frac7.FTMS.HCD.30876.30876.4.RT_129.473_min_7768.4_s.dta	tTDGGLGIFLTGAEILDEENIRGFENLEDGDsLKNEVK	2.76899e-15	4875.45	0	BL_ORD_ID:2882	766	803	TcCLB.506941.60	phospholipid-translocating P-type ATPase (flippase); putative	phospholipid-translocating P-type ATPase (flippase), putative	ATP binding, metal ion binding	integral component of membrane	TcChr32-S:630319-633972(-)	1217	TMT 6-plex on n-term peptide:1,phosphorylation of S:32,TMT 6-plex on K:34,TMT 6-plex on K:38	4	4875.47	1.06124e-19	0	1220.38	1219.87	2	1219.87	-0.390907	-1.18241	46.7226	182377	133650	213739	171926	106723	95647.1	3.64754e+07	2.67301e+07	4.27477e+07	3.43852e+07	2.13446e+07	1.91294e+07	386392	281788	457444	364807	224672	203505	432871	461123	465724	371510
12408	EM-3rep-phosp-Frac9.FTMS.HCD.12408.12408.4.RT_53.973_min_3238.4_s.dta	iLGKPDDDKNNsKGGSK	0.411281	2997.68	0	BL_ORD_ID:14994	155	171	TcCLB.503841.10	proteasome activator protein pa26; putative	proteasome activator protein pa26, putative	proteolysis	N/A	TcChr38-S:200666-201349(+)	227	TMT 6-plex on n-term peptide:1,TMT 6-plex on K:4,TMT 6-plex on K:9,phosphorylation of S:12,TMT 6-plex on K:13,TMT 6-plex on K:17	4	2997.69	6.76115e-05	0	750.68	750.429	1	750.43	0.677741	-0.332771	75.1774	19099.4	13629.3	17212.9	16529.5	11921	13410.1	3.81988e+06	2.72586e+06	3.44257e+06	3.30589e+06	2.38421e+06	2.68202e+06	40464.8	28740.5	36831.5	35064.1	25111	28532.1	45332.4	47031.5	37498.2	35708.4
11650	EM-3rep-phosp-Frac10.FTMS.HCD.11650.11650.4.RT_50.502_min_3030.1_s.dta	aANTAVKSEEEssLHEAEKEPER	0.0606271	3387.61	0	BL_ORD_ID:19612	287	309	TcCLB.510855.40	proteasome regulatory non-ATPase subunit; putative	proteasome regulatory non-ATPase subunit, putative	proteolysis	N/A	TcChr19-S:126705-127733(-)	342	TMT 6-plex on n-term peptide:1,TMT 6-plex on K:7,phosphorylation of S:12,phosphorylation of S:13,TMT 6-plex on K:19	4	3387.62	2.06285e-06	0	848.163	847.912	1	847.913	0.246981	-1.04542	85.7913	29146.4	15878.7	26792.3	22294	17434.9	16938.1	5.82927e+06	3.17573e+06	5.35846e+06	4.4588e+06	3.48698e+06	3.38763e+06	61750.8	33470.1	57331.7	47295.1	36722	36038.6	69178.9	54771.2	58369.5	48164.1
28304	EM-3rep-phosp-Frac3.FTMS.HCD.28304.28304.3.RT_123.242_min_7394.5_s.dta	tFtLCGTPEYLAPEVIQSR	0.0268519	2558.23	0	BL_ORD_ID:1706	35	53	TcCLB.509805.10	protein kinase A catalytic subunit; putative	cAMP-dependent protein kinase catalytic subunit 3	protein phosphorylation/dephosphorylation	cell tip, cytoplasm	TcChr40-S:949286-949888(+)	200	TMT 6-plex on n-term peptide:1,phosphorylation of T:3,NEM C:5	3	2558.23	1.04114e-06	0	854.087	853.752	1	853.753	1.11041	0.465428	NaN	15054.8	11323	18306.3	25114.1	18452.5	22478.6	3.01096e+06	2.2646e+06	3.66126e+06	5.02281e+06	3.69049e+06	4.49572e+06	31895.7	23826.1	39158.1	53270	38888	47826.8	35732.5	38989.5	39866.9	54248.7
12748	EM-3rep-phosp-Frac10.FTMS.HCD.12748.12748.3.RT_54.919_min_3295.1_s.dta	aAEVSVGEsNTPANTPNNSR	0.145311	2323.07	0	BL_ORD_ID:5480	241	260	TcCLB.503757.40	protein kinase ck2 regulatory subunit; putative	Casein kinase II subunit beta, putative	protein phosphorylation/dephosphorylation	ciliary basal body, ciliary plasm, cytoplasm, nuclear lumen	TcChr16-S:383175-384014(+)	279	TMT 6-plex on n-term peptide:1,phosphorylation of S:9	3	2323.07	7.90806e-06	0	775.365	775.362	0	775.365	3.66791	2.37551	NaN	21487.3	18431.2	24980.9	20919.6	19759	17164.1	4.29746e+06	3.68624e+06	4.99618e+06	4.18392e+06	3.95181e+06	3.43283e+06	45523.9	38872.8	53447.7	44376.5	41629.4	36519.4	51000.1	63612.3	54415.2	45191.8
30600	EM-3rep-phosp-Frac7.FTMS.HCD.30600.30600.2.RT_128.343_min_7700.6_s.dta	iIDFGSSCYLTDNLSsYVQSR	7.60322e-09	2801.29	0	BL_ORD_ID:15736	408	428	TcCLB.506869.60	protein kinase; putative	protein kinase PK4, putative	protein phosphorylation/dephosphorylation	cytoplasm	TcChr10-S:431795-433609(-)	604	TMT 6-plex on n-term peptide:1,NEM C:8,phosphorylation of S:16	2	2801.28	1.75744e-13	0	1402.15	1401.65	1	1401.65	1.54111	0.749612	NaN	6631.58	3906.81	9439.97	9901.07	11461.5	11593.2	1.32632e+06	781362	1.88799e+06	1.98021e+06	2.29229e+06	2.31863e+06	14050	8215.25	20188.2	20995.2	24159	24666.3	15740	13443.6	20553.6	21381
30411	EM-3rep-phosp-Frac7.FTMS.HCD.30411.30411.2.RT_127.574_min_7654.4_s.dta	iIDFGSSCYLTDNLsSYVQSR	1.07753e-11	2801.28	0	BL_ORD_ID:15736	408	428	TcCLB.506869.60	protein kinase; putative	protein kinase PK4, putative	protein phosphorylation/dephosphorylation	cytoplasm	TcChr10-S:431795-433609(-)	604	TMT 6-plex on n-term peptide:1,NEM C:8,phosphorylation of S:15	2	2801.28	2.59382e-16	0	1402.15	1401.65	1	1401.65	0.756734	-0.0347669	98.7722	35991.1	22058.3	42840	44429.5	49042.1	51696	7.19823e+06	4.41166e+06	8.568e+06	8.8859e+06	9.80843e+06	1.03392e+07	76252.4	46435.7	91623.8	94213.4	103368	109991	85424.9	75988.5	93282.3	95944.5
28726	EM-3rep-phosp-Frac9.FTMS.HCD.28726.28726.4.RT_119.355_min_7161.3_s.dta	qAGVGNPPPLSPLQALCSPtATGLSPVLLGEKGDHHLPVSK	6.83802e-06	4728.45	0	BL_ORD_ID:17574	362	402	TcCLB.509231.20	protein kinase; putative	CMGC/RCK protein kinase, putative	protein phosphorylation/dephosphorylation	N/A	TcChr15-S:21228-22991(-)	587	pyro-glu from n-term Q:1,NEM C:17,phosphorylation of T:20,TMT 6-plex on K:32,TMT 6-plex on K:41	4	4728.48	3.48044e-10	0	1183.62	1183.13	2	1183.12	-2.82934	-3.83985	NaN	7029.01	5313.29	6939.43	6780.66	5062.25	5443.75	1.4058e+06	1.06266e+06	1.38789e+06	1.35613e+06	1.01245e+06	1.08875e+06	14892	11202.8	14848.2	14384	10664.2	11582.5	16683.3	18332.4	15116.9	14648.3
23828	EM-3rep-phosp-Frac8.FTMS.HCD.23828.23828.3.RT_99.494_min_5969.6_s.dta	iGLGGIGTFTSSsSSPK	0.0920266	2133.1	0	BL_ORD_ID:2260	387	403	TcCLB.510089.130	protein kinase; putative	CMGC/CLK family protein kinase, putative	protein phosphorylation/dephosphorylation	N/A	TcChr40-S:1756125-1758002(-)	625	TMT 6-plex on n-term peptide:1,phosphorylation of S:13,TMT 6-plex on K:17	3	2133.11	8.08173e-06	0	712.713	712.045	2	712.045	-0.311978	-1.05955	NaN	10433.3	8905.64	12955.1	8834.85	9724.14	7827.92	2.08666e+06	1.78113e+06	2.59102e+06	1.76697e+06	1.94483e+06	1.56558e+06	22104.5	18788.4	27719.2	18740	20485.8	16655.1	24763.5	30745.7	28221	19084.3
24392	EM-3rep-phosp-Frac7.FTMS.HCD.24392.24392.4.RT_103.072_min_6184.3_s.dta	rVLtPSGGFDDTYSSGIELFDEIHR	0.000414676	3119.47	0	BL_ORD_ID:12930	305	329	TcCLB.510257.130	protein kinase; putative	CAMK/CAMKL family protein kinase, putative	protein phosphorylation/dephosphorylation	N/A	TcChr20-S:442613-444472(-)	619	TMT 6-plex on n-term peptide:1,phosphorylation of T:4	4	3119.48	1.65052e-08	0	781.379	780.877	2	780.877	0.0454249	-0.746076	NaN	5179.84	3348.13	5184.52	4504.23	3455.44	4239.36	1.03597e+06	669625	1.0369e+06	900845	691088	847872	10974.2	7058.29	11094	9553.54	7278.26	9019.92	12294.3	11550.3	11294.8	9729.07
20206	EM-3rep-phosp-Frac7.FTMS.HCD.20206.20206.3.RT_86.324_min_5179.5_s.dta	tTVASAATAVASVTsPPLLSSAVSSK	0.000303819	2940.58	0	BL_ORD_ID:240	28	53	TcCLB.509099.150	protein kinase; putative	cdc2-related kinase 9	protein phosphorylation/dephosphorylation	nucleus	TcChr23-S:390134-392554(-)	806	TMT 6-plex on n-term peptide:1,phosphorylation of S:15,TMT 6-plex on K:26	3	2940.58	1.87531e-08	0	981.538	981.201	1	981.203	2.00465	1.21315	95.7726	12607.7	7605.99	13614.6	10950.6	9090.82	10455.9	2.52153e+06	1.5212e+06	2.72292e+06	2.19012e+06	1.81816e+06	2.09117e+06	26711.2	16031.2	29132.9	23226.1	19148.2	22246.5	29924.3	26233.8	29660.2	23652.8
17341	EM-3rep-phosp-Frac9.FTMS.HCD.17341.17341.5.RT_73.341_min_4400.5_s.dta	iDPLQVDHLmHPNIEPGAAKsNKPIGK	0.000109992	3931.15	0	BL_ORD_ID:9394	396	422	TcCLB.510101.140	pyruvate phosphate dikinase; putative	pyruvate phosphate dikinase, putative	pyruvate metabolic process	contractile vacuole, glycosome	TcChr27-S:114555-117296(-)	913	TMT 6-plex on n-term peptide:1,oxidation of M:10,TMT 6-plex on K:20,phosphorylation of S:21,TMT 6-plex on K:23,TMT 6-plex on K:27	5	3931.16	1.65502e-08	0	787.64	787.239	2	787.239	0.402286	-0.608227	0	12383.3	10750.6	12147.1	8793.02	6705.58	7983.72	2.47667e+06	2.15013e+06	2.42942e+06	1.7586e+06	1.34112e+06	1.59674e+06	26235.9	22689.2	25995.8	18650.8	14119.4	16986.6	29391.8	37129.1	26466.4	18993.5
10476	EM-3rep-phosp-Frac7.FTMS.HCD.10476.10476.3.RT_47.874_min_2872.4_s.dta	rLAtPPPVDGR	0.227143	1486.79	0	BL_ORD_ID:3566	104	114	TcCLB.511445.20	radial spoke protein 3; putative	radial spoke protein 3, putative	structural	axoneme, cytoplasm	TcChr39-S:294511-295515(+)	334	TMT 6-plex on n-term peptide:1,phosphorylation of T:4	3	1486.79	5.40946e-05	0	496.603	496.603	0	496.603	0.583981	-0.20752	99.5867	75791.8	51453.5	73327.2	66048.8	41885	57054.4	1.23811e+06	840528	1.19785e+06	1.07895e+06	684220	932024	13115.6	8860.88	12817.2	11443.3	7203.99	9915.14	14693.3	14500.1	13049.3	11653.6
12708	EM-3rep-phosp-Frac10.FTMS.HCD.12708.12708.3.RT_54.760_min_3285.6_s.dta	lRLESNsDTDQPAATR	0.132143	2082	0	BL_ORD_ID:8358	28	43	TcCLB.507611.10	retrotransposon hot spot (RHS) protein; putative	retrotransposon hot spot (RHS) protein, putative	N/A	N/A	TcChr37-S:1391-4231(-)	946	TMT 6-plex on n-term peptide:1,phosphorylation of S:7	3	2082	9.94681e-06	0	695.006	695.005	0	695.006	1.2712	-0.0212005	0	48813.1	40327.7	50830.6	45564.8	33362.1	38904.3	8.08952e+06	6.68329e+06	8.42386e+06	7.55121e+06	5.52891e+06	6.4474e+06	85694.1	70478.5	90128.9	80088.6	58226.7	68589.3	96002.3	115333	91760.4	81560.1
9053	EM-3rep-phosp-Frac10.FTMS.HCD.9053.9053.3.RT_40.066_min_2403.9_s.dta	sGRPEEGHYGNEESQsPTVPR	8.34086e-06	2434.01	0	BL_ORD_ID:8358	2	22	TcCLB.507611.10	retrotransposon hot spot (RHS) protein; putative	retrotransposon hot spot (RHS) protein, putative	Unknown function	N/A	TcChr37-S:1391-4231(-)	946	acetylation of protein n-term:1,phosphorylation of S:16	3	2434.02	7.08955e-10	0	812.682	812.347	1	812.348	1.11949	-0.172912	NaN	6560.23	5536.9	8441.8	6470.15	6051.33	6632.35	1.31205e+06	1.10738e+06	1.68836e+06	1.29403e+06	1.21027e+06	1.32647e+06	13898.8	11676.9	18063	13722.1	12747.5	14111.4	15570.7	19108.4	18390	13974.2
24494	EM-3rep-phosp-Frac7.FTMS.HCD.24494.24494.4.RT_103.487_min_6209.2_s.dta	gTPPDKEFAPCnGWGmIVLsSPK	0.0205485	3339.67	0	BL_ORD_ID:7556	599	621	TcCLB.511587.30	retrotransposon hot spot protein (RHS; pseudogene); putative	retrotransposon hot spot protein (RHS, pseudogene), putative	N/A	N/A	TcChr18-S:60922-63873(-)	984	TMT 6-plex on n-term peptide:1,TMT 6-plex on K:6,NEM C:11,deamidation of N and Q:12,oxidation of M:16,phosphorylation of S:20,TMT 6-plex on K:23	4	3339.65	7.4389e-07	0	836.428	835.921	2	835.926	7.15812	6.36662	NaN	9929.28	7029.25	8403.39	7498.93	6361.92	5679.16	1.98586e+06	1.40585e+06	1.68068e+06	1.49979e+06	1.27238e+06	1.13583e+06	21036.6	14827.4	17980.1	15908.5	13402.8	12083.3	23567.1	24263.8	18305.5	16200.8
18849	EM-3rep-phosp-Frac9.FTMS.HCD.18849.18849.3.RT_79.360_min_4761.6_s.dta	gGYTmEEDLNAtSLNDMGDSVPKPR	4.82867e-08	3250.49	0	BL_ORD_ID:4598	163	187	TcCLB.510755.120	RNA-binding protein; putative	RNA-binding protein, putative	nucleic acid binding	cytoplasm	TcChr39-S:1659255-1660085(-)	276	TMT 6-plex on n-term peptide:1,oxidation of M:5,phosphorylation of T:12,TMT 6-plex on K:23	3	3250.49	1.55218e-12	0	1084.84	1084.5	1	1084.51	1.11946	0.108952	99.8635	12606.4	10634.9	13462.7	11494.4	9323.94	11525.3	2.52127e+06	2.12699e+06	2.69253e+06	2.29887e+06	1.86479e+06	2.30507e+06	26708.4	22432.5	28807	24378.1	19640.4	24522	29921.2	36709	29328.4	24826
7129	EM-3rep-phosp-Frac11.FTMS.HCD.7129.7129.4.RT_32.780_min_1966.8_s.dta	kGSNNNQQANSGAtPAQAEEK	0.470409	2910.44	0	BL_ORD_ID:1392	461	481	TcCLB.506211.60	RNA-binding protein; putative	RNA-binding protein, putative	metal ion binding	N/A	TcChr40-S:414089-415729(-)	546	TMT 6-plex on K | TMT 6-plex on n-term peptide:1,phosphorylation of T:14,TMT 6-plex on K:21	4	2910.45	1.90003e-05	0	728.869	728.618	1	728.618	0.0749239	-1.00498	NaN	11802	7785.64	11052.7	9068.38	7661.79	6880.22	2.3604e+06	1.55713e+06	2.21053e+06	1.81368e+06	1.53236e+06	1.37604e+06	25004.2	16419.4	23650.1	19237.9	16139.2	14638.8	28012	26869.1	24078.2	19591.4
9734	EM-3rep-phosp-Frac10.FTMS.HCD.9734.9734.3.RT_42.798_min_2567.9_s.dta	kGsNNNqQANSGATPAQAEEK	9.18334e-06	2911.43	0	BL_ORD_ID:1392	461	481	TcCLB.506211.60	RNA-binding protein; putative	RNA-binding protein, putative	metal ion binding	N/A	TcChr40-S:414089-415729(-)	546	TMT 6-plex on K | TMT 6-plex on n-term peptide:1,phosphorylation of S:3,deamidation of N and Q:7,TMT 6-plex on K:21	3	2911.43	2.73868e-10	0	971.484	971.483	0	971.484	0.768076	-0.524327	98.8362	51867.7	36127.2	54606.1	45591.6	34233	24845.5	1.03735e+07	7.22545e+06	1.09212e+07	9.11831e+06	6.84661e+06	4.9691e+06	109889	76174.4	116852	96741.2	72098.3	52862.7	123108	124653	118968	98518.7
25009	EM-3rep-phosp-Frac4.FTMS.HCD.25009.25009.3.RT_108.446_min_6506.8_s.dta	lVDALLQDPTAsPK	0.0177572	2005.09	0	BL_ORD_ID:16882	518	531	TcCLB.509979.60	sec1 family transport protein; putative	sec1 family transport protein, putative	vesicle-mediated transport	Golgi apparatus	TcChr33-S:844998-846881(+)	627	TMT 6-plex on n-term peptide:1,phosphorylation of S:12,TMT 6-plex on K:14	3	2005.09	2.72476e-06	0	669.705	669.371	1	669.371	0.446132	-0.35396	86.674	33187.8	27776.2	36453.4	32519.4	27290.7	25877.2	6.63756e+06	5.55525e+06	7.29068e+06	6.50389e+06	5.45814e+06	5.17544e+06	70313.1	58577.7	77997.1	68984.9	57493.1	55057.9	78771.2	95857.8	79408.9	70252.4
24987	EM-3rep-phosp-Frac5.FTMS.HCD.24987.24987.4.RT_107.768_min_6466.1_s.dta	lVDALLQDPtASPK	0.428841	2005.09	0	BL_ORD_ID:16882	518	531	TcCLB.509979.60	sec1 family transport protein; putative	sec1 family transport protein, putative	vesicle-mediated transport	Golgi apparatus	TcChr33-S:844998-846881(+)	627	TMT 6-plex on n-term peptide:1,phosphorylation of T:10,TMT 6-plex on K:14	4	2005.09	7.88456e-05	0	502.28	502.28	0	502.28	0.377582	-0.555726	0	4447.97	3212.39	5373.38	2960.77	3187.6	2453.14	889595	642478	1.07468e+06	592155	637520	490628	9423.67	6778.24	11499	6280.61	6712.77	5219.45	10557.3	11092.1	11707.1	6396
30001	EM-3rep-phosp-Frac9.FTMS.HCD.30001.30001.5.RT_124.532_min_7471.9_s.dta	tPETTLGGVLAEVAPsLISHSFPLELGESqTAAHQELHPDLGR	0.000771383	4814.39	0	BL_ORD_ID:11520	546	588	TcCLB.484949.9	serine/threonine protein kinase; putative	AGC/RSK family serine/threonine kinase, putative (fragment)	protein phosphorylation/dephosphorylation	N/A	TcChr36-S:792017-793984(+)	656	TMT 6-plex on n-term peptide:1,phosphorylation of S:16,deamidation of N and Q:30	5	4814.4	3.73877e-08	0	964.491	963.887	3	963.889	1.66004	0.649527	27.4927	4238.93	2545.37	3969.19	3597.54	2930.75	2796.5	847787	509074	793838	719508	586150	559301	8980.79	5365.2	8492.72	7631.77	6174.06	5950.01	10061.1	8779.73	8646.45	7772
11445	EM-3rep-phosp-Frac10.FTMS.HCD.11445.11445.4.RT_49.676_min_2980.6_s.dta	gGHPLHQENQmsEEDEDVEALPHSVSQR	4.5536e-10	3479.52	0	BL_ORD_ID:11520	408	435	TcCLB.484949.9	serine/threonine protein kinase; putative	AGC/RSK family serine/threonine kinase, putative (fragment)	protein phosphorylation/dephosphorylation	N/A	TcChr36-S:792017-793984(+)	656	TMT 6-plex on n-term peptide:1,oxidation of M:11,phosphorylation of S:12	4	3479.53	3.10741e-14	0	871.391	870.889	2	870.889	0.638398	-0.654005	NaN	6678.43	5313.99	6356.77	5387.2	3633.92	4725.38	1.33569e+06	1.0628e+06	1.27135e+06	1.07744e+06	726783	945077	14149.2	11210.5	13603.7	11427.1	7652.14	10054	15851.2	18345.1	13850	11637.1
19485	EM-3rep-phosp-Frac7.FTMS.HCD.19485.19485.3.RT_83.486_min_5009.2_s.dta	lLLHPSHnGAAALASASIEsPVGR	0.000464697	2677.38	0	BL_ORD_ID:13898	18	41	TcCLB.507757.50	serine/threonine-protein phosphatase PP1; putative	serine/threonine-protein phosphatase PP1, putative	protein phosphorylation/dephosphorylation	N/A	TcChr31-S:294995-296050(+)	351	TMT 6-plex on n-term peptide:1,deamidation of N and Q:8,phosphorylation of S:20	3	2677.38	2.12307e-08	0	893.467	893.467	0	893.467	0.45636	-0.335141	0	17003.9	15473.1	19613	13402.8	14256.7	12531	3.40078e+06	3.09461e+06	3.92261e+06	2.68056e+06	2.85135e+06	2.5062e+06	36025.2	32652.5	41965.8	28427.8	30033.2	26661.8	40358.7	53433.3	42725.4	28950.1
17251	EM-3rep-phosp-Frac7.FTMS.HCD.17251.17251.3.RT_74.674_min_4480.4_s.dta	lLLHPSHNGAAALAsASIESPVGR	7.27571e-05	2676.39	0	BL_ORD_ID:13898	18	41	TcCLB.507757.50	serine/threonine-protein phosphatase PP1; putative	serine/threonine-protein phosphatase PP1, putative	protein phosphorylation/dephosphorylation	N/A	TcChr31-S:294995-296050(+)	351	TMT 6-plex on n-term peptide:1,phosphorylation of S:15	3	2676.39	3.61472e-09	0	893.474	893.139	1	893.14	1.03013	0.238628	0	6778.95	5358.02	7761.8	5467.36	5240.76	3490.53	1.35579e+06	1.0716e+06	1.55236e+06	1.09347e+06	1.04815e+06	698106	14362.2	11303.2	16608.7	11600.1	11038.9	7426.66	16089.8	18496.8	16909.4	11813.2
17959	EM-3rep-phosp-Frac9.FTMS.HCD.17959.17959.5.RT_75.820_min_4549.2_s.dta	hICPAALVPPRAPsVDGHLK	0.0197211	2740.46	0	BL_ORD_ID:6424	234	253	TcCLB.511065.10	STOP axonemal protein; putative	STOP axonemal protein, putative	structural	axoneme, cytoskeleton	TcChr26-S:148493-149293(+)	266	TMT 6-plex on n-term peptide:1,NEM C:3,phosphorylation of S:14,TMT 6-plex on K:20	5	2740.47	2.08226e-06	0	549.301	549.1	1	549.101	0.674323	-0.33619	NaN	13836.3	9558.08	14125.4	12523.8	8933.04	10569.4	2.76726e+06	1.91162e+06	2.82508e+06	2.50477e+06	1.78661e+06	2.11388e+06	29314.2	20151.2	30227	26566	18814.2	22488.1	32840.5	32975.9	30774.1	27054.1
16910	EM-3rep-phosp-Frac6.FTMS.HCD.16910.16910.4.RT_74.681_min_4480.9_s.dta	hICPAALVPPRAPsVDGHLK	6.29081e-08	2740.46	0	BL_ORD_ID:6424	234	253	TcCLB.511065.10	STOP axonemal protein; putative	STOP axonemal protein, putative	structural	axoneme, cytoskeleton	TcChr26-S:148493-149293(+)	266	TMT 6-plex on n-term peptide:1,NEM C:3,phosphorylation of S:14,TMT 6-plex on K:20	4	2740.47	5.19172e-12	0	686.375	686.124	1	686.124	1.05779	0.247931	NaN	407422	316130	416944	395939	240440	308679	3.92623e+07	3.04646e+07	4.01799e+07	3.81557e+07	2.31707e+07	2.97467e+07	415914	321181	429930	404714	243963	316454	465945	525587	437712	412150
28324	EM-3rep-phosp-Frac8.FTMS.HCD.28324.28324.4.RT_117.710_min_7062.6_s.dta	sFRGDEsLGqALPFDAIATYTADYPPK	0.00135216	3468.69	0	BL_ORD_ID:6424	168	194	TcCLB.511065.10	STOP axonemal protein; putative	STOP axonemal protein, putative	structural	axoneme, cytoskeleton	TcChr26-S:148493-149293(+)	266	TMT 6-plex on n-term peptide:1,phosphorylation of S:7,deamidation of N and Q:10,TMT 6-plex on K:27	4	3468.69	4.16961e-08	0	868.431	868.18	1	868.181	1.01224	0.264667	NaN	4956.51	3077.96	6453.48	3347.32	3347.15	4599.23	991301	615592	1.2907e+06	669463	669430	919846	10501.1	6492.31	13811.5	7096.44	7046.93	9785.59	11764.3	10624.2	14061.5	7226.82
13664	EM-3rep-phosp-Frac10.FTMS.HCD.13664.13664.5.RT_58.616_min_3517.0_s.dta	kAHRDPmtPTGSSLTSAPHGISVVGITPR	9.25459e-05	3523.83	0	BL_ORD_ID:3844	702	730	TcCLB.504153.150	Unc104-like kinesin; putative	Unc104-like kinesin, putative	structural	cytoplasm	TcChr39-S:690617-695212(-)	1531	TMT 6-plex on K | TMT 6-plex on n-term peptide:1,oxidation of M:7,phosphorylation of T:8	5	3523.84	4.77237e-09	0	706.176	705.775	2	705.774	-0.775876	-2.06828	NaN	15743.1	13159.5	18310	16267.8	11445.4	14089.7	3.14862e+06	2.63189e+06	3.662e+06	3.25357e+06	2.28908e+06	2.81794e+06	33354.1	27748.3	39182	34507.1	24105	29978.1	37366.3	45407.9	39891.2	35141.1
[truncated: 11 more columns]
