# Supplementary material for: Reprogramming of Trypanosoma cruzi metabolism triggered by parasite interaction with the host cell extracellular matrix
Source: PLoS Negl Trop Dis. 2019 Feb 6;13(2):e0007103. doi: 10.1371/journal.pntd.0007103 (PMC6380580; doi:10.1371/journal.pntd.0007103)
Supplement: S3 Table — Phosphopeptides identified with significant differences between Ty and MTy extracts (T-Student Test, p < 0.05 for TMT normalized quantification (PCN manual values)). Putative kinase family able to phosphorylate each one of the substrates and the peptide sequence surrounding the phosphorylation site, are represented in the Table. The score calculated by GPS algorithm evaluates the potential of the phosphorylation. (XLS) [file pntd.0007103.s007.xls]

## Sheet: Sheet1
Peptide	E-value	Mass	Defline	Protein Name	Chromossome location	Length	p-value	Average Ty	Average Mty	Ratio (Mty/Ty)	p-value	log neg p-value	Defline	Phosphosite position	Residue	Kinase family	Putative phosphopeptide	Score
eNFAGAGLPEKLEDFADDsEGETDDENYR	0.00162748	3770.65	TcCLB.504423.30	hypothetical protein; conserved	TcChr33-S:642106-644571(+)	821	1.09e-07	37256.9	74084.4	1.98848	0.0161196	0.991664	TcCLB.504423.30	19	S	AGC/GRK	LEDFADDSEGETDDE	7.991
hGEnGNDDDsEPENNDLSR	6.1e-13	2422.93	TcCLB.507559.60	hypothetical protein; conserved	TcChr27-S:780427-782217(+)	596	1.72e-16	32252.2	24675.5	0.765079	0.0225979	-0.38632	TcCLB.507559.60	10	S	AGC/GRK	ENGNDDDSEPENNDL	7.991
aAEVSVGEsNTPANTPNNSR	0.145311	2323.07	TcCLB.503757.40	protein kinase ck2 regulatory subunit; putative	TcChr16-S:383175-384014(+)	279	7.91e-06	56342.5	42734.8	0.758482	0.0498877	-0.398813	TcCLB.503757.40	9	S	AGC/GRK	AEVSVGESNTPANTP	7.991
dRWVSLLqQNGQDAPPNEEMPEDDDADsKNEEGLRDDDGEVDEAAVR	0.000397285	5807.56	TcCLB.503953.10	hypothetical protein; conserved	TcChr21-S:507066-508667(-)	533	1.02e-07	28107.8	19788.4	0.704018	0.0255623	-0.506316	TcCLB.503953.10	28	S	AGC/GRK	PEDDDADSKNEEGLR	7.991
iDDLEVKICRTLEGVSAVMEsTQLPR	0.180753	3564.84	TcCLB.511313.30	formin; putative	TcChr17-S:349575-353111(-)	1178	5.48e-06	10959.3	30811.3	2.81142	0.0051694	1.4913	TcCLB.511313.30	21	S	AGC/GRK/BARK/BARK1	GVSAVMESTQLPR**	5.269
dCHLLGTFDLsGIPPAPR	4.34e-08	2342.14	TcCLB.511211.160	heat shock protein 70 (hsp70); putative	TcChr30-S:685241-687205(-)	654	2.32e-12	37880.7	55026.3	1.45262	0.0173434	0.538656	TcCLB.511211.160	11	S	AGC/GRK/BARK/BARK1	LLGTFDLSGIPPAPR	5.269
aALDEVTAFLLQQTTAPDFsGMTPTLSR	1.18e-09	3289.61	TcCLB.503855.60	hypothetical protein; conserved	TcChr8-S:130083-131156(-)	357	3.02e-14	33929.8	41166.5	1.21329	0.0116055	0.278919	TcCLB.503855.60	20	S	AGC/GRK/BARK/BARK1	QTTAPDFSGMTPTLS	5.269
gLNLTNCDGRPLtR	0.054717	1962.96	TcCLB.508265.100	hypothetical protein; conserved	TcChr11-S:473721-477221(+)	1166	4.82e-06	42245.6	33553.6	0.794251	0.035639	-0.332333	TcCLB.508265.100	13	T	AGC/GRK/BARK/BARK1	NCDGRPLTR******	5.269
gHNGATESLVHAGKGSEENDAGsLLSIHmEYVR	0.00162852	4018.92	TcCLB.511751.200	epsilon-adaptin; putative;AP-1/4 adapter complex gamma/epsilon subunit; putative	TcChr32-S:456921-459950(+)	1009	6.64e-08	45454	35296.9	0.776542	0.0395588	-0.364864	TcCLB.511751.200	23	S	AGC/GRK/BARK/BARK1	SEENDAGSLLSIHME	5.269
hVTPIPAVLAVEGVSSLSQPAEmPHsSPLISGVTRPKPAPR	1.13e-08	4763.55	TcCLB.506811.40	hypothetical protein; conserved	TcChr39-S:792078-795329(-)	1083	1.32e-12	34612.6	26333.9	0.760817	0.0238455	-0.394379	TcCLB.506811.40	26	S	AGC/GRK/BARK/BARK1	QPAEMPHSSPLISGV	5.269
iLHPGnHTIRVTPTGGtAYNGTVGESWTAPR	4.22e-05	3569.77	TcCLB.506163.30	hypothetical protein; conserved	TcChr30-S:145770-146531(-)	253	1.33e-09	33042.5	24307.3	0.735638	0.0215969	-0.442932	TcCLB.506163.30	17	T	AGC/GRK/BARK/BARK1	RVTPTGGTAYNGTVG	5.269
dRELLPPLAESPFGPFPPCHGsRSEAK	0.201709	3596.79	TcCLB.506887.20	hypothetical protein; conserved	TcChr39-S:1077890-1078849(-)	319	6.15e-06	19031.4	13969.7	0.734033	0.0115726	-0.446084	TcCLB.506887.20	22	S	AGC/GRK/BARK/BARK1	PFPPCHGSRSEAK**	5.269
hSLLsSPGnK	0.156528	1577.82	TcCLB.511311.70	hypothetical protein; conserved	TcChr17-S:323644-337437(-)	4597	3.12e-05	13402.3	9663.91	0.721065	0.0311911	-0.471799	TcCLB.511311.70	5	S	AGC/GRK/BARK/BARK1	***HSLLSSPGNK**	5.269
qMLQETANGGCDDEEVSGTsVDKVDSIFALRR	9.17e-05	4132.94	TcCLB.506677.30	hypothetical protein; conserved	TcChr20-S:121373-122128(+)	251	3.55e-09	56511.6	40486.8	0.716433	0.0353914	-0.481096	TcCLB.506677.30	20	S	AGC/GRK/BARK/BARK1	DEEVSGTSVDKVDSI	5.269
tLHEEPNALEIADTAGDVsALASSATDLVTLGK	1.33e-14	3846.95	TcCLB.506633.20	hypothetical protein; conserved	TcChr34-S:689358-694220(+)	1620	3.43e-19	9359.5	6648.02	0.710296	0.0221132	-0.493507	TcCLB.506633.20	19	S	AGC/GRK/BARK/BARK1	ADTAGDVSALASSAT	5.269
gRADGPSLCSDSVHLNHsAHTDAEFLHPR	1.04e-05	3559.62	TcCLB.509453.79	hypothetical protein; conserved	TcChr15-S:351595-353895(-)	766	7.23e-10	30017.8	20895.3	0.696095	0.0207567	-0.522643	TcCLB.509453.79	18	S	AGC/GRK/BARK/BARK1	DSVHLNHSAHTDAEF	5.269
gVTmAAAAACGDDsVPGYEAGATLKPVAER	2.81e-05	3556.69	TcCLB.511419.40	phosphoglycerate kinase; putative	TcChr9-S:87078-88337(-)	419	9.81e-10	65036	45044.5	0.692609	0.0147135	-0.529888	TcCLB.511419.40	14	S	AGC/GRK/BARK/BARK1	AAACGDDSVPGYEAG	5.269
aDAVEPVPsDHPFVSEK	0.0781539	2361.16	TcCLB.511303.140	hypothetical protein; conserved	TcChr17-S:235539-237671(-)	710	4.03e-06	37156.1	25712.9	0.692025	0.0450036	-0.531104	TcCLB.511303.140	9	S	AGC/GRK/BARK/BARK1	DAVEPVPSDHPFVSE	5.269
tGQLVVRPPNLsASLNGR	0.0482588	2187.17	TcCLB.506945.50	hypothetical protein; conserved	TcChr32-S:899948-902350(+)	800	6.66e-06	12482.9	8620.4	0.690578	0.0254865	-0.534123	TcCLB.506945.50	12	S	AGC/GRK/BARK/BARK1	VVRPPNLSASLNGR*	5.269
aFVPLIPVAQNANPTPESPFLLsPEKDR	0.0023172	3584.9	TcCLB.504213.90	inositol polyphosphate kinase-like protein; putative	TcChr11-S:204632-206830(+)	732	1.44e-07	19963	13467.7	0.674636	0.0345067	-0.567818	TcCLB.504213.90	23	S	AGC/GRK/BARK/BARK1	PESPFLLSPEKDR**	5.269
aENENSSLYETKQtPILR	0.134481	2630.34	TcCLB.509589.30	MCAK-like kinesin; putative	TcChr14-S:543423-545597(-)	724	5.85e-06	84448.9	53645.6	0.635243	0.0357446	-0.65462	TcCLB.509589.30	14	T	AGC/GRK/BARK/BARK1	SLYETKQTPILR***	5.269
dMTHPSHGFFFLADTPtVTSQR	0.167737	2800.27	TcCLB.507667.11	hypothetical protein; conserved (fragment)	TcChr26-S:667748-668671(-)	308	7.52e-06	16339.3	9467.61	0.579439	0.000669897	-0.787271	TcCLB.507667.11	17	T	AGC/GRK/BARK/BARK1	FFLADTPTVTSQR**	5.269
sLASITqIGDVSEEtGTPVGDVILGR	0.0029364	2923.46	TcCLB.506795.20	hypothetical protein; conserved	TcChr11-S:420464-422950(+)	828	1.26e-07	2595.72	1057.27	0.407312	0.037868	-1.29579	TcCLB.506795.20	15	T	AGC/GRK/BARK/BARK1	IGDVSEETGTPVGDV	5.269
aFVPLIPVAQNANPTPESPFLLsPEKDR	0.00795913	3584.9	TcCLB.504213.90	inositol polyphosphate kinase-like protein; putative	TcChr11-S:204632-206830(+)	732	5.74e-07	4622.29	1723.43	0.372851	0.00670577	-1.42333	TcCLB.504213.90	23	S	AGC/GRK/BARK/BARK1	PESPFLLSPEKDR**	5.269
iFsVGTLTEmNSTSIVHREEYEQLQAYTR	0.0192813	3726.78	TcCLB.506735.50	hypothetical protein; conserved	TcChr14-S:274213-277638(-)	1141	6.38e-07	13300.2	10556.3	0.7937	0.0461936	-0.333335	TcCLB.506735.50	3	S	AGC/NDR/NDR/NDR1	*****IFSVGTLTEM	9
nSCAANIFGGPPLEQKPPRPFRPSqLLtYEEAPNLSK	0.0594035	4959.56	TcCLB.508719.70	flagellum targeting protein kharon1; putative (KH1)	TcChr37-S:375185-376402(+)	405	3.7e-06	32285.2	39083.3	1.21056	0.0243711	0.275678	TcCLB.508719.70	28	T	AGC/PKC/PKCa/PRKCA	FRPSQLLTYEEAPNL	7.372
fSTTKPEPETASVPEEHRGsR	0.0076182	2879.42	TcCLB.509157.120	hypothetical protein; conserved	TcChr35-S:738123-741278(+)	1051	3.11e-07	104545	81324.3	0.77789	0.037228	-0.362362	TcCLB.509157.120	20	S	AGC/PKC/PKCa/PRKCA	VPEEHRGSR******	7.372
yRLPFDADVVsADNTESALPK	2.34e-07	2845.43	TcCLB.508731.9	hypothetical protein; conserved (fragment)	TcChr14-S:395073-396329(-)	419	8.13e-12	39624.4	30793	0.777122	0.0293733	-0.363787	TcCLB.508731.9	11	S	AGC/PKC/PKCa/PRKCA	PFDADVVSADNTESA	7.372
yRLPFDADVVsADNTESALPK	0.480453	2845.43	TcCLB.508731.9	hypothetical protein; conserved (fragment)	TcChr14-S:395073-396329(-)	419	2.12e-05	25422.2	19382.7	0.762434	0.00219888	-0.391316	TcCLB.508731.9	11	S	AGC/PKC/PKCa/PRKCA	PFDADVVSADNTESA	7.372
qSVPVSQELsFIYDLK	0.000507905	2390.25	TcCLB.506925.110	hypothetical protein; conserved	TcChr39-S:150547-151371(-)	274	3.83e-08	11634.9	8705.68	0.748239	0.0328618	-0.418428	TcCLB.506925.110	10	S	AGC/PKC/PKCa/PRKCA	VPVSQELSFIYDLK*	7.372
hICPAALVPPRAPsVDGHLK	6.29e-08	2740.46	TcCLB.511065.10	STOP axonemal protein; putative	TcChr26-S:148493-149293(+)	266	5.19e-12	476415	333690	0.700419	0.0427698	-0.51371	TcCLB.511065.10	14	S	AGC/PKC/PKCa/PRKCA	LVPPRAPSVDGHLK*	7.372
fKAHDTESSsFSLLHGSAR	0.405332	2614.29	TcCLB.504147.240	hypothetical protein; conserved	TcChr37-S:547427-550978(+)	1183	2.08e-05	53372.6	38770.5	0.726412	0.0386739	-0.46114	TcCLB.504147.240	10	S	Atypical/PDHK/PDHK	AHDTESSSFSLLHGS	5.455
lSFLDSFRSsGGGsFVSQDESLGINPDETHTR	0.132059	3830.68	TcCLB.506399.30	hypothetical protein; conserved	TcChr26-S:292151-293980(-)	609	9.23e-06	9391.63	17424.6	1.85533	0.0123662	0.891677	TcCLB.506399.30	14	S	Atypical/PDHK/PDHK/PDK1	FRSSGGGSFVSQDES	4.74
sETLNLALLRHsDTGNLR	0.0233242	2318.19	TcCLB.511363.4	hypothetical protein; conserved	TcChr40-S:176639-177388(-)	250	1.61e-06	73829.4	58532.6	0.792809	0.03219	-0.334954	TcCLB.511363.4	12	S	Atypical/PDHK/PDHK/PDK1	NLALLRHSDTGNLR*	4.74
eLEENSGEVAGsFLNDTREETSDVVsLGHPEMDGLR	5.72e-07	4306.88	TcCLB.510055.50	hypothetical protein; conserved	TcChr17-S:517771-520698(+)	975	6.24e-11	23145.1	38856.9	1.67883	0.0129567	0.747459	TcCLB.510055.50	12	S	Atypical/PIKK/FRAP/TOR2	NSGEVAGSFLNDTRE	4.986
vATLTGSNEDGSsSPRETGEVINAAAVPLPSGVGR	3.41e-06	3703.82	TcCLB.506773.10	hypothetical protein; conserved	TcChr27-S:237700-239475(-)	591	1.01e-10	42666	33276.7	0.779935	0.0193323	-0.358575	TcCLB.506773.10	13	S	CAMK/CAMKL/AMPK/AMPKA2	GSNEDGSSSPRETGE	9.162
tVPLGFTFsFPTEQK	0.0165279	2236.15	TcCLB.508951.20	hexokinase; putative	TcChr5-S:117169-118584(-)	471	1.61e-06	29528.3	22471	0.760999	0.000207456	-0.394034	TcCLB.508951.20	9	S	CAMK/CAMKL/AMPK/AMPKA2	VPLGFTFSFPTEQK*	9.162
lNAASPAAEASPnTTPsSFFLPVISGGGSPKR	0.0496755	3666.87	TcCLB.509805.210	hypothetical protein; conserved	TcChr40-S:1000573-1003593(+)	1006	2.53e-06	31165.6	23217.2	0.744963	0.0133089	-0.424759	TcCLB.509805.210	17	S	CAMK/CAMKL/PASK/PASK	ASPNTTPSSFFLPVI	7.492
sAAATLHQHDIGTLLSsKNITAPPR	0.266205	3136.68	TcCLB.509247.30	hypothetical protein; conserved	TcChr10-S:103625-110614(+)	2329	2.24e-05	47843.3	30378.9	0.634966	0.0254939	-0.655248	TcCLB.509247.30	17	S	CAMK/CAMKL/PASK/PASK	DIGTLLSSKNITAPP	7.492
sVFGVDFGNLNSTVAITR	0.126029	1975.93	TcCLB.507831.60	heat shock protein 110; putative	TcChr40-S:1044569-1047067(+)	832	1.08e-05	1442.1	8738.53	6.0596	0.0022034	2.59922	TcCLB.507831.60	1	S	CAMK/CAMKL/QIK/SIK1	*******SVFGVDFG	4.074
nSTVsEDPILVSLACWK	0.00441613	2524.27	TcCLB.506147.110	hypothetical protein; conserved	TcChr39-S:1165030-1168236(-)	1068	2.07e-07	147549	397691	2.69531	0.0246036	1.43045	TcCLB.506147.110	5	S	CAMK/CAMKL/QIK/SIK1	***NSTVSEDPILVS	4.074
nSTVsEDPILVSLACWK	0.000648577	2524.26	TcCLB.506147.110	hypothetical protein; conserved	TcChr39-S:1165030-1168236(-)	1068	2.98e-08	26699.2	48894.3	1.8313	0.0498595	0.87287	TcCLB.506147.110	5	S	CAMK/CAMKL/QIK/SIK1	***NSTVSEDPILVS	4.074
tELMGQLIsNCGCsTGSASRPSSAVSAVNR	3.65e-05	3621.58	TcCLB.510149.60	hypothetical protein; conserved	TcChr36-S:145298-145816(-)	172	1.93e-09	38459.2	60280.1	1.56738	0.00506397	0.648354	TcCLB.510149.60	9	S	CAMK/CAMKL/QIK/SIK1	ELMGQLISNCGCSTG	4.074
tsYTEEDLAKEPPPTTSGEYFGVSLQEFDR	6.36e-05	3930.85	TcCLB.509585.10	dynein heavy chain; putative	TcChr14-S:549849-560969(-)	3706	1.66e-09	89736.7	128385	1.43069	0.0355011	0.516709	TcCLB.509585.10	2	S	CAMK/CAMKL/QIK/SIK1	******TSYTEEDLA	4.074
tLMQLFAEFNIsDDEEEMAPVNHPTGK	2.13e-09	3600.68	TcCLB.507077.30	hypothetical protein; conserved	TcChr30-S:462044-463132(-)	362	5.84e-14	16046.8	22444.6	1.3987	0.0401362	0.484082	TcCLB.507077.30	1	T	CAMK/CAMKL/QIK/SIK1	*******TLMQLFAE	4.074
tAITVAGVSAsSLMSPLLAANTPVR	8.22e-06	2735.45	TcCLB.511685.60	hypothetical protein; conserved	TcChr24-S:356117-360655(+)	1512	4.79e-10	11600	15358.7	1.32402	0.0318688	0.404928	TcCLB.511685.60	1	T	CAMK/CAMKL/QIK/SIK1	*******TAITVAGV	4.074
stGDVNSAGDILDGFFSHPSLPYNPSVGEGGDSLTK	0.00432985	3987.83	TcCLB.508541.190	cell cycle sequence binding phosphoprotein (RBP33); putative	TcChr38-S:327288-329309(+)	673	1.43e-07	78967.2	102131	1.29334	0.0414521	0.3711	TcCLB.508541.190	1	S	CAMK/CAMKL/QIK/SIK1	*******STGDVNSA	4.074
sNLFVSGLHAsVTDNELYK	0.157299	2631.33	TcCLB.506399.40	hypothetical protein; conserved	TcChr26-S:289382-291187(-)	601	6.74e-06	54500.9	70074.9	1.28576	0.0242502	0.362618	TcCLB.506399.40	1	S	CAMK/CAMKL/QIK/SIK1	*******SNLFVSGL	4.074
tVsELNSALLAVASTqR	0.0885968	2069.06	TcCLB.510283.120	hypothetical protein; conserved	TcChr16-S:267900-269588(+)	562	7.83e-06	8020.25	10062.6	1.25465	0.0189147	0.327287	TcCLB.510283.120	3	S	CAMK/CAMKL/QIK/SIK1	*****TVSELNSALL	4.074
sRPEWVDNFLSPEGDHAVEDDGNSsNEmAKPPPK	0.00193538	4534.15	TcCLB.504125.60	MCAK-like kinesin; putative	TcChr26-S:607716-609365(-)	549	8.61e-08	37775.2	30199.9	0.799463	0.0356333	-0.322897	TcCLB.504125.60	1	S	CAMK/CAMKL/QIK/SIK1	*******SRPEWVDN	4.074
kRPAVLSsQEVQAVVnAR	0.0679975	2490.37	TcCLB.506543.100	hypothetical protein; conserved	TcChr40-S:1825570-1827987(-)	805	7.52e-06	121679	96794	0.795489	0.0332349	-0.330086	TcCLB.506543.100	8	S	CAMK/CAMKL/QIK/SIK1	KRPAVLSSQEVQAVV	4.074
sVLSSSQsSRPSATDSTLNVLTPLLDNYTIPITR	6.5e-08	3942.02	TcCLB.508569.130	6-phosphofructo-2-kinase/fructose-2;6-biphosphatase; putative	TcChr19-S:275057-277306(-)	749	2.37e-12	20429.6	16007.6	0.783549	0.0327361	-0.351904	TcCLB.508569.130	8	S	CAMK/CAMKL/QIK/SIK1	SVLSSSQSSRPSATD	4.074
tALPDGVVEQHPEYFSVLSPPPILSIASAGCNIsSEDVDRETYGNDSSANR	1.83e-11	5837.71	TcCLB.506825.150	hypothetical protein; conserved	TcChr27-S:642706-644904(+)	732	1.56e-15	19816.5	15443.4	0.779321	0.0231942	-0.359711	TcCLB.506825.150	1	T	CAMK/CAMKL/QIK/SIK1	*******TALPDGVV	4.074
tSLmSDsPATPPVSFSR	0.122824	2103.97	TcCLB.510241.90	hypothetical protein; conserved	TcChr8-S:243329-245323(-)	664	8.94e-06	26305.9	20433.2	0.776754	0.0223782	-0.364471	TcCLB.510241.90	1	T	CAMK/CAMKL/QIK/SIK1	*******TSLMSDSP	4.074
rGsAPEAQQYDFLSYR	0.16915	2196.02	TcCLB.509007.10	hypothetical protein; conserved	TcChr31-S:564275-566923(+)	882	1.06e-05	208786	157816	0.755876	0.0491925	-0.403778	TcCLB.509007.10	3	S	CAMK/CAMKL/QIK/SIK1	*****RGSAPEAQQY	4.074
rRsQVAVGIIAAQAEVIR	0.00203152	2245.26	TcCLB.509073.40	outer dynein arm docking complex protein (DC2)	TcChr35-S:370474-372429(+)	651	3.47e-07	83538	61806.7	0.739863	0.0300068	-0.43467	TcCLB.509073.40	3	S	CAMK/CAMKL/QIK/SIK1	*****RRSQVAVGII	4.074
nKsKDIVSVVLLHEPTGTR	0.00454099	2859.61	TcCLB.510525.50	hypothetical protein; conserved	TcChr13-S:252438-254516(+)	692	9.35e-07	106825	78812.2	0.737768	0.0422268	-0.43876	TcCLB.510525.50	3	S	CAMK/CAMKL/QIK/SIK1	*****NKSKDIVSVV	4.074
sLPAVAHVPPPsPK	4.5e-05	1934.07	TcCLB.504427.270	hypothetical protein; conserved	TcChr22-S:341572-344160(-)	862	8.89e-09	37934.8	27605.4	0.727706	0.0389	-0.458573	TcCLB.504427.270	1	S	CAMK/CAMKL/QIK/SIK1	*******SLPAVAHV	4.074
sNIVFGDVNLVNsPR	0.0232445	1938.98	TcCLB.510241.124	hypothetical protein; conserved	TcChr8-S:251125-252663(-)	512	1.54e-06	193209	127735	0.661123	0.0132639	-0.597009	TcCLB.510241.124	1	S	CAMK/CAMKL/QIK/SIK1	*******SNIVFGDV	4.074
rAAAAAAAAEsDDENNKDNNGEEEEK	1.23e-07	3485.61	TcCLB.506529.170	hypothetical protein; conserved	TcChr6-S:64990-66909(-)	639	4.67e-12	26650.4	17367	0.65166	0.0261727	-0.617808	TcCLB.506529.170	11	S	CAMK/CAMKL/QIK/SIK1	AAAAAAESDDENNKD	4.074
rRsQVAVGIIAAQAEVIRqEEAIK	0.10517	3173.76	TcCLB.509073.40	outer dynein arm docking complex protein (DC2)	TcChr35-S:370474-372429(+)	651	1.58e-05	24838.6	16081.7	0.647446	0.0287737	-0.627168	TcCLB.509073.40	3	S	CAMK/CAMKL/QIK/SIK1	*****RRSQVAVGII	4.074
rAAAAAAAAEsDDENNKDNNGEEEEKR	0.480479	3641.72	TcCLB.506529.170	hypothetical protein; conserved	TcChr6-S:64990-66909(-)	639	2e-05	23349.8	11930.1	0.510929	0.0249906	-0.968804	TcCLB.506529.170	11	S	CAMK/CAMKL/QIK/SIK1	AAAAAAESDDENNKD	4.074
iSTGGKDEPALVSLVLAGDFNsDAGSPPIR	0.276044	3520.82	TcCLB.504073.10	endonuclease/exonuclease/phosphatase; putative	TcChr30-S:285149-286783(+)	544	8.66e-06	35173.9	27417.3	0.779479	0.000646042	-0.359418	TcCLB.504073.10	22	S	CAMK/CAMKL/QIK/SIK2	VLAGDFNSDAGSPPI	7.514
lADVHSsKDAYECNPGEDSDADRMER	0.167859	3572.55	TcCLB.503881.10	kynureninase; putative	TcChr33-S:735610-737007(+)	465	1.52e-05	99671.1	74240	0.74485	0.0165811	-0.424979	TcCLB.503881.10	7	S	CAMK/CAMKL/QIK/SIK2	*LADVHSSKDAYECN	7.514
nANMHEGNsDAGDGIQR	0.00553886	2093.87	TcCLB.506795.40	phosphatidylserine synthase; putative	TcChr11-S:416607-418142(+)	511	6.22e-07	22150.7	16396.6	0.740228	0.0485544	-0.433958	TcCLB.506795.40	9	S	CAMK/CAMKL/QIK/SIK2	ANMHEGNSDAGDGIQ	7.514
nSCAANIFGGPPLEqKPPRPFRPsQLLTYEEAPNLSK	1.34e-05	4959.57	TcCLB.508719.70	flagellum targeting protein kharon1; putative (KH1)	TcChr37-S:375185-376402(+)	405	8.79e-10	82150	102054	1.24229	0.0176602	0.312999	TcCLB.508719.70	24	S	CAMK/DAPK/DAPK/DAPK1	PPRPFRPSQLLTYEE	4.846
kLANDPNLTLVEAPLLDPNVQPLsAEQLQALQEEAR	2.26e-10	4475.37	TcCLB.509455.80	GTP-binding nuclear protein rtb2; putative	TcChr15-S:379234-379887(-)	217	1.98e-14	12353.7	8665.51	0.701451	0.012329	-0.511586	TcCLB.509455.80	24	S	CAMK/MAPKAPK/MK5/MAPKAPK5	DPNVQPLSAEQLQAL	9.696
sFRGDEsLGqALPFDAIATYTADYPPK	0.00135216	3468.69	TcCLB.511065.10	STOP axonemal protein; putative	TcChr26-S:148493-149293(+)	266	4.17e-08	12150	8294.22	0.682654	0.0385322	-0.550774	TcCLB.511065.10	1	S	CAMK/MAPKAPK/MK5/MAPKAPK5	*******SFRGDESL	9.696
tLQDANVVGTPAAsTESLTPLLDELELHAFNSNTSPR	9.63e-10	4217.09	TcCLB.508215.10	hypothetical protein; conserved	TcChr29-S:640755-641876(+)	373	2.26e-14	10936.6	14693.3	1.3435	0.00848267	0.425996	TcCLB.508215.10	14	S	CAMK/MAPKAPK/MNK/MNK1	VVGTPAASTESLTPL	10.35
nAVPCSLPSIKPLPQSGVLSPPIAVITPVHAGSPSNsTSNFMGDDVR	1.46e-06	5416.76	TcCLB.507083.109	hypothetical protein; conserved (fragment)	TcChr25-S:344674-359217(+)	4848	7.78e-11	26562.3	36801	1.38546	0.00883011	0.470361	TcCLB.507083.109	37	S	CAMK/MAPKAPK/MNK/MNK2	HAGSPSNSTSNFMGD	9.344
lRLESNsDTDQPAATR	0.132143	2082	TcCLB.507611.10	retrotransposon hot spot (RHS) protein; putative	TcChr37-S:1391-4231(-)	946	9.95e-06	101032	71726.4	0.709939	0.0293464	-0.494234	TcCLB.507611.10	7	S	CAMK/MAPKAPK/MNK/MNK2	*LRLESNSDTDQPAA	9.344
lPNRVPHVADNSNsnVVDIQYDDGKGSLTEVK	3.16e-06	4248.17	TcCLB.507089.110	hypothetical protein; conserved	TcChr35-S:201680-203803(-)	707	1.39e-10	50751.8	35636	0.702162	0.0308779	-0.510125	TcCLB.507089.110	14	S	CAMK/MAPKAPK/MNK/MNK2	HVADNSNSNVVDIQY	9.344
tQHGHGHGQNNTsSPRGPR	0.202155	2333.07	TcCLB.510089.200	hypothetical protein; conserved	TcChr40-S:1774627-1775664(-)	345	1.8e-05	17561.6	8708.98	0.495912	0.0230596	-1.01185	TcCLB.510089.200	13	S	CAMK/MAPKAPK/MNK/MNK2	GHGQNNTSSPRGPR*	9.344
lGILPVSRPVSPYPSPQAsQTTLSAR	0.00192213	3030.61	TcCLB.508357.30	hypothetical protein; conserved	TcChr39-S:488102-489463(+)	453	1.17e-07	44196.1	28155.5	0.63706	0.0166935	-0.6505	TcCLB.508357.30	19	S	CK1/CK1/CK1-D/CK1e	PYPSPQASQTTLSAR	6.526
eLEENSGEVAGsFLNDTREETSDVVsLGHPEMDGLR	5.72e-07	4306.88	TcCLB.510055.50	hypothetical protein; conserved	TcChr17-S:517771-520698(+)	975	6.24e-11	23145.1	38856.9	1.67883	0.0129567	0.747459	TcCLB.510055.50	26	S	CK1/CK1/CK1-D/CSNK1D	EETSDVVSLGHPEMD	11.703
wVSLLQQNGQDAPPNEEMPEDDDADsKNEEGLRDDDGEVDEAAVRR	0.000573578	5691.55	TcCLB.503953.10	hypothetical protein; conserved	TcChr21-S:507066-508667(-)	533	9.47e-08	31369.9	24969.7	0.795976	0.0195352	-0.329204	TcCLB.503953.10	26	S	CK1/CK1/CK1-D/CSNK1D	PEDDDADSKNEEGLR	11.703
sAESLPsDESEAHQQPQPQKK	0.15444	2900.39	TcCLB.509267.110	heat shock protein Hsp20; putative	TcChr35-S:625238-625864(+)	208	6.27e-06	47482	29233.1	0.615666	0.0455483	-0.699781	TcCLB.509267.110	7	S	CK1/CK1/CK1-D/CSNK1D	*SAESLPSDESEAHQ	11.703
mTTDAAALLAsNNFVDPAFHLDGNVIDFEAR	1.2e-09	3643.71	TcCLB.510611.40	hypothetical protein; conserved	TcChr28-S:87490-91092(+)	1200	3.09e-14	11822.5	25311.4	2.14095	0.000300801	1.09825	TcCLB.510611.40	11	S	CK1/VRK/VRK2	DAAALLASNNFVDPA	5.225
gKNDtGGGEMAADDLLPFLPPLLHR	3.51e-07	3171.61	TcCLB.503697.100	hypothetical protein; conserved	TcChr36-S:1013133-1018463(-)	1776	1.48e-11	7131.48	9171.27	1.28603	0.0109512	0.362921	TcCLB.503697.100	5	T	CK1/VRK/VRK2	***GKNDTGGGEMAA	5.225
gIIAPTSCGWsDILGGGsAASRASVTAGGEHVIK	0.101836	3967.92	TcCLB.510535.20	hypothetical protein; conserved	TcChr13-S:453100-461118(+)	2672	3.22e-06	15390.7	18571	1.20664	0.0426175	0.270996	TcCLB.510535.20	11	S	CK1/VRK/VRK2	APTSCGWSDILGGGS	5.225
dqGSVVsVQDSqIDILSALR	0.000457076	2440.18	TcCLB.511585.50	hypothetical protein; conserved	TcChr33-S:105064-106395(-)	443	1.99e-08	5441.87	6556.12	1.20476	0.0444875	0.268741	TcCLB.511585.50	7	S	CK1/VRK/VRK2	*DQGSVVSVQDSQID	5.225
hCTAEDAAAKVsGIQnGEANK	0.120414	3006.47	TcCLB.508265.100	hypothetical protein; conserved	TcChr11-S:473721-477221(+)	1166	4.34e-06	91573.1	72053.4	0.78684	0.0368101	-0.345858	TcCLB.508265.100	12	S	CK1/VRK/VRK2	EDAAAKVSGIQNGEA	5.225
hCTAEDAAAKVsGIQNGEANKVnGNGTR	3.98e-06	3704.81	TcCLB.508265.100	hypothetical protein; conserved	TcChr11-S:473721-477221(+)	1166	1.62e-10	100807	77674.9	0.770531	0.0245483	-0.376075	TcCLB.508265.100	12	S	CK1/VRK/VRK2	EDAAAKVSGIQNGEA	5.225
hTPELHDLsKEGsDVPLTGTSGNGGSAPAR	0.0117642	3604.7	TcCLB.511871.90	hypothetical protein; conserved	TcChr15-S:90161-91909(+)	582	3.75e-07	36763.6	28050.9	0.763006	0.0467343	-0.390233	TcCLB.511871.90	9	S	CK1/VRK/VRK2	TPELHDLSKEGSDVP	5.225
fRLNSPTAFVNtEGTNLFHSAGGVMNSIR	1.37e-06	3445.68	TcCLB.508465.100	hypothetical protein	TcChr39-S:1532315-1533706(+)	463	3.37e-11	23001.4	17522.8	0.761816	0.0151859	-0.392486	TcCLB.508465.100	12	T	CK1/VRK/VRK2	SPTAFVNTEGTNLFH	5.225
hINDSANsNAGGDGDFPAR	9.53e-07	2222.95	TcCLB.509143.10	hypothetical protein; conserved	TcChr24-S:424755-429176(+)	1473	8.03e-11	57922.4	43901.8	0.757941	0.00591563	-0.399842	TcCLB.509143.10	8	S	CK1/VRK/VRK2	HINDSANSNAGGDGD	5.225
gAFILTAsHNPGGPEEDFGIK	0.00236349	2694.34	TcCLB.511911.130	phosphoglucomutase	TcChr10-S:59311-61113(-)	600	9.03e-08	120058	89260.7	0.743482	0.0120823	-0.427631	TcCLB.511911.130	8	S	CK1/VRK/VRK2	GAFILTASHNPGGPE	5.225
gGYTmEEDLNAtSLNDMGDSVPKPR	4.83e-08	3250.49	TcCLB.510755.120	RNA-binding protein; putative	TcChr39-S:1659255-1660085(-)	276	1.55e-12	31986.2	23761	0.742852	0.0316899	-0.428853	TcCLB.510755.120	12	T	CK1/VRK/VRK2	MEEDLNATSLNDMGD	5.225
fPTGVLGsGSGGITGAAAAAGGGRK	0.00016317	2654.39	TcCLB.504427.270	hypothetical protein; conserved	TcChr22-S:341572-344160(-)	862	8.66e-09	161515	119541	0.740121	0.0243434	-0.434166	TcCLB.504427.270	8	S	CK1/VRK/VRK2	FPTGVLGSGSGGITG	5.225
aLYGRSPLsSVCGSVNSWSASSR	0.302297	2804.31	TcCLB.511557.40	hypothetical protein; conserved	TcChr41-S:508125-510422(-)	765	9.69e-06	134963	99138.1	0.734558	0.0404146	-0.445052	TcCLB.511557.40	9	S	CK1/VRK/VRK2	LYGRSPLSSVCGSVN	5.225
rIEYLTEVYSTLSStCQSPGGPSDDEVTLGDVSR	5.49e-10	4094.89	TcCLB.508569.130	6-phosphofructo-2-kinase/fructose-2;6-biphosphatase; putative	TcChr19-S:275057-277306(-)	749	2.51e-14	29082.8	21256.3	0.73089	0.0067177	-0.452274	TcCLB.508569.130	15	T	CK1/VRK/VRK2	VYSTLSSTCQSPGGP	5.225
kNSKDADGtCVPSDFNNTLDAWIER	7.58e-05	3687.79	TcCLB.511001.130	hypothetical protein; conserved	TcChr38-S:160862-167188(+)	2108	1.8e-09	85798.7	62569.9	0.729264	0.0416936	-0.455488	TcCLB.511001.130	9	T	CK1/VRK/VRK2	NSKDADGTCVPSDFN	5.225
gASPPnGPAsASVPSQPHSTPHSDWSQGDTGFEPR	0.332341	3851.7	TcCLB.508265.100	hypothetical protein; conserved	TcChr11-S:473721-477221(+)	1166	2.16e-05	30347	21787.2	0.717936	0.0327691	-0.478072	TcCLB.508265.100	10	S	CK1/VRK/VRK2	SPPNGPASASVPSQP	5.225
aDQLsnEQISEFKEAFSLFDKDGDGTITTK	0.000491561	4144.05	TcCLB.507483.39	calmodulin (CALA2)	TcChr41-S:549733-550182(-)	149	1.14e-08	97360.9	68844.7	0.707108	0.0249001	-0.499998	TcCLB.507483.39	5	S	CK1/VRK/VRK2	***ADQLSNEQISEF	5.225
sEPAGCSVGCmItASHNPATDNGLK	0.00510671	3263.47	TcCLB.508569.80	phosphoacetylglucosamine mutase; putative;acetylglucosaminephosphomutase; putative;N-acetylglucosamine-phosphate mutase; putative	TcChr19-S:265503-267335(-)	610	2.5e-07	118653	83242.2	0.701558	0.0337645	-0.511366	TcCLB.508569.80	13	T	CK1/VRK/VRK2	CSVGCMITASHNPAT	5.225
aTsDTEEKFDQCLAPVDFATK	0.000144711	3207.57	TcCLB.506531.50	metacaspase; putative;cysteine peptidase; Clan CD; family C13; putative	TcChr6-S:270849-271925(-)	358	4.99e-09	35155.7	24570	0.698892	0.0219355	-0.516858	TcCLB.506531.50	3	S	CK1/VRK/VRK2	*****ATSDTEEKFD	5.225
lADVHsSKDAYECnPGEDSDADRmER	6.05e-05	3589.55	TcCLB.503881.10	kynureninase; putative	TcChr33-S:735610-737007(+)	465	5.57e-09	90388.5	63143.5	0.698579	0.0115622	-0.517505	TcCLB.503881.10	6	S	CK1/VRK/VRK2	**LADVHSSKDAYEC	5.225
kLPVVLTSMPNATLtASNGFPATGFIPR	1.15e-07	3437.85	TcCLB.509233.120	hypothetical protein; conserved	TcChr15-S:279269-290290(-)	3673	8.56e-12	20904.2	14301.6	0.684149	0.0282759	-0.547617	TcCLB.509233.120	15	T	CK1/VRK/VRK2	SMPNATLTASNGFPA	5.225
dYSVtDIHLNAEEGRR	0.0294946	2183.01	TcCLB.508209.130	hypothetical protein; conserved	TcChr29-S:738568-742536(+)	1322	1.94e-06	42395.8	28626	0.675209	0.049121	-0.566593	TcCLB.508209.130	5	T	CK1/VRK/VRK2	***DYSVTDIHLNAE	5.225
hQHSPsAPFSQNFTPIQNSNSNNAAVAANTAVSSR	1.02e-05	3959.85	TcCLB.506181.70	hypothetical protein; conserved	TcChr14-S:73828-78132(-)	1434	4.07e-10	48034.2	32180.3	0.669945	0.048088	-0.577886	TcCLB.506181.70	6	S	CK1/VRK/VRK2	**HQHSPSAPFSQNF	5.225
aTNIHsSGGLAEVVDSFEDAAnRPEVIDR	0.00703501	3378.6	TcCLB.511751.60	hypothetical protein; conserved	TcChr32-S:495248-496627(+)	459	1.76e-07	69743	44708.1	0.641041	0.0223791	-0.641512	TcCLB.511751.60	6	S	CK1/VRK/VRK2	**ATNIHSSGGLAEV	5.225
hIAFAHSsSSPPIFQER	0.0198053	2219.07	TcCLB.506735.40	hypothetical protein	TcChr14-S:278822-280840(-)	672	1.17e-06	37186.7	23086.1	0.620815	0.0264262	-0.687764	TcCLB.506735.40	8	S	CK1/VRK/VRK2	HIAFAHSSSSPPIFQ	5.225
aKEEVVSQLStSPGGSQHLSSK	3.47e-08	3022.59	TcCLB.506513.180	hypothetical protein; conserved	TcChr17-S:569846-571582(+)	578	2e-12	48065	27696	0.576219	0.0091063	-0.79531	TcCLB.506513.180	11	T	CK1/VRK/VRK2	EVVSQLSTSPGGSQH	5.225
aKEEVVSqLStSPGGSQHLSSK	1.54e-06	3023.58	TcCLB.506513.180	hypothetical protein; conserved	TcChr17-S:569846-571582(+)	578	8.53e-11	54192	30223.5	0.557711	0.0231644	-0.842411	TcCLB.506513.180	11	T	CK1/VRK/VRK2	EVVSQLSTSPGGSQH	5.225
fTLDANACPFtPTTMVTGR	0.147143	2476.14	TcCLB.510101.340	hypothetical protein; conserved	TcChr27-S:161013-164957(-)	1314	7.3e-06	9573.53	12226.3	1.2771	0.000174916	0.352867	TcCLB.510101.340	11	T	CMGC/CDK/CDK2/CDK2	DANACPFTPTTMVTG	12.788
aLYGRsPLSSVCGSVNSWSASSR	0.00524929	2804.31	TcCLB.511557.40	hypothetical protein; conserved	TcChr41-S:508125-510422(-)	765	1.68e-07	53562.5	38703	0.722576	0.0348027	-0.468778	TcCLB.511557.40	6	S	CMGC/CDK/CDK2/CDK2	**ALYGRSPLSSVCG	12.788
kFEDFLASFQPSIAERsNGTNVDSR	0.0512228	3352.64	TcCLB.510323.20	hypothetical protein; conserved	TcChr36-S:642107-645259(+)	1050	1.75e-06	62953	44391.5	0.705153	0.040438	-0.503993	TcCLB.510323.20	17	S	CMGC/CDK/CDK4/CDK6	QPSIAERSNGTNVDS	6.758
eQVqTLQALLQGsPQR	0.101111	2105.07	TcCLB.506677.30	hypothetical protein; conserved	TcChr20-S:121373-122128(+)	251	7.77e-06	12395.4	40717.5	3.28488	0.0131992	1.71584	TcCLB.506677.30	13	S	CMGC/CDK/CDK5/CDK5	LQALLQGSPQR****	15.952
eQLEVKDEEQPVMPLPEEGDsPGESVEPPLR	5.95e-10	3996.93	TcCLB.506795.20	hypothetical protein; conserved	TcChr11-S:420464-422950(+)	828	1.82e-14	48053.5	59841.2	1.2453	0.030971	0.316499	TcCLB.506795.20	21	S	CMGC/CDK/CDK5/CDK5	PLPEEGDSPGESVEP	15.952
iLHPGNHTIRVtPTGGTAYNGTVGESWTAPR	0.000866651	3568.77	TcCLB.506163.30	hypothetical protein; conserved	TcChr30-S:145770-146531(-)	253	2.71e-08	126778	81850.4	0.64562	0.0321166	-0.631244	TcCLB.506163.30	12	T	CMGC/CDK/CDK5/CDK5	GNHTIRVTPTGGTAY	15.952
iLGKPDDDKNNsKGGSK	0.411281	2997.68	TcCLB.503841.10	proteasome activator protein pa26; putative	TcChr38-S:200666-201349(+)	227	6.76e-05	43287.4	30761.8	0.710641	0.0310601	-0.492807	TcCLB.503841.10	12	S	CMGC/CDK/CDK9/CDK9	PDDDKNNSKGGSK**	7.718
lIVNFVDGRPNELLGTsNHGSSSTR	0.000285835	2978.47	TcCLB.511001.130	hypothetical protein; conserved	TcChr38-S:160862-167188(+)	2108	1.21e-08	46991.5	32466.9	0.69091	0.0263825	-0.53343	TcCLB.511001.130	17	S	CMGC/CDK/CDK9/CDK9	PNELLGTSNHGSSST	7.718
gGHPLHQENQmsEEDEDVEALPHSVSQR	4.55e-10	3479.52	TcCLB.484949.9	serine/threonine protein kinase; putative	TcChr36-S:792017-793984(+)	656	3.11e-14	16015.4	10079.1	0.629336	0.0197001	-0.668099	TcCLB.484949.9	12	S	CMGC/CK2	LHQENQMSEEDEDVE	9.894
tAITVAGVSAsSLMSPLLAANTPVR	8.22e-06	2735.45	TcCLB.511685.60	hypothetical protein; conserved	TcChr24-S:356117-360655(+)	1512	4.79e-10	11600	15358.7	1.32402	0.0318688	0.404928	TcCLB.511685.60	11	S	CMGC/DYRK/DYRK1/DYRK1B	TVAGVSASSLMSPLL	7.575
qAGVGNPPPLSPLQALCSPtATGLSPVLLGEKGDHHLPVSK	6.84e-06	4728.45	TcCLB.509231.20	protein kinase; putative	TcChr15-S:21228-22991(-)	587	3.48e-10	16710.9	12713.6	0.760798	0.0409801	-0.394414	TcCLB.509231.20	20	T	CMGC/DYRK/DYRK1/DYRK1B	LQALCSPTATGLSPV	7.575
nTECWDNVVAEsPLHLTDRR	0.0447195	2788.28	TcCLB.507639.60	hypothetical protein; conserved	TcChr37-S:1122312-1124561(-)	749	1.58e-06	18505.8	26115.5	1.4112	0.0115197	0.496926	TcCLB.507639.60	12	S	CMGC/DYRK/DYRK2/DYRK3	WDNVVAESPLHLTDR	7.517
lFSIVHAPEEPsTPVK	0.00872257	2288.22	TcCLB.507677.150	CYC2-like cyclin; putative;G1 cyclin CycE4; putative	TcChr37-S:928733-931858(+)	1041	7.48e-07	51604.1	156530	3.03329	0.0233921	1.60088	TcCLB.507677.150	12	S	CMGC/DYRK/HIPK/HIPK2	VHAPEEPSTPVK***	1.841
dGVISSAGEIMsPENLPLPLNVTINHVYFQR	3.08e-12	3718.86	TcCLB.504427.50	hypothetical protein; conserved	TcChr22-S:285717-286652(+)	311	9.98e-17	10776.1	13761	1.27699	0.0345272	0.352748	TcCLB.504427.50	12	S	CMGC/MAPK/ERK/Erk1	SSAGEIMSPENLPLP	17.725
lFALLERPIEGTDESDVYYYPGtPADEmQR	2.55e-06	3799.74	TcCLB.511363.4	hypothetical protein; conserved	TcChr40-S:176639-177388(-)	250	1.1e-10	9177.47	11596.8	1.26361	0.00330777	0.337555	TcCLB.511363.4	23	T	CMGC/MAPK/ERK/Erk1	DVYYYPGTPADEMQR	17.725
dHEAEGKDGFAEELsPLQALIR	0.0001057	2962.48	TcCLB.504153.240	hypothetical protein; conserved	TcChr39-S:712304-713992(-)	562	4.49e-09	14544.6	10526.4	0.723734	0.0223792	-0.466469	TcCLB.504153.240	15	S	CMGC/MAPK/ERK/Erk1	DGFAEELSPLQALIR	17.725
fITTLsPHAAR	0.170319	1521.79	TcCLB.511871.90	hypothetical protein; conserved	TcChr15-S:90161-91909(+)	582	3.72e-05	5471.71	3925.55	0.717426	0.0384699	-0.479098	TcCLB.511871.90	6	S	CMGC/MAPK/ERK/Erk1	**FITTLSPHAAR**	17.725
dATQVLLNLIEAPNRFPStPqTSEGSK	0.000748966	3451.76	TcCLB.511535.30	hypothetical protein; conserved	TcChr35-S:273446-276094(-)	882	2.78e-08	23268.2	15261.9	0.655913	0.0458147	-0.608425	TcCLB.511535.30	19	T	CMGC/MAPK/ERK/Erk1	APNRFPSTPQTSEGS	17.725
eAQLHIPPVIGRtPTAQAR	0.0448741	2363.26	TcCLB.506211.20	hypothetical protein; conserved	TcChr40-S:401425-402687(-)	420	5.44e-06	49878.4	35966.9	0.721092	0.0486363	-0.471745	TcCLB.506211.20	13	T	CMGC/MAPK/ERK/Erk2	IPPVIGRTPTAQAR*	10.451
vCQQLNTTNAALTTNAQTLLGQLNVEHYGIEGAPsEK	0.00166066	4589.28	TcCLB.504153.280	hypothetical protein; conserved	TcChr39-S:723569-724801(-)	410	7.12e-08	33477.2	24253.8	0.724487	0.0357452	-0.464968	TcCLB.504153.280	35	S	CMGC/MAPK/ERK/Erk3	YGIEGAPSEK*****	2.088
nHEQSLsTNVVTFGIVEK	4.13e-05	2539.3	TcCLB.510773.40	hypothetical protein	TcChr31-S:647170-649008(+)	612	2.19e-09	58183.4	41130	0.706903	0.04232	-0.500415	TcCLB.510773.40	7	S	CMGC/MAPK/ERK/Erk3	*NHEQSLSTNVVTFG	2.088
vPYQFYQMHPQVPPLAPVPPQAGAYQTsPNPDLYQIAAQK	0.000412732	4987.52	TcCLB.506945.260	hypothetical protein; conserved	TcChr32-S:932501-933628(+)	375	2.17e-08	18640.5	24622.4	1.32091	0.0230834	0.401534	TcCLB.506945.260	28	S	CMGC/MAPK/ERK/FUS3	QAGAYQTSPNPDLYQ	10.133
lNAASPAAEASPNTTPSSFFLPVISGGGsPK	3.13e-05	3509.79	TcCLB.509805.210	hypothetical protein; conserved	TcChr40-S:1000573-1003593(+)	1006	8.75e-10	77680.9	61854.2	0.79626	0.0455935	-0.328688	TcCLB.509805.210	29	S	CMGC/MAPK/ERK/FUS3	PVISGGGSPKR****	10.133
lNAASPAAEASPNTTPSSFFLPVISGGGsPKR	8.75e-06	3665.88	TcCLB.509805.210	hypothetical protein; conserved	TcChr40-S:1000573-1003593(+)	1006	3.33e-10	72923.6	49795.8	0.682849	0.0203375	-0.550362	TcCLB.509805.210	29	S	CMGC/MAPK/ERK/FUS3	PVISGGGSPKR****	10.133
lTLWLRPsPIEDDEDEAVSSGVGSAGR	0.000796583	3164.52	TcCLB.511189.10	hypothetical protein; conserved (pseudogene)	TcChr23-S:21674-22750(-)	359	2.94e-08	22125.5	16957.9	0.766439	0.0496456	-0.383756	TcCLB.511189.10	8	S	CMGC/MAPK/JNK/JNK1	LTLWLRPSPIEDDED	3.02
fLHVVTDAAGsPVNsIVGEVSPNSTSR	2.57e-06	3128.47	TcCLB.510297.10	hypothetical protein; conserved	TcChr20-S:148692-149315(+)	207	7.58e-11	16301	47822.6	2.93372	0.00602704	1.55273	TcCLB.510297.10	11	S	CMGC/MAPK/JNK/JNK2	VVTDAAGSPVNSIVG	31.509
aVsPLsSQEVQAVVNAR	0.0110389	2143.02	TcCLB.506543.100	hypothetical protein; conserved	TcChr40-S:1825570-1827987(-)	805	6.95e-07	2848.93	5708.44	2.00372	0.0227716	1.00268	TcCLB.506543.100	3	S	CMGC/MAPK/JNK/JNK2	*****AVSPLSSQEV	31.509
aDGtPVPIGFTIMQTLEQHVR	0.00110756	2618.3	TcCLB.510215.10	NADH-dependent fumarate reductase; putative	TcChr38-S:372567-375995(+)	1142	4.4e-08	12906.7	19549.7	1.51469	0.0411966	0.599026	TcCLB.510215.10	4	T	CMGC/MAPK/JNK/JNK2	****ADGTPVPIGFT	31.509
fASSSIsPPILNK	0.421533	1898.03	TcCLB.510773.100	hypothetical protein; conserved	TcChr31-S:634115-639040(+)	1641	6.98e-05	49215.6	67590.1	1.37335	0.0129433	0.457696	TcCLB.510773.100	7	S	CMGC/MAPK/JNK/JNK2	*FASSSISPPILNK*	31.509
fLHVVTDAAGsPVNsIVGEVSPNSTSRGDSPSSDITVNPR	0.000662782	4454.09	TcCLB.510297.10	hypothetical protein; conserved	TcChr20-S:148692-149315(+)	207	2.49e-08	62776.6	83240	1.32597	0.012261	0.407051	TcCLB.510297.10	11	S	CMGC/MAPK/JNK/JNK2	VVTDAAGSPVNSIVG	31.509
fLHTSPAGSTKPPKsPDGINSSGILK	0.00365103	3632.02	TcCLB.505229.5	hypothetical protein; conserved (fragment)	TcChr3-S:92491-92979(+)	163	5.15e-07	51129.7	65046.1	1.27218	0.0423379	0.347301	TcCLB.505229.5	15	S	CMGC/MAPK/JNK/JNK2	GSTKPPKSPDGINSS	31.509
aSARsPVLPHLDFRPQSAEGR	0.171698	2412.17	TcCLB.510749.50	hypothetical protein; conserved	TcChr39-S:1605489-1610165(-)	1558	1.02e-05	11045.3	13317.9	1.20575	0.0326999	0.269934	TcCLB.510749.50	5	S	CMGC/MAPK/JNK/JNK2	***ASARSPVLPHLD	31.509
qNLEsPVDCVFVVHR	0.0105827	1928.85	TcCLB.508265.100	hypothetical protein; conserved	TcChr11-S:473721-477221(+)	1166	6.7e-07	32966.7	26315.9	0.798256	0.0115083	-0.325078	TcCLB.508265.100	5	S	CMGC/MAPK/JNK/JNK2	***QNLESPVDCVFV	31.509
dLsPVSVVTEDAVK	0.251569	1996.05	TcCLB.508209.30	hypothetical protein; conserved	TcChr29-S:755817-757532(+)	571	1.91e-05	158184	121686	0.769269	0.044389	-0.37844	TcCLB.508209.30	3	S	CMGC/MAPK/JNK/JNK2	*****DLSPVSVVTE	31.509
vSPGDVDDGAPPtPTGRPEGADDNGPSK	2.98e-06	3242.5	TcCLB.506885.200	hypothetical protein; conserved	TcChr39-S:959586-962696(-)	1036	1.19e-10	122445	90178.1	0.736476	0.0473406	-0.44129	TcCLB.506885.200	13	T	CMGC/MAPK/JNK/JNK2	VDDGAPPTPTGRPEG	31.509
nINENEGQmEDIPsPPGGGGGNTK	2.63e-06	2965.34	TcCLB.510149.70	hypothetical protein; conserved	TcChr36-S:146580-148406(-)	608	1e-10	52418.2	37580.1	0.716929	0.0228412	-0.480098	TcCLB.510149.70	14	S	CMGC/MAPK/JNK/JNK2	GQMEDIPSPPGGGGG	31.509
hLGQVMEAYVSGEHSISSSNGsPLNLSK	6.78e-10	3465.7	TcCLB.504153.30	hypothetical protein; conserved	TcChr39-S:654119-654928(+)	269	1.61e-14	15298.3	10596.1	0.692633	0.025302	-0.529837	TcCLB.504153.30	22	S	CMGC/MAPK/JNK/JNK2	SISSSNGSPLNLSK*	31.509
emGGtPVEEAVFPETFLDVGQVEEIQQR	1.14e-06	3458.61	TcCLB.509167.180	kinesin; putative	TcChr32-S:817855-821208(-)	1117	3.1e-11	42846.4	27126.7	0.633115	0.0293372	-0.65946	TcCLB.509167.180	5	T	CMGC/MAPK/JNK/JNK2	***EMGGTPVEEAVF	31.509
tTVASAATAVASVTsPPLLSSAVSSK	0.000303819	2940.58	TcCLB.509099.150	protein kinase; putative	TcChr23-S:390134-392554(-)	806	1.88e-08	28606.1	22428.2	0.784037	0.0104752	-0.351007	TcCLB.509099.150	15	S	CMGC/MAPK/JNK/JNK3	TAVASVTSPPLLSSA	11.042
vLESRPPSLSEPPGQQPATETRPVSLGsPAHAR	0.0697336	3756.91	TcCLB.510741.40	hypothetical protein; conserved	TcChr39-S:1419736-1421481(+)	581	3.06e-06	33655.3	21695	0.644625	0.0203358	-0.633468	TcCLB.510741.40	28	S	CMGC/MAPK/JNK/JNK3	TRPVSLGSPAHAR**	11.042
rSDNDGDKPSGVsPVEPEsPLEEGSDLTNFTTLYVCPGCGAR	0.00863364	5263.35	TcCLB.480653.10	hypothetical protein; conserved	TcChr23-S:239516-240436(-)	306	9.31e-07	9143.13	14204.2	1.55354	0.0109796	0.635559	TcCLB.480653.10	13	S	CMGC/MAPK/p38/HOG1	GDKPSGVSPVEPESP	10.45
vLsPLSSPHPPASSLAAAAWALSPR	0.00568039	2791.46	TcCLB.503853.10	hypothetical protein; conserved	TcChr13-S:274154-276640(+)	828	2.72e-07	46054.2	56692	1.23099	0.000362017	0.299815	TcCLB.503853.10	3	S	CMGC/MAPK/p38/HOG1	*****VLSPLSSPHP	10.45
mCsPPFFSPVPMSQTPGPR	0.194036	2496.12	TcCLB.507927.40	hypothetical protein; conserved	TcChr32-S:288566-291847(+)	1093	9.99e-06	18235.8	22408.8	1.22884	0.0213948	0.297297	TcCLB.507927.40	3	S	CMGC/MAPK/p38/HOG1	*****MCSPPFFSPV	10.45
smEHsLNEYTFHPR	0.119774	2071.9	TcCLB.510323.20	hypothetical protein; conserved	TcChr36-S:642107-645259(+)	1050	1.22e-05	29897.6	21420	0.716445	0.0207694	-0.481071	TcCLB.510323.20	1	S	CMGC/MAPK/p38/HOG1	*******SMEHSLNE	10.45
aENTmFPsPPAQFDENVPHFYTVPQELIR	0.000763163	3698.73	TcCLB.507927.40	hypothetical protein; conserved	TcChr32-S:288566-291847(+)	1093	2.13e-08	32731	22982.1	0.702151	0.0489691	-0.510146	TcCLB.507927.40	8	S	CMGC/MAPK/p38/HOG1	MCSPPFFSPVPMSQT	10.45
rLAGGAHGAIsPVSAWVDGR	0.0087501	2285.16	TcCLB.507641.200	hypothetical protein; conserved	TcChr37-S:1186511-1187695(-)	394	5.27e-07	27329.3	18759.2	0.686411	0.0260459	-0.542855	TcCLB.507641.200	11	S	CMGC/MAPK/p38/HOG1	GGAHGAISPVSAWVD	10.45
sGRPEEGHYGNEESQsPTVPR	8.34e-06	2434.01	TcCLB.507611.10	retrotransposon hot spot (RHS) protein; putative	TcChr37-S:1391-4231(-)	946	7.09e-10	17689.7	14107.5	0.797496	0.0296553	-0.326451	TcCLB.507611.10	16	S	CMGC/MAPK/p38/MAPK11	YGNEESQSPTVPR**	8.192
kQDGHQDsPLEK	0.0105076	2148.12	TcCLB.507011.100	hypothetical protein; conserved	TcChr39-S:1356100-1358361(+)	753	1.16e-06	45665.3	33757	0.739227	0.0374245	-0.435911	TcCLB.507011.100	8	S	CMGC/MAPK/p38/MAPK11	KQDGHQDSPLEK***	8.192
kVSSVHLVEsPFVEELK	0.0225637	2693.5	TcCLB.506513.180	hypothetical protein; conserved	TcChr17-S:569846-571582(+)	578	3.43e-06	35235.4	25148	0.713716	0.00460806	-0.486579	TcCLB.506513.180	10	S	CMGC/MAPK/p38/MAPK11	SSVHLVESPFVEELK	8.192
sESDAKVESDVVPPsPK	1.11e-07	2537.32	TcCLB.509157.90	hypothetical protein; conserved	TcChr35-S:729971-732295(+)	774	6.43e-12	126737	88498.1	0.698281	0.0174045	-0.51812	TcCLB.509157.90	15	S	CMGC/MAPK/p38/MAPK11	ESDVVPPSPK*****	8.192
kLEAGQLFNSKsPDIEPR	2.03e-05	2795.52	TcCLB.508719.70	flagellum targeting protein kharon1; putative (KH1)	TcChr37-S:375185-376402(+)	405	1.54e-09	84506.8	58411	0.691198	0.0195476	-0.532829	TcCLB.508719.70	12	S	CMGC/MAPK/p38/MAPK11	GQLFNSKSPDIEPR*	8.192
hVDLLDDLFGGPPPPQsPTAQPSEQAALK	1.07e-05	3562.81	TcCLB.504427.140	hypothetical protein; conserved	TcChr22-S:304841-307639(+)	932	2.93e-10	16190.1	25721.1	1.5887	0.00674897	0.667843	TcCLB.504427.140	17	S	CMGC/MAPK/p38/MAPK12	GGPPPPQSPTAQPSE	6.293
wDILPKsPTQHFSR	0.00580199	2249.17	TcCLB.511181.140	hypothetical protein	TcChr38-S:1301576-1303879(+)	767	5.96e-07	13798.1	20765.4	1.50494	0.0208681	0.589705	TcCLB.511181.140	7	S	CMGC/MAPK/p38/MAPK12	*WDILPKSPTQHFSR	6.293
lQMSSAAPLtPQSLQNLLLER	0.000141103	2618.37	TcCLB.511751.200	epsilon-adaptin; putative;AP-1/4 adapter complex gamma/epsilon subunit; putative	TcChr32-S:456921-459950(+)	1009	7.71e-09	9696.82	13065.7	1.34742	0.0221011	0.430197	TcCLB.511751.200	10	T	CMGC/MAPK/p38/MAPK12	MSSAAPLTPQSLQNL	6.293
iFCAPPAALDKsPLPGTPVGSSHTK	0.00729801	3382.79	TcCLB.503409.10	hypothetical protein; conserved	TcChr33-S:674263-676737(+)	824	4.38e-07	20174.9	15745.9	0.780467	0.0192314	-0.357591	TcCLB.503409.10	12	S	CMGC/MAPK/p38/MAPK12	PPAALDKSPLPGTPV	6.293
sNIVFGDVNLVNsPR	0.0232445	1938.98	TcCLB.510241.124	hypothetical protein; conserved	TcChr8-S:251125-252663(-)	512	1.54e-06	193209	127735	0.661123	0.0132639	-0.597009	TcCLB.510241.124	13	S	CMGC/MAPK/p38/MAPK12	GDVNLVNSPR*****	6.293
ySVVSTFTNsPFVAVLEDTENNEDDEKELIR	5.01e-13	4097.97	TcCLB.511571.20	hypothetical protein; conserved	TcChr12-S:129573-130466(+)	297	1.63e-17	18141.1	10605.6	0.584615	0.04807	-0.77444	TcCLB.511571.20	10	S	CMGC/MAPK/p38/MAPK12	VVSTFTNSPFVAVLE	6.293
vVFSAqRsPASVLEDPLAQQQEIADFASER	1.7e-08	3597.78	TcCLB.507529.20	hypothetical protein; conserved	TcChr36-S:359240-361702(+)	820	4e-13	30452.8	17286.4	0.567646	0.0259728	-0.816936	TcCLB.507529.20	8	S	CMGC/MAPK/p38/MAPK12	VVFSAQRSPASVLED	6.293
vsPPSQSAHAVK	0.126704	1744.93	TcCLB.506885.200	hypothetical protein; conserved	TcChr39-S:959586-962696(-)	1036	1.95e-05	24781.3	41788.3	1.68629	0.00426585	0.753849	TcCLB.506885.200	2	S	CMGC/MAPK/p38/MAPK13	******VSPPSQSAH	4.706
eGVLLMDGtPAQQPLEPPK	0.0897736	2557.32	TcCLB.506513.180	hypothetical protein; conserved	TcChr17-S:569846-571582(+)	578	6.63e-06	4452.01	5921.16	1.33	0.0404218	0.411423	TcCLB.506513.180	9	T	CMGC/MAPK/p38/MAPK13	GVLLMDGTPAQQPLE	4.706
sQSGKEDEGVWAVyYTRPPTPESKPQNFNASSAEK	0.00176837	4880.44	TcCLB.506251.30	hypothetical protein; conserved	TcChr37-S:221153-222742(+)	529	8.43e-08	53284.7	42267	0.793231	0.0178325	-0.334187	TcCLB.506251.30	1	S	CMGC/MAPK/p38/MAPK13	*******SQSGKEDE	4.706
rsPTSWmQTTAFNDSGCGLLR	0.140585	2777.24	TcCLB.509007.70	hypothetical protein; conserved	TcChr31-S:586366-591096(+)	1576	6.22e-06	98681.1	76181.1	0.771993	0.0313051	-0.373341	TcCLB.509007.70	2	S	CMGC/MAPK/p38/MAPK13	******RSPTSWMQT	4.706
rVLtPSGGFDDTYSSGIELFDEIHR	0.000414676	3119.47	TcCLB.510257.130	protein kinase; putative	TcChr20-S:442613-444472(-)	619	1.65e-08	11713.2	8959.2	0.764883	0.00752945	-0.386689	TcCLB.510257.130	4	T	CMGC/MAPK/p38/MAPK13	****RVLTPSGGFDD	4.706
tPETTLGGVLAEVAPsLISHSFPLELGESqTAAHQELHPDLGR	0.000771383	4814.39	TcCLB.484949.9	serine/threonine protein kinase; putative	TcChr36-S:792017-793984(+)	656	3.74e-08	9162.43	6872.47	0.750071	0.0298007	-0.414902	TcCLB.484949.9	1	T	CMGC/MAPK/p38/MAPK13	*******TPETTLGG	4.706
sSGGGSFVSqDEsLGINPDETHTR	0.000140346	2786.23	TcCLB.506399.30	hypothetical protein; conserved	TcChr26-S:292151-293980(-)	609	6.58e-09	87603	64458.1	0.735798	0.0132463	-0.442618	TcCLB.506399.30	1	S	CMGC/MAPK/p38/MAPK13	*******SSGGGSFV	4.706
iPHDGsPTHSWR	0.000170033	1697.79	TcCLB.509149.70	hypothetical protein; conserved	TcChr27-S:575582-576595(+)	337	2.52e-08	23005	14898.6	0.647623	0.0135086	-0.626774	TcCLB.509149.70	6	S	CMGC/MAPK/p38/MAPK13	**IPHDGSPTHSWR*	4.706
sLPAVAHVPPPsPK	4.5e-05	1934.07	TcCLB.504427.270	hypothetical protein; conserved	TcChr22-S:341572-344160(-)	862	8.89e-09	37934.8	27605.4	0.727706	0.0389	-0.458573	TcCLB.504427.270	12	S	CMGC/MAPK/p38/MAPK14	VAHVPPPSPK*****	3.342
iLPQQTAVLQTsPLTQATYSHVPR	0.0208749	2957.55	TcCLB.510057.4	hypothetical protein; conserved	TcChr17-S:444239-445771(+)	511	1.32e-06	19078	12478	0.65405	0.0375149	-0.612528	TcCLB.510057.4	12	S	CMGC/MAPK/p38/MAPK14	QTAVLQTSPLTQATY	3.342
rIsLNPIVHEHIPPDYLSNLK	5.23e-05	2992.63	TcCLB.511039.3	ethanolamine phosphotransferase; putative	TcChr37-S:361896-362198(+)	101	5.2e-09	13946.6	17525.5	1.25662	0.0153251	0.329545	TcCLB.511039.3	3	S	Other/AUR/AurB/AURKB	*****RISLNPIVHE	9.769
rNsNPFFVGVLNPGNGNENHHK	0.00330224	2985.48	TcCLB.503697.130	hypothetical protein; conserved	TcChr36-S:1023598-1027260(-)	1220	1.58e-07	24072.3	16454.1	0.683529	0.0416942	-0.548925	TcCLB.503697.130	3	S	Other/AUR/AurB/AURKB	*****RNSNPFFVGV	9.769
tFtLCGTPEYLAPEVIQSR	0.0268519	2558.23	TcCLB.509805.10	protein kinase A catalytic subunit; putative	TcChr40-S:949286-949888(+)	200	1.04e-06	38196.3	48502.3	1.26982	0.0381735	0.34462	TcCLB.509805.10	3	T	Other/CAMKK/Meta/CaMKK2	*****TFTLCGTPEY	7.822
sLSHsLSHSISRPTSVSPR	0.447351	2343.18	TcCLB.506529.250	hypothetical protein; conserved	TcChr6-S:81981-86255(-)	1424	3.5e-05	31319.2	24443.2	0.780457	0.0189186	-0.35761	TcCLB.506529.250	1	S	Other/IKK/IKKb/IKBKB	*******SLSHSLSH	8.506
sDDEGNFTQQGGEQTGSLTYPmQAGALKK	1.28e-06	3611.69	TcCLB.506925.120	eukaryotic initiation factor 5a; putative	TcChr39-S:152674-153177(+)	167	3.48e-11	68411.8	50485.4	0.737964	0.0172604	-0.438378	TcCLB.506925.120	1	S	Other/IKK/IKKb/IKBKB	*******SDDEGNFT	8.506
sESDAKVESDVVPPsPK	1.11e-07	2537.32	TcCLB.509157.90	hypothetical protein; conserved	TcChr35-S:729971-732295(+)	774	6.43e-12	126737	88498.1	0.698281	0.0174045	-0.51812	TcCLB.509157.90	1	S	Other/IKK/IKKb/IKBKB	*******SESDAKVE	8.506
vPASAQLLEEDsGGCGELPSLATFDCPTNFHAR	0.000271523	3990.79	TcCLB.507143.40	hypothetical protein; conserved	TcChr3-S:158434-160770(+)	778	1.1e-08	2046.34	4966.65	2.42708	0.00467727	1.27922	TcCLB.507143.40	12	S	Other/NEK/NEK11/NEK11	AQLLEEDSGGCGELP	5.067
sLmNGPVAADIPDsPPPAAPSKK	0.000573608	3042.61	TcCLB.508719.70	flagellum targeting protein kharon1; putative (KH1)	TcChr37-S:375185-376402(+)	405	3.76e-08	30562.3	21320.4	0.697603	0.0279972	-0.519522	TcCLB.508719.70	14	S	Other/NEK/NEK11/NEK11	VAADIPDSPPPAAPS	5.067
tLMQLFAEFNIsDDEEEMAPVNHPTGK	2.13e-09	3600.68	TcCLB.507077.30	hypothetical protein; conserved	TcChr30-S:462044-463132(-)	362	5.84e-14	16046.8	22444.6	1.3987	0.0401362	0.484082	TcCLB.507077.30	12	S	Other/NEK/NEK2/NEK2	LFAEFNISDDEEEMA	5.105
tSLmSDsPATPPVSFSR	0.122824	2103.97	TcCLB.510241.90	hypothetical protein; conserved	TcChr8-S:243329-245323(-)	664	8.94e-06	26305.9	20433.2	0.776754	0.0223782	-0.364471	TcCLB.510241.90	7	S	Other/NEK/NEK6/NEK6	*TSLMSDSPATPPVS	5.103
nHVGYqPPLPESEVKEqDDPEPGEsAGENR	7.35e-07	3843.77	TcCLB.510877.30	hypothetical protein; conserved	TcChr34-S:531764-532456(-)	230	3.16e-11	75012.6	54026.7	0.720235	0.0106182	-0.473461	TcCLB.510877.30	25	S	Other/NEK/NEK6/NEK6	DDPEPGESAGENR**	5.103
qHHQQQQQSSSTHELPtIF	0.0929783	2569.19	TcCLB.510285.80	hypothetical protein; conserved	TcChr16-S:296835-299390(+)	851	5.05e-06	65298.9	44112.9	0.675553	0.0180471	-0.565858	TcCLB.510285.80	17	T	Other/NEK/NEK6/NEK6	SSTHELPTIF*****	5.103
fLHVVTDAAGsPVNsIVGEVSPNSTSR	2.57e-06	3128.47	TcCLB.510297.10	hypothetical protein; conserved	TcChr20-S:148692-149315(+)	207	7.58e-11	16301	47822.6	2.93372	0.00602704	1.55273	TcCLB.510297.10	15	S	Other/NEK/NEK9	AAGSPVNSIVGEVSP	7.983
fLHVVTDAAGsPVNsIVGEVSPNSTSRGDSPSSDITVNPR	0.000662782	4454.09	TcCLB.510297.10	hypothetical protein; conserved	TcChr20-S:148692-149315(+)	207	2.49e-08	62776.6	83240	1.32597	0.012261	0.407051	TcCLB.510297.10	15	S	Other/NEK/NEK9	AAGSPVNSIVGEVSP	7.983
tPETTLGGVLAEVAPsLISHSFPLELGESqTAAHQELHPDLGR	0.000771383	4814.39	TcCLB.484949.9	serine/threonine protein kinase; putative	TcChr36-S:792017-793984(+)	656	3.74e-08	9162.43	6872.47	0.750071	0.0298007	-0.414902	TcCLB.484949.9	16	S	Other/NEK/NEK9/NEK9	VLAEVAPSLISHSFP	7.983
tLVNPNTQPSQVECLLsSK	0.234465	2720.38	TcCLB.510763.60	hypothetical protein; conserved	TcChr39-S:1767426-1768151(+)	241	9.2e-06	65440.1	47996.4	0.733441	0.00255004	-0.447247	TcCLB.510763.60	1	T	Other/NEK/NEK9/NEK9	*******TLVNPNTQ	7.983
smEHsLNEYTFHPR	0.119774	2071.9	TcCLB.510323.20	hypothetical protein; conserved	TcChr36-S:642107-645259(+)	1050	1.22e-05	29897.6	21420	0.716445	0.0207694	-0.481071	TcCLB.510323.20	5	S	Other/NEK/NEK9/NEK9	***SMEHSLNEYTFH	7.983
eSPGDIGEAVATAsR	0.169173	1767.83	TcCLB.503751.30	hypothetical protein; conserved (pseudogene)	TcChr17-S:455685-456482(+)	266	2.32e-05	23874.6	18842.4	0.789224	0.044722	-0.341493	TcCLB.503751.30	14	S	Other/PEK	GEAVATASR******	4.722
aSIVFELEPGTDsGSK	0.10458	2174.09	TcCLB.511871.100	hypothetical protein; conserved	TcChr15-S:93601-95541(+)	646	7.35e-06	15913.2	12447.1	0.782192	0.0197516	-0.354405	TcCLB.511871.100	13	S	Other/PEK	ELEPGTDSGSK****	4.722
gTPPDKEFAPCnGWGmIVLsSPK	0.0205485	3339.67	TcCLB.511587.30	retrotransposon hot spot protein (RHS; pseudogene); putative	TcChr18-S:60922-63873(-)	984	7.44e-07	22045.5	14417.6	0.653993	0.0272153	-0.612654	TcCLB.511587.30	20	S	Other/PEK	GWGMIVLSSPK****	4.722
vLsSEERGQLVEALSNVAK	0.469177	2566.37	TcCLB.503595.10	hypothetical protein; conserved	TcChr12-S:123806-125860(+)	684	3.34e-05	64459.5	43328.6	0.672183	0.0026743	-0.573074	TcCLB.503595.10	3	S	Other/PEK/GCN2/GCN2	*****VLSSEERGQL	6.95
sETLNLALLRHsDTGNLR	0.0233242	2318.19	TcCLB.511363.4	hypothetical protein; conserved	TcChr40-S:176639-177388(-)	250	1.61e-06	73829.4	58532.6	0.792809	0.03219	-0.334954	TcCLB.511363.4	1	S	Other/PEK/HRI/EIF2AK1	*******SETLNLAL	4.658
vNEFSQGNISLTGGGSSLNTStRPTPR	0.378679	3085.51	TcCLB.508567.100	hypothetical protein; conserved	TcChr19-S:161519-165736(-)	1405	1.38e-05	70700.9	53778.5	0.760648	0.0320938	-0.394699	TcCLB.508567.100	22	T	Other/PEK/HRI/EIF2AK1	GSSLNTSTRPTPR**	4.658
sAQTGISAPVAVsHYRFSPPR	0.0229821	2536.28	TcCLB.509967.70	katanin; putative	TcChr10-S:187410-189455(+)	681	1.06e-06	52821.6	34707.8	0.657076	0.0197646	-0.605868	TcCLB.509967.70	13	S	Other/PEK/HRI/EIF2AK1	ISAPVAVSHYRFSPP	4.658
iDPLQVDHLmHPNIEPGAAKsNKPIGK	0.000109992	3931.15	TcCLB.510101.140	pyruvate phosphate dikinase; putative	TcChr27-S:114555-117296(-)	913	1.66e-08	30995.8	17249.7	0.556518	0.014326	-0.845499	TcCLB.510101.140	21	S	Other/PEK/HRI/EIF2AK1	IEPGAAKSNKPIGK*	4.658
tGFVRPSAPNELLATIPSALsRR	6.56e-05	2761.47	TcCLB.510565.50	hypothetical protein; conserved	TcChr33-S:544418-546235(+)	605	6.1e-09	48925.9	34226.9	0.699567	0.0234548	-0.515465	TcCLB.510565.50	21	S	Other/PEK/PEK/EIF2AK3	ATIPSALSRR*****	8
tKPGLEIVLPGDVGVTGVYDPAsIVRSPTR	0.000256536	3630.97	TcCLB.509445.20	hypothetical protein; conserved	TcChr7-S:256253-257659(+)	468	2.27e-08	32653.2	20507.5	0.62804	0.0331207	-0.671071	TcCLB.509445.20	1	T	Other/PEK/PKR/EIF2AK2	*******TKPGLEIV	4
aQCLHGIESALAALGVEEsEEPAAAAImR	0.00260706	3386.6	TcCLB.506673.69	hypothetical protein; conserved	TcChr16-S:331365-335453(+)	1363	6.79e-08	12966.8	16394.3	1.26433	0.0151361	0.338373	TcCLB.506673.69	19	S	Other/PLK	AALGVEESEEPAAAA	10.591
gIIAPTSCGWsDILGGGsAASRASVTAGGEHVIK	0.101836	3967.92	TcCLB.510535.20	hypothetical protein; conserved	TcChr13-S:453100-461118(+)	2672	3.22e-06	15390.7	18571	1.20664	0.0426175	0.270996	TcCLB.510535.20	18	S	Other/PLK	SDILGGGSAASRASV	10.591
gIPDsIKLASGK	0.155144	1952.13	TcCLB.509651.10	hypothetical protein; conserved	TcChr40-S:521768-523051(+)	427	4.77e-05	313129	237478	0.758403	0.0367772	-0.398963	TcCLB.509651.10	5	S	Other/PLK	***GIPDSIKLASGK	10.591
hATEGNEAsLVCALTAR	0.0120291	2176.02	TcCLB.511109.70	hypothetical protein; conserved	TcChr23-S:292122-295208(-)	1028	7.93e-07	39066.6	27914.3	0.714529	0.0448296	-0.484935	TcCLB.511109.70	9	S	Other/PLK	ATEGNEASLVCALTA	10.591
eSPNEsMFTVENK	0.521882	2048.95	TcCLB.506801.80	cysteine peptidase inhibitor;chagasin (CHA)	TcChr26-S:256181-256513(+)	110	4.24e-05	71604.5	50840.9	0.710024	0.0255392	-0.49406	TcCLB.506801.80	6	S	Other/PLK	**ESPNESMFTVENK	10.591
aANTAVKSEEEssLHEAEKEPER	0.0606271	3387.61	TcCLB.510855.40	proteasome regulatory non-ATPase subunit; putative	TcChr19-S:126705-127733(-)	342	2.06e-06	60773.2	41738.3	0.686789	0.0269829	-0.542062	TcCLB.510855.40	12	S	Other/PLK	AVKSEEESSLHEAEK	10.591
aANTAVKSEEEssLHEAEKEPER	0.0606271	3387.61	TcCLB.510855.40	proteasome regulatory non-ATPase subunit; putative	TcChr19-S:126705-127733(-)	342	2.06e-06	60773.2	41738.3	0.686789	0.0269829	-0.542062	TcCLB.510855.40	13	S	Other/PLK	VKSEEESSLHEAEKE	10.591
dNEsEDNINALEGYEYDDmHKGGKK	0.0917989	3882.83	TcCLB.508265.100	hypothetical protein; conserved	TcChr11-S:473721-477221(+)	1166	2.92e-06	58990.1	33157.5	0.562086	0.0483276	-0.831138	TcCLB.508265.100	4	S	Other/PLK	****DNESEDNINAL	10.591
dNEsEDNINALEGYEYDDmHKGGK	8.34e-06	3525.58	TcCLB.508265.100	hypothetical protein; conserved	TcChr11-S:473721-477221(+)	1166	4.27e-10	261538	131046	0.501059	0.0244506	-0.996948	TcCLB.508265.100	4	S	Other/PLK	****DNESEDNINAL	10.591
aLQGGSsGGGIIIHSSK	0.023132	2106.12	TcCLB.511143.12	hypothetical protein; conserved	TcChr10-S:413664-415454(-)	596	2.48e-06	54999.9	26408.1	0.480149	0.00913672	-1.05845	TcCLB.511143.12	7	S	Other/PLK	*ALQGGSSGGGIIIH	10.591
wSILEYDGEADEDsDDAS	0.0153174	2324.9	TcCLB.510297.50	hypothetical protein; conserved	TcChr20-S:164950-166221(+)	423	1.98e-06	16279.9	21236.4	1.30445	0.00335486	0.383442	TcCLB.510297.50	14	S	Other/PLK/PLK1/CDC5	DGEADEDSDDAS***	6.964
sRPEWVDNFLSPEGDHAVEDDGNSsNEmAKPPPK	0.00193538	4534.15	TcCLB.504125.60	MCAK-like kinesin; putative	TcChr26-S:607716-609365(-)	549	8.61e-08	37775.2	30199.9	0.799463	0.0356333	-0.322897	TcCLB.504125.60	25	S	Other/PLK/PLK1/CDC5	VEDDGNSSNEMAKPP	6.964
sILNTVLDTADGsDDDEVmR	0.110484	2490.11	TcCLB.510565.50	hypothetical protein; conserved	TcChr33-S:544418-546235(+)	605	4.1e-06	22888.2	17574.9	0.767857	0.0173102	-0.38109	TcCLB.510565.50	13	S	Other/PLK/PLK1/CDC5	VLDTADGSDDDEVMR	6.964
nVFVPHInGDTsDSEPHVTPDAATNAPR	0.000939641	3267.51	TcCLB.506695.20	hypothetical protein; conserved	TcChr36-S:708009-709106(+)	365	3.8e-08	46081.6	35303.4	0.766106	0.0133789	-0.384384	TcCLB.506695.20	12	S	Other/PLK/PLK1/CDC5	PHINGDTSDSEPHVT	6.964
qAEQAAATLSEDsVSNSAETLAQEAR	4.05e-06	2985.38	TcCLB.506213.100	hypothetical protein; conserved	TcChr40-S:494843-496846(+)	667	1.91e-10	26753	20335.4	0.760119	0.00101817	-0.395702	TcCLB.506213.100	13	S	Other/PLK/PLK1/CDC5	AATLSEDSVSNSAET	6.964
lNAASPAAEASPnTtPSSFFLPVISGGGSPK	4.3e-05	3510.77	TcCLB.509805.210	hypothetical protein; conserved	TcChr40-S:1000573-1003593(+)	1006	1.51e-09	60220.4	45668.8	0.758362	0.0296319	-0.399042	TcCLB.509805.210	15	T	Other/PLK/PLK1/CDC5	AEASPNTTPSSFFLP	6.964
sAESLPsDESEAHQQPQPQKK	0.15444	2900.39	TcCLB.509267.110	heat shock protein Hsp20; putative	TcChr35-S:625238-625864(+)	208	6.27e-06	47482	29233.1	0.615666	0.0455483	-0.699781	TcCLB.509267.110	1	S	Other/PLK/PLK1/CDC5	*******SAESLPSD	6.964
lVDALLQDPtASPK	0.428841	2005.09	TcCLB.509979.60	sec1 family transport protein; putative	TcChr33-S:844998-846881(+)	627	7.88e-05	11118.8	6370.83	0.572978	0.00298349	-0.803449	TcCLB.509979.60	10	T	Other/PLK/PLK1/CDC5	DALLQDPTASPK***	6.964
sSGGGSFVSqDEsLGINPDETHTR	0.000140346	2786.23	TcCLB.506399.30	hypothetical protein; conserved	TcChr26-S:292151-293980(-)	609	6.58e-09	87603	64458.1	0.735798	0.0132463	-0.442618	TcCLB.506399.30	13	S	Other/PLK/PLK1/PLK1	SFVSQDESLGINPDE	3.783
eLEGDDHNnNDDGmADsGVEDDDDDDENDDDDVDDNFKK	1.53e-298	5156.02	TcCLB.507809.100	hypothetical protein; conserved	TcChr21-S:432980-437824(+)	1614	4.82e-301	47292.3	34786.2	0.735557	0.0279864	-0.443091	TcCLB.507809.100	17	S	Other/PLK/PLK2/PLK2	NDDGMADSGVEDDDD	6.272
hYAGDEEEEEGKGKDsDNETK	1.61e-05	3362.59	TcCLB.506563.100	hypothetical protein; conserved	TcChr9-S:468924-469847(+)	307	6.93e-10	64921.4	43893.6	0.676104	0.0434324	-0.564684	TcCLB.506563.100	16	S	Other/PLK/PLK2/PLK2	EEGKGKDSDNETK**	6.272
lCIPEGPmTVEKIsPLNK	0.147367	2876.53	TcCLB.506885.354	hypothetical protein; conserved	TcChr39-S:1002423-1003091(-)	222	1.2e-05	83318	66442.5	0.797457	0.0490052	-0.326522	TcCLB.506885.354	14	S	Other/PLK/PLK2/PLK3	PMTVEKISPLNK***	4.021
iLSIDSSSsPLSK	0.0156967	1871.01	TcCLB.506945.10	hypothetical protein; conserved	TcChr32-S:888161-889132(+)	323	1.51e-06	452622	349554	0.772289	0.0115058	-0.372788	TcCLB.506945.10	9	S	Other/PLK/PLK2/PLK3	LSIDSSSSPLSKSLS	4.021
rEQANTSSATVSsPTAEISR	0.000408528	2400.14	TcCLB.509589.30	MCAK-like kinesin; putative	TcChr14-S:543423-545597(-)	724	1.9e-08	29168.2	21195.1	0.726652	0.00638708	-0.460663	TcCLB.509589.30	13	S	Other/PLK/PLK2/PLK3	TSSATVSSPTAEISR	4.021
nAPALAAAAAAVQQmRsPTVTTHQPYR	0.000100375	3145.56	TcCLB.430061.9	hypothetical protein; conserved	TcChr40-S:1836598-1837758(-)	387	3.87e-09	41571.1	27597.2	0.663856	0.0222982	-0.591057	TcCLB.430061.9	17	S	Other/PLK/PLK2/PLK3	AAVQQMRSPTVTTHQ	4.021
kKTEsELVATNNSDDLPLDILR	9.93e-07	3237.74	TcCLB.506493.9	hypothetical protein; conserved	TcChr5-S:131829-134471(-)	881	5.59e-11	31423.1	23229.9	0.739263	0.0403633	-0.43584	TcCLB.506493.9	5	S	Other/PLK/SAK/PLK4	***KKTESELVATNN	4.9
nTFELTNGTPTIAGVSFVSNSsPTGGAPSFFR	1.79e-05	3568.69	TcCLB.510105.130	phosphatidylinositol-4-phosphate 5-kinase type II beta; putative	TcChr4-S:107793-110555(-)	920	4.4e-10	27916.3	19866.8	0.711654	0.00171752	-0.490753	TcCLB.510105.130	22	S	Other/PLK/SAK/PLK4	VSFVSNSSPTGGAPS	4.9
sFRGDEsLGqALPFDAIATYTADYPPK	0.00135216	3468.69	TcCLB.511065.10	STOP axonemal protein; putative	TcChr26-S:148493-149293(+)	266	4.17e-08	12150	8294.22	0.682654	0.0385322	-0.550774	TcCLB.511065.10	7	S	Other/PLK/SAK/PLK4	*SFRGDESLGQALPF	4.9
fPLDFNAFMQEIAEEAKEDPEEsEEDEDLQR	6.82e-07	4237.89	TcCLB.505843.30	hypothetical protein; conserved	TcChr7-S:266676-268676(+)	666	4.58e-11	678728	537933	0.79256	0.0499164	-0.335408	TcCLB.505843.30	23	S	Other/ULK/ULK/ULK1	AKEDPEESEEDEDLQ	4.508
yANAAAAAGLGETADVVSNEVDEADEGNsDDNNDNAEEVEDEMPATNGGGR	2.27e-05	5448.26	TcCLB.510317.7	hypothetical protein; conserved (fragment)	TcChr36-S:679268-683104(+)	1279	1.46e-08	11286.2	25518.9	2.26106	0.0116404	1.177	TcCLB.510317.7	29	S	Other/ULK/ULK/ULK3	DEADEGNSDDNNDNA	3.15
iPTGVStSSSPSKDPVK	0.379954	2453.34	TcCLB.511733.90	hypothetical protein; conserved	TcChr32-S:767045-767395(-)	116	3.49e-05	239753	168496	0.70279	0.0202195	-0.508834	TcCLB.511733.90	7	T	Other/ULK/ULK/ULK3	*IPTGVSTSSSPSKD	3.15
lEQALAVNPFGqAGIsTFQPK	0.0451959	2754.44	TcCLB.508973.110	hypothetical protein; conserved	TcChr19-S:422841-424253(+)	470	2.27e-06	37823.8	29195	0.771868	0.0347819	-0.373574	TcCLB.508973.110	16	S	Other/WEE/Myt1/PKMYT1	PFGQAGISTFQPK**	5.583
rEEPDELQIGDSLNsPKQPNK	1.63e-09	3160.64	TcCLB.509979.30	hypothetical protein; conserved	TcChr33-S:858307-871584(+)	4425	7.81e-14	232457	177266	0.762576	0.021201	-0.391046	TcCLB.509979.30	15	S	Other/WEE/Myt1/PKMYT1	QIGDSLNSPKQPNK*	5.583
vVRsHAAPLNEVTQEDLK	0.00938095	2543.35	TcCLB.506699.34	6-phospho-1-fructokinase (pseudogene); putative	TcChr36-S:651580-653037(+)	486	6.61e-07	17711	12600.3	0.711441	0.0330505	-0.491183	TcCLB.506699.34	4	S	Other/WEE/Myt1/PKMYT1	****VVRSHAAPLNE	5.583
iLSIDsSSSPLsKSLSGDELLTVSHVLHELGK	0.487851	4195.2	TcCLB.506945.10	hypothetical protein; conserved	TcChr32-S:888161-889132(+)	323	2.33e-05	13636.2	9137.72	0.670108	0.00889707	-0.577534	TcCLB.506945.10	6	S	Other/WEE/Myt1/PKMYT1	**ILSIDSSSSPLSK	5.583
aPPSRtPLRPALQQDVPFLDTHLVR	0.0692173	3132.68	TcCLB.507083.109	hypothetical protein; conserved (fragment)	TcChr25-S:344674-359217(+)	4848	4.54e-06	38630.6	28289.4	0.732306	0.00684757	-0.449481	TcCLB.507083.109	6	S	Other/Wnk/Wnk4	**NAVPCSLPSIKPL	7.367
sLSHsLSHSISRPTSVSPR	0.447351	2343.18	TcCLB.506529.250	hypothetical protein; conserved	TcChr6-S:81981-86255(-)	1424	3.5e-05	31319.2	24443.2	0.780457	0.0189186	-0.35761	TcCLB.506529.250	5	S	STE/STE11/MEKK1/MAP3K1	***SLSHSLSHSISR	3.517
kSDLFPPFLPSRVSIAsANsQAFTPPK	0.000394583	3748.95	TcCLB.503885.100	hypothetical protein; conserved	TcChr26-S:168686-170212(+)	508	1.95e-08	29660.8	22644.4	0.763443	0.04076	-0.389407	TcCLB.503885.100	20	S	STE/STE11/MEKK1/MAP3K1	VSIASANSQAFTPPK	3.517
kLEAGqLFNsKSPDIEPR	0.00441807	2796.49	TcCLB.508719.70	flagellum targeting protein kharon1; putative (KH1)	TcChr37-S:375185-376402(+)	405	3.62e-07	425248	293303	0.689721	0.0456246	-0.535916	TcCLB.508719.70	10	S	STE/STE11/MEKK1/MAP3K1	EAGQLFNSKSPDIEP	3.517
lLLHPSHnGAAALASASIEsPVGR	0.000464697	2677.38	TcCLB.507757.50	serine/threonine-protein phosphatase PP1; putative	TcChr31-S:294995-296050(+)	351	2.12e-08	45505.8	29718	0.653059	0.0247471	-0.614714	TcCLB.507757.50	20	S	STE/STE11/MEKK1/MAP3K1	LASASIESPVGR***	3.517
kAGDGEGEDEKEDETEATEAGmQsENGAR	0.159656	3822.7	TcCLB.507629.30	hypothetical protein; conserved	TcChr14-S:455603-458698(-)	1031	1.08e-05	24059.8	15916.2	0.661526	0.00468743	-0.596131	TcCLB.507629.30	24	S	STE/STE11/MEKK2/MAP3K3	ATEAGMQSENGAR**	2.383
iANQQSSsPRPGTNVGAAPFIPGGK	9.75e-05	2988.56	TcCLB.506945.260	hypothetical protein; conserved	TcChr32-S:932501-933628(+)	375	4.08e-09	399073	243291	0.609641	0.0457839	-0.713967	TcCLB.506945.260	8	S	STE/STE11/MEKK2/MAP3K3	IANQQSSSPRPGTNV	2.383
iIDFGSSCYLTDNLSsYVQSR	7.6e-09	2801.29	TcCLB.506869.60	protein kinase; putative	TcChr10-S:431795-433609(-)	604	1.76e-13	16579.1	24343	1.46829	0.0428803	0.554139	TcCLB.506869.60	16	S	STE/STE20/FRAY/OSR1	YLTDNLSSYVQSR**	1.307
tVPLGFtFSFPTEQK	0.0610271	2236.15	TcCLB.508951.20	hexokinase; putative	TcChr5-S:117169-118584(-)	471	5.93e-06	5009.42	2840.04	0.566939	0.0217397	-0.818734	TcCLB.508951.20	7	T	STE/STE20/FRAY/STLK3	*TVPLGFTFSFPTEQ	5.467
aVsPLsSQEVQAVVNAR	0.0110389	2143.02	TcCLB.506543.100	hypothetical protein; conserved	TcChr40-S:1825570-1827987(-)	805	6.95e-07	2848.93	5708.44	2.00372	0.0227716	1.00268	TcCLB.506543.100	6	S	STE/STE20/KHS/HPK1	**TKVTASANGLGPG	5.683
eCHGAPSIGmQSPQAsLISPLLPFLSTTGDEDR	0.0378737	3903.8	TcCLB.511621.130	hypothetical protein; conserved	TcChr23-S:439661-442417(-)	918	1.09e-06	3615.66	5806.18	1.60584	0.028704	0.683329	TcCLB.511621.130	16	S	STE/STE20/KHS/HPK1	GMQSPQASLISPLLP	5.683
sNLFVSGLHAsVTDNELYK	0.157299	2631.33	TcCLB.506399.40	hypothetical protein; conserved	TcChr26-S:289382-291187(-)	601	6.74e-06	54500.9	70074.9	1.28576	0.0242502	0.362618	TcCLB.506399.40	11	S	STE/STE20/KHS/HPK1	FVSGLHASVTDNELY	5.683
kSDLFPPFLPSRVSIAsANsQAFTPPK	0.000394583	3748.95	TcCLB.503885.100	hypothetical protein; conserved	TcChr26-S:168686-170212(+)	508	1.95e-08	29660.8	22644.4	0.763443	0.04076	-0.389407	TcCLB.503885.100	17	S	STE/STE20/KHS/HPK1	PSRVSIASANSQAFT	5.683
tKVTAsAnGLGPGVSLNK	8.67e-08	2481.38	TcCLB.506543.100	hypothetical protein; conserved	TcChr40-S:1825570-1827987(-)	805	1.13e-11	78309.7	51318.4	0.655327	0.0234268	-0.609713	TcCLB.506543.100	6	S	STE/STE20/KHS/HPK1	**TKVTASANGLGPG	5.683
tKPGLEIVLPGDVGVTGVYDPAsIVRSPTR	0.000256536	3630.97	TcCLB.509445.20	hypothetical protein; conserved	TcChr7-S:256253-257659(+)	468	2.27e-08	32653.2	20507.5	0.62804	0.0331207	-0.671071	TcCLB.509445.20	23	S	STE/STE20/KHS/HPK1	TGVYDPASIVRSPTR	5.683
lLLHPSHNGAAALAsASIESPVGR	7.28e-05	2676.39	TcCLB.507757.50	serine/threonine-protein phosphatase PP1; putative	TcChr31-S:294995-296050(+)	351	3.61e-09	17165.3	10522.8	0.613029	0.0177114	-0.705973	TcCLB.507757.50	15	S	STE/STE20/KHS/HPK1	NGAAALASASIESPV	5.683
tITVVSHLGEPLsPR	0.00698539	1914.01	TcCLB.506179.59	ATP-dependent RNA helicase; putative (fragment)	TcChr14-S:97278-98330(-)	351	9.57e-07	23348	17722.3	0.759047	0.0447251	-0.397738	TcCLB.506179.59	1	T	STE/STE20/MSN/MAP4K4	*******TITVVSHL	9
iETVVLSDLFtPMSTTPAATRPQSSK	5.69e-06	3314.72	TcCLB.506775.40	hypothetical protein; conserved	TcChr27-S:290803-292173(-)	456	2.74e-10	14735.5	20037	1.35978	0.000457478	0.44337	TcCLB.506775.40	11	T	STE/STE20/MST/MST1	VVLSDLFTPMSTTPA	9.234
tVsELNSALLAVASTqR	0.0885968	2069.06	TcCLB.510283.120	hypothetical protein; conserved	TcChr16-S:267900-269588(+)	562	7.83e-06	8020.25	10062.6	1.25465	0.0189147	0.327287	TcCLB.510283.120	1	T	STE/STE20/MST/MST1	*******TVSELNSA	9.234
tALPDGVVEQHPEYFSVLSPPPILSIASAGCNIsSEDVDRETYGNDSSANR	1.83e-11	5837.71	TcCLB.506825.150	hypothetical protein; conserved	TcChr27-S:642706-644904(+)	732	1.56e-15	19816.5	15443.4	0.779321	0.0231942	-0.359711	TcCLB.506825.150	34	S	STE/STE20/MST/MST1	ASAGCNISSEDVDRE	9.234
hTPELHDLsKEGsDVPLTGTSGNGGSAPAR	0.0117642	3604.7	TcCLB.511871.90	hypothetical protein; conserved	TcChr15-S:90161-91909(+)	582	3.75e-07	36763.6	28050.9	0.763006	0.0467343	-0.390233	TcCLB.511871.90	13	S	STE/STE20/MST/MST1	HDLSKEGSDVPLTGT	9.234
fEHALHETPEEARSLDAEtSSVASTLER	0.00241758	3420.59	TcCLB.510599.30	hypothetical protein; conserved	TcChr31-S:145703-148474(+)	923	8.78e-08	21747.9	16211.7	0.745439	0.0220205	-0.423838	TcCLB.510599.30	19	T	STE/STE20/MST/MST1	ARSLDAETSSVASTL	9.234
sEFIESPIFITGNtTAPVSVSSQLTVK	0.100675	3389.78	TcCLB.507735.50	hypothetical protein; conserved (pseudogene)	TcChr34-S:805689-811841(+)	2050	3.84e-06	9573.11	6758.52	0.70599	0.00919848	-0.502279	TcCLB.507735.50	14	T	STE/STE20/MST/MST1	PIFITGNTTAPVSVS	9.234
iLSIDsSSSPLsKSLSGDELLTVSHVLHELGK	0.487851	4195.2	TcCLB.506945.10	hypothetical protein; conserved	TcChr32-S:888161-889132(+)	323	2.33e-05	13636.2	9137.72	0.670108	0.00889707	-0.577534	TcCLB.506945.10	12	S	STE/STE20/PAKA/CLA4	DSSSSPLSKSLSGDE	6.75
rPLsPPPSVGTALR	0.00269235	1755.96	TcCLB.510409.30	hypothetical protein; conserved	TcChr11-S:435936-437711(+)	591	5.35e-07	34660.8	22401.8	0.646315	0.0200683	-0.62969	TcCLB.510409.30	4	S	STE/STE20/PAKA/CLA4	****RPLSPPPSVGT	6.75
lVAVLQSELEAsQHEK	0.000687685	2318.23	TcCLB.504149.124	conserved protein; unknown function	TcChr27-S:40936-41508(-)	190	5.47e-08	246394	315943	1.28227	0.0419286	0.358698	TcCLB.504149.124	12	S	STE/STE20/PAKA/PAK2	LQSELEASQHEK***	2.05
nKSCTESLFEtAPLGHQQSFSLLSQR	0.000683799	3570.75	TcCLB.511037.40	hypothetical protein; conserved	TcChr37-S:466675-468429(+)	584	2.33e-08	33479.5	26048.5	0.778043	0.0432677	-0.362078	TcCLB.511037.40	11	T	STE/STE20/PAKA/PAK3	CTESLFETAPLGHQQ	8.753
rSDNDGDKPSGVsPVEPEsPLEEGSDLTNFTTLYVCPGCGAR	0.00863364	5263.35	TcCLB.480653.10	hypothetical protein; conserved	TcChr23-S:239516-240436(-)	306	9.31e-07	9143.13	14204.2	1.55354	0.0109796	0.635559	TcCLB.480653.10	19	S	STE/STE20/PAKA/STE20	VSPVEPESPLEEGSD	5.67
rPSsAAEATGTSTGGTAPASLAK	0.00252181	2626.33	TcCLB.511419.20	hypothetical protein; conserved	TcChr9-S:83263-85122(-)	619	1.14e-07	60339.7	45278.7	0.750397	0.0281897	-0.414275	TcCLB.511419.20	4	S	STE/STE20/PAKA/STE20	****RPSSAAEATGT	5.67
rCsLDVASDSSGTPAK	0.069502	2256.08	TcCLB.504425.70	hypothetical protein; conserved	TcChr22-S:258213-261728(+)	1171	3.9e-06	90524.5	70821.1	0.782342	0.0292593	-0.354129	TcCLB.504425.70	3	S	STE/STE20/PAKB/PAK4	*****RCSLDVASDS	5.333
tNIYHQHLLDAPmRQsLK	0.28388	2718.41	TcCLB.507735.50	hypothetical protein; conserved (pseudogene)	TcChr34-S:805689-811841(+)	2050	1.78e-05	51494	34063.9	0.661512	0.0150174	-0.596161	TcCLB.507735.50	16	S	STE/STE20/PAKB/PAK4	LDAPMRQSLK*****	5.333
eANLSDRsVQLNDVDLSCIAEALCSTAHSIR	3.38e-07	3888.82	TcCLB.511801.10	hypothetical protein; conserved	TcChr30-S:482114-484561(-)	815	1.21e-11	3840.43	7357.9	1.91591	0.000919321	0.938026	TcCLB.511801.10	8	S	STE/STE20/PAKB/PAK5	EANLSDRSVQLNDVD	6.238
eLPLDDDsDFVAMEQER	0.000522897	2317	TcCLB.511441.10	calpain cysteine peptidase; putative;cysteine peptidase; Clan CA; family C2; putative	TcChr39-S:259237-263064(+)	1275	4.12e-08	8961.01	6316.93	0.704935	0.0180799	-0.504438	TcCLB.511441.10	8	S	STE/STE20/PAKB/PAK5	ELPLDDDSDFVAMEQ	6.238
tLQDANVVGTPAAsTESLTPLLDELELHAFNSNTSPR	9.63e-10	4217.09	TcCLB.508215.10	hypothetical protein; conserved	TcChr29-S:640755-641876(+)	373	2.26e-14	10936.6	14693.3	1.3435	0.00848267	0.425996	TcCLB.508215.10	1	T	STE/STE20/SLK/LOK	*******TLQDANVV	7.9
tLHEEPNALEIADTAGDVSALAsSATDLVTLGK	2.63e-13	3846.96	TcCLB.506633.20	hypothetical protein; conserved	TcChr34-S:689358-694220(+)	1620	8.99e-18	17714.3	12678.3	0.715709	0.0304003	-0.482554	TcCLB.506633.20	1	T	STE/STE20/SLK/LOK	*******TLHEEPNA	7.9
tLHEEPNALEIADTAGDVsALASSATDLVTLGK	1.33e-14	3846.95	TcCLB.506633.20	hypothetical protein; conserved	TcChr34-S:689358-694220(+)	1620	3.43e-19	9359.5	6648.02	0.710296	0.0221132	-0.493507	TcCLB.506633.20	1	T	STE/STE20/SLK/LOK	*******TLHEEPNA	7.9
tFtLCGTPEYLAPEVIQSR	0.0268519	2558.23	TcCLB.509805.10	protein kinase A catalytic subunit; putative	TcChr40-S:949286-949888(+)	200	1.04e-06	38196.3	48502.3	1.26982	0.0381735	0.34462	TcCLB.509805.10	1	T	STE/STE20/TAO/TAOK1	*******TFTLCGTP	9
eAHENVHEsFVASPPHGEASQLPQQTVR	0.108619	3389.6	TcCLB.453917.9	hypothetical protein; conserved	TcChr40-S:519769-520851(+)	361	4.58e-06	15877.3	11235.9	0.707673	0.0373326	-0.498845	TcCLB.453917.9	9	S	STE/STE20/TAO/TAOK1	AHENVHESFVASPPH	9
gGTGGSTPDAEGLASTQNSQLPVAHVDVGSsDDEDNDNNK	0.141888	4493.01	TcCLB.506733.140	hypothetical protein; conserved	TcChr14-S:289724-292072(-)	782	1.16e-05	56073.2	101523	1.81053	0.0481831	0.856416	TcCLB.506733.140	31	S	STE/STE7/MEK1/MAP2K1	VAHVDVGSSDDEDND	1.141
lQPAANAEALGAtNPKK	9.67e-07	2460.37	TcCLB.507629.30	hypothetical protein; conserved	TcChr14-S:455603-458698(-)	1031	1.33e-10	89044.8	70656.7	0.793496	0.0423158	-0.333705	TcCLB.507629.30	13	T	STE/STE7/MEK1/MAP2K1	NAEALGATNPKK***	1.141
rGGTGGSTPDAEGLASTQNSQLPVAHVDVGsSDDEDNDNNKK	2.16e-11	5006.38	TcCLB.506733.140	hypothetical protein; conserved	TcChr14-S:289724-292072(-)	782	1.18e-15	30948.7	23420.7	0.756759	0.0418989	-0.402093	TcCLB.506733.140	31	S	STE/STE7/MEK1/MAP2K1	VAHVDVGSSDDEDND	1.141
lLHFGVDDNKLSEtDGSPTK	0.0232191	2939.52	TcCLB.510859.24	hypothetical protein; conserved	TcChr19-S:174786-176777(-)	663	9.15e-07	62649.7	47255.6	0.754284	0.0405216	-0.40682	TcCLB.510859.24	14	T	STE/STE7/MEK1/MAP2K1	DDNKLSETDGSPTK*	1.141
sAGPNASLLmHsTTR	0.027457	1866.89	TcCLB.504643.49	hypothetical protein; conserved (fragment)	TcChr35-S:1079353-1080861(-)	503	2.74e-06	22995.7	16126.9	0.701301	0.0445406	-0.511895	TcCLB.504643.49	12	S	STE/STE7/MEK1/MAP2K1	NASLLMHSTTR****	1.141
tKVTAsAnGLGPGVSLNK	8.67e-08	2481.38	TcCLB.506543.100	hypothetical protein; conserved	TcChr40-S:1825570-1827987(-)	805	1.13e-11	78309.7	51318.4	0.655327	0.0234268	-0.609713	TcCLB.506543.100	1	T	STE/STE7/MEK1/MAP2K1	*******TKVTASAN	1.141
tELMGQLIsNCGCsTGSASRPSSAVSAVNR	3.65e-05	3621.58	TcCLB.510149.60	hypothetical protein; conserved	TcChr36-S:145298-145816(-)	172	1.93e-09	38459.2	60280.1	1.56738	0.00506397	0.648354	TcCLB.510149.60	1	T	STE/STE7/MEK1/MAP2K2	*******TELMGQLI	9
tEASSEAPVsPK	2.06e-06	1739.88	TcCLB.507083.109	hypothetical protein; conserved (fragment)	TcChr25-S:344674-359217(+)	4848	2.81e-10	70940.9	42550.7	0.599804	0.046183	-0.737437	TcCLB.507083.109	1	T	STE/STE7/MEK1/MAP2K2	*******TEASSEAP	9
tsYTEEDLAKEPPPTTSGEYFGVSLQEFDR	6.36e-05	3930.85	TcCLB.509585.10	dynein heavy chain; putative	TcChr14-S:549849-560969(-)	3706	1.66e-09	89736.7	128385	1.43069	0.0355011	0.516709	TcCLB.509585.10	1	T	STE/STE7/MEK3/MAP2K3	*******TSYTEEDL	4.309
tSLPLCQSLsSPSMRPR	0.00021779	2293.11	TcCLB.509585.10	dynein heavy chain; putative	TcChr14-S:549849-560969(-)	3706	1.19e-08	52978.7	42218.8	0.7969	0.0202738	-0.327529	TcCLB.509585.10	1	T	STE/STE7/MEK3/MAP2K3	*******TSYTEEDL	4.309
eDTQDQNKtHyVTHR	0.00364916	2489.11	TcCLB.511573.40	mitogen-activated protein kinase; putative	TcChr12-S:142470-143690(+)	406	2.56e-07	74194.8	55835.2	0.75255	0.0314866	-0.410141	TcCLB.511573.40	9	T	STE/STE7/MEK3/MAP2K3	DTQDQNKTHYVTHR*	4.309
iIDFGSSCYLTDNLsSYVQSR	1.08e-11	2801.28	TcCLB.506869.60	protein kinase; putative	TcChr10-S:431795-433609(-)	604	2.59e-16	84898.6	107127	1.26182	0.0440972	0.335508	TcCLB.506869.60	15	S	STE/STE7/MEK3/MAP2K4	CYLTDNLSSYVQSR*	1.325
tNsLNTNmDLDGNPVLAPPLINELFPPLPK	1.63e-06	3797.97	TcCLB.507925.50	hypothetical protein; conserved	TcChr32-S:393707-399298(+)	1863	5.14e-11	77591.1	57186.2	0.73702	0.0258125	-0.440225	TcCLB.507925.50	3	S	STE/STE7/MEK3/MAP2K4	*****TNSLNTNMDL	1.325
stGDVNSAGDILDGFFSHPSLPYNPSVGEGGDSLTK	0.00432985	3987.83	TcCLB.508541.190	cell cycle sequence binding phosphoprotein (RBP33); putative	TcChr38-S:327288-329309(+)	673	1.43e-07	78967.2	102131	1.29334	0.0414521	0.3711	TcCLB.508541.190	2	T	STE/STE7/MEK3/MAP2K6	******STGDVNSAG	8.35
lVPLPStGSPIQYRPK	0.00298446	2290.29	TcCLB.507099.40	hypothetical protein; conserved	TcChr14-S:495847-509118(-)	4423	4.84e-07	83416.3	66346	0.79536	0.0480623	-0.330321	TcCLB.507099.40	7	T	STE/STE7/MEK3/MAP2K6	*LVPLPSTGSPIQYR	8.35
sILNTVLDTADGsDDDEVmR	0.110484	2490.11	TcCLB.510565.50	hypothetical protein; conserved	TcChr33-S:544418-546235(+)	605	4.1e-06	22888.2	17574.9	0.767857	0.0173102	-0.38109	TcCLB.510565.50	1	T	STE/STE7/MEK3/MAP2K6	*******TGFVRPSA	8.35
lHSATtGSmDHSGASLPLVIQHGESQGQK	0.00568165	3526.73	TcCLB.510055.100	hypothetical protein; conserved	TcChr17-S:504866-509377(+)	1503	2.09e-07	62377.9	45447.1	0.728576	0.0356073	-0.456848	TcCLB.510055.100	6	T	STE/STE7/MEK3/MAP2K6	**LHSATTGSMDHSG	8.35
tGFVRPSAPNELLATIPSALsRR	6.56e-05	2761.47	TcCLB.510565.50	hypothetical protein; conserved	TcChr33-S:544418-546235(+)	605	6.1e-09	48925.9	34226.9	0.699567	0.0234548	-0.515465	TcCLB.510565.50	1	T	STE/STE7/MEK3/MAP2K6	*******TGFVRPSA	8.35
tGQLVVRPPNLsASLNGR	0.0482588	2187.17	TcCLB.506945.50	hypothetical protein; conserved	TcChr32-S:899948-902350(+)	800	6.66e-06	12482.9	8620.4	0.690578	0.0254865	-0.534123	TcCLB.506945.50	1	T	STE/STE7/MEK3/MAP2K6	*******TGQLVVRP	8.35
lNAITSMLTSNEYETAsPTIQR	2.09e-05	2748.32	TcCLB.510317.7	hypothetical protein; conserved (fragment)	TcChr36-S:679268-683104(+)	1279	7.16e-10	18061.9	21937.8	1.21459	0.0268792	0.280466	TcCLB.510317.7	17	S	STE/STE7/MEK7/MAP2K7	SNEYETASPTIQR**	8.815
kAHRDPmtPTGSSLTSAPHGISVVGITPR	9.25e-05	3523.83	TcCLB.504153.150	Unc104-like kinesin; putative	TcChr39-S:690617-695212(-)	1531	4.77e-09	40888.5	30680.2	0.750338	0.0389868	-0.414387	TcCLB.504153.150	8	T	STE/STE7/MEK7/MAP2K7	KAHRDPMTPTGSSLT	8.815
nAsPIADVASmPFSK	0.034084	2088.03	TcCLB.511041.50	flagellum transition zone component; putative	TcChr37-S:287988-290318(+)	776	2.73e-06	30739	22329	0.726407	0.0216456	-0.46115	TcCLB.511041.50	3	S	STE/STE7/MEK7/MAP2K7	*****NASPIADVAS	8.815
sLAsPLLVAVPVTNNTPK	4.67e-09	2358.34	TcCLB.509149.70	hypothetical protein; conserved	TcChr27-S:575582-576595(+)	337	8.07e-13	38943.3	27379.9	0.703071	0.0429311	-0.508257	TcCLB.509149.70	4	S	STE/STE7/MEK7/MAP2K7	****SLASPLLVAVP	8.815
rLAtPPPVDGR	0.227143	1486.79	TcCLB.511445.20	radial spoke protein 3; putative	TcChr39-S:294511-295515(+)	334	5.41e-05	14080.9	9871.46	0.701054	0.0224166	-0.512403	TcCLB.511445.20	4	T	STE/STE7/MEK7/MAP2K7	****RLATPPPVDGR	8.815
kGSNNNQQANSGAtPAQAEEK	0.470409	2910.44	TcCLB.506211.60	RNA-binding protein; putative	TcChr40-S:414089-415729(-)	546	1.9e-05	26319.8	17418.3	0.661795	0.00892269	-0.595543	TcCLB.506211.60	14	T	STE/STE7/MEK7/MAP2K7	QQANSGATPAQAEEK	8.815
lFALLERPIEGTDESDVYYyPGTPADEMQR	1.97e-07	3783.75	TcCLB.511363.4	hypothetical protein; conserved	TcChr40-S:176639-177388(-)	250	5.77e-12	16298.8	22518.7	1.38161	0.043633	0.466355	TcCLB.511363.4	20	Y	TK/Axl/MER	DESDVYYYPGTPADE	13.6
gFSCQPVEGAmyAFPTIELPEK	1.06e-06	3092.46	TcCLB.506529.430	alanine aminotransferase; putative;glutamic--alanine transaminase; putative;glutamic--pyruvic transaminase; putative	TcChr6-S:128069-129562(-)	497	3.07e-11	20208.5	16016.9	0.79258	0.0274772	-0.335371	TcCLB.506529.430	12	Y	TK/Eph/EphB1	QPVEGAMYAFPTIEL	10.317
fILDLGNITTPyASPK	0.00382679	2287.23	TcCLB.503551.20	hypothetical protein; conserved	TcChr26-S:173998-176346(+)	782	2.36e-07	41774.9	29150.4	0.697798	0.0321269	-0.519118	TcCLB.503551.20	12	Y	TK/Jak/JAK2	LGNITTPYASPK***	12.549
aEADNQPEFCDqEVQEPRPHTPEEEyPAEEPNTYPEEEPR	0.00892526	5160.17	TcCLB.510957.9	calpain-like cysteine peptidase; putative	TcChr9-S:439745-440791(+)	349	4.25e-06	27973.7	46158.2	1.65006	0.0497546	0.722515	TcCLB.510957.9	26	Y	TK/Met/RON	PHTPEEEYPAEEPNT	11.188
rRtSYTEEDLAKEPPPTTSGEYFGVSLQEFDR	0.00597334	4243.05	TcCLB.509585.10	dynein heavy chain; putative	TcChr14-S:549849-560969(-)	3706	2.4e-07	39015.7	29457.1	0.755006	0.020189	-0.40544	TcCLB.509585.10	3	Y	TK/Src/SrcA/FYN	*****TSYTEEDLAK	6.401
yANAAAAAGLGETADVVSNEVDEADEGNsDDNNDNAEEVEDEMPATNGGGR	2.27e-05	5448.26	TcCLB.510317.7	hypothetical protein; conserved (fragment)	TcChr36-S:679268-683104(+)	1279	1.46e-08	11286.2	25518.9	2.26106	0.0116404	1.177	TcCLB.510317.7	1	Y	TK/Src/SrcA/YES	*******YANAAAAA	4.044
sSSVDyTQDTPLFALSPVDGR	0.0377456	2376.05	TcCLB.503855.30	adenylosuccinate lyase; putative (ADSL)	TcChr8-S:146790-148178(-)	462	1.53e-06	1810.77	3907.99	2.15819	0.045825	1.10982	TcCLB.503855.30	6	Y	TK/Src/SrcA/YES	**SSSVDYTQDTPLF	4.044
ySVVSTFTNsPFVAVLEDTENNEDDEKELIR	5.01e-13	4097.97	TcCLB.511571.20	hypothetical protein; conserved	TcChr12-S:129573-130466(+)	297	1.63e-17	18141.1	10605.6	0.584615	0.04807	-0.77444	TcCLB.511571.20	1	Y	TK/Src/SrcA/YES	*******YSVVSTFT	4.044
lAMNLLVTGDVPEFyVPDADRSmDAPR	1.92e-05	3316.56	TcCLB.506527.4	hypothetical protein; conserved (fragment)	TcChr40-S:587560-588990(+)	477	7.05e-10	5984.4	3864.94	0.645835	0.0104922	-0.630762	TcCLB.506527.4	15	Y	TK/Src/SrcB/HCK	TGDVPEFYVPDADRS	8.801
yRLPFDADVVsADNTESALPK	2.34e-07	2845.43	TcCLB.508731.9	hypothetical protein; conserved (fragment)	TcChr14-S:395073-396329(-)	419	8.13e-12	39624.4	30793	0.777122	0.0293733	-0.363787	TcCLB.508731.9	1	Y	TK/Src/SrcB/LYN	*******YRLPFDAD	5.358
yRLPFDADVVsADNTESALPK	0.480453	2845.43	TcCLB.508731.9	hypothetical protein; conserved (fragment)	TcChr14-S:395073-396329(-)	419	2.12e-05	25422.2	19382.7	0.762434	0.00219888	-0.391316	TcCLB.508731.9	1	Y	TK/Src/SrcB/LYN	*******YRLPFDAD	5.358
iANQQsSSPRPGTnVGAAPFIPGGK	0.00847846	2989.54	TcCLB.506945.260	hypothetical protein; conserved	TcChr32-S:932501-933628(+)	375	4.32e-07	52791	40294.4	0.763282	0.0354406	-0.389712	TcCLB.506945.260	6	Y	TK/Src/SRM/PTK6	**VPYQFYQMHPQVP	4.177
eDTQDQNKtHyVTHR	0.00364916	2489.11	TcCLB.511573.40	mitogen-activated protein kinase; putative	TcChr12-S:142470-143690(+)	406	2.56e-07	74194.8	55835.2	0.75255	0.0314866	-0.410141	TcCLB.511573.40	11	Y	TK/Src/SRM/PTK6	QDQNKTHYVTHR***	4.177
kLSPSEPNVAyICSR	2.87e-05	2326.17	TcCLB.507993.80	glycogen synthase kinase 3; putative	TcChr40-S:703737-704798(-)	353	2.24e-09	32172.5	25086.7	0.779756	0.0423379	-0.358905	TcCLB.507993.80	11	Y	TK/Tec/ITK	PSEPNVAYICSR***	2.44
sQSGKEDEGVWAVyYTRPPTPESKPQNFNASSAEK	0.00176837	4880.44	TcCLB.506251.30	hypothetical protein; conserved	TcChr37-S:221153-222742(+)	529	8.43e-08	53284.7	42267	0.793231	0.0178325	-0.334187	TcCLB.506251.30	14	Y	TK/VEGFR/FLT4	DEGVWAVYYTRPPTP	5.414
kLSRHDEyPQEESPK	0.269792	2609.35	TcCLB.508555.60	cytoskeleton-associated protein CAP5.5; putative;cysteine peptidase; Clan CA; family C2; putative	TcChr31-S:806208-808628(+)	806	1.66e-05	47115.6	34974.3	0.742309	0.0450493	-0.429909	TcCLB.508555.60	8	Y	TK/VEGFR/FLT4	KLSRHDEYPQEESPK	5.414
lSFLDSFRSsGGGsFVSQDESLGINPDETHTR	0.132059	3830.68	TcCLB.506399.30	hypothetical protein; conserved	TcChr26-S:292151-293980(-)	609	9.23e-06	9391.63	17424.6	1.85533	0.0123662	0.891677	TcCLB.506399.30	10	S	TKL/LISK/LIMK/LIMK1	FLDSFRSSGGGSFVS	9
rASHNPNESHPNNSQTSAGPPDAtGGQQPGEDR	0.279927	3718.62	TcCLB.507669.70	dynein intermediate chain; putative	TcChr26-S:687628-689631(-)	667	2.65e-05	1061.69	1777.01	1.67375	0.0162965	0.74308	TcCLB.507669.70	24	T	TKL/LISK/LIMK/LIMK1	SAGPPDATGGQQPGE	9
sGRPEEGHYGNEESQsPTVPR	8.34e-06	2434.01	TcCLB.507611.10	retrotransposon hot spot (RHS) protein; putative	TcChr37-S:1391-4231(-)	946	7.09e-10	17689.7	14107.5	0.797496	0.0296553	-0.326451	TcCLB.507611.10	1	S	TKL/LISK/LIMK/LIMK1	*******SGRPEEGH	9
rAsGGTRYPNVVQGQVQCWNK	0.0165876	3010.5	TcCLB.509099.20	hypothetical protein; conserved	TcChr23-S:357083-360235(-)	1050	6.64e-07	123459	95473.9	0.773327	0.033735	-0.370849	TcCLB.509099.20	3	S	TKL/LISK/LIMK/LIMK1	*****RASGGTRYPN	9
nGNSDDINGsGDDDDDARR	0.0211468	2315.91	TcCLB.509543.40	hypothetical protein; conserved	TcChr29-S:562536-564578(-)	680	3.94e-06	21239.5	16356.5	0.770099	0.0378313	-0.376884	TcCLB.509543.40	10	S	TKL/LISK/LIMK/LIMK1	NSDDINGSGDDDDDA	9
vAAGsGNAENGQLQHVTLVDKQPLR	5.22e-08	3139.65	TcCLB.437545.10	3-oxo-5-alpha-steroid 4-dehydrogenase; putative;3-oxo-5-alpha-steroid 4-dehydrogenase (pseudogene); putative	TcChr40-S:1808714-1809616(-)	300	2.88e-12	53413.8	40360.1	0.755612	0.0303183	-0.404282	TcCLB.437545.10	5	S	TKL/LISK/LIMK/LIMK1	***VAAGSGNAENGQ	9
iAAEEIMIGQmPSEEVETLGLsGTFAQR	1.5e-05	3331.59	TcCLB.509589.30	MCAK-like kinesin; putative	TcChr14-S:543423-545597(-)	724	5.27e-10	11198.8	8064.34	0.720104	0.0437397	-0.473722	TcCLB.509589.30	22	S	TKL/LISK/LIMK/LIMK1	EVETLGLSGTFAQR*	9
sGGPTLPGENLLSLKEQsGLEGPTFAPSEYR	0.000103813	3768.91	TcCLB.509067.50	hypothetical protein; conserved	TcChr35-S:281707-283635(-)	642	2.53e-09	85629.8	60029.1	0.70103	0.0189045	-0.512451	TcCLB.509067.50	1	S	TKL/LISK/LIMK/LIMK1	*******SGGPTLPG	9
sGGPTLPGENLLSLKEQsGLEGPTFAPSEYR	0.000103813	3768.91	TcCLB.509067.50	hypothetical protein; conserved	TcChr35-S:281707-283635(-)	642	2.53e-09	85629.8	60029.1	0.70103	0.0189045	-0.512451	TcCLB.509067.50	18	S	TKL/LISK/LIMK/LIMK1	LLSLKEQSGLEGPTF	9
lNAASPAAEASPNTTPSSFFLPVIsGGGSPK	4.35e-06	3509.78	TcCLB.509805.210	hypothetical protein; conserved	TcChr40-S:1000573-1003593(+)	1006	7.72e-11	102898	72096.4	0.700658	0.010738	-0.513217	TcCLB.509805.210	25	S	TKL/LISK/LIMK/LIMK1	SFFLPVISGGGSPKR	9
qGsGLAGVAGNHK	0.126009	1732.9	TcCLB.503811.80	hypothetical protein; conserved	TcChr36-S:167260-169125(-)	621	1.94e-05	89977.6	60137.9	0.668366	0.034127	-0.58129	TcCLB.503811.80	3	S	TKL/LISK/LIMK/LIMK1	*****QGSGLAGVAG	9
nTTTTTTNNTDSDGIDGGsGRFR	0.0342353	2696.19	TcCLB.510719.90	hypothetical protein; conserved	TcChr16-S:194333-195616(+)	427	1.66e-06	27937.3	18610.5	0.666151	0.0157607	-0.586079	TcCLB.510719.90	19	S	TKL/LISK/LIMK/LIMK1	SDGIDGGSGRFR***	9
nAPEsGnEEEGANTQPPGTQESWVENEEAAKGDDALD	0.0639431	4423.94	TcCLB.507831.60	heat shock protein 110; putative	TcChr40-S:1044569-1047067(+)	832	5.43e-06	27512.6	17208	0.625461	0.0154046	-0.677008	TcCLB.507831.60	5	S	TKL/LISK/LIMK/LIMK1	***NAPESGNEEEGA	9
rIsGPVPATTAGLASTLFGEELNR	0.000212266	2765.43	TcCLB.503865.70	hypothetical protein; conserved	TcChr34-S:293914-296142(-)	742	1.25e-08	6180.88	3242.95	0.524675	0.0242346	-0.930504	TcCLB.503865.70	3	S	TKL/LISK/LIMK/LIMK1	*****RISGPVPATT	9
aILDSsMSGPAIDFAGSVIK	0.0218222	2516.3	TcCLB.509247.30	hypothetical protein; conserved	TcChr10-S:103625-110614(+)	2329	7.6e-07	55551	99638.3	1.79364	0.0110821	0.842887	TcCLB.509247.30	6	T	TKL/MLK/ILK/ILK	**TQHSATISPIPLL	3.003
tQHSAtISPIPLLELLQER	7.39e-06	2454.3	TcCLB.509247.30	hypothetical protein; conserved	TcChr10-S:103625-110614(+)	2329	5.48e-10	19112	14569	0.762299	0.0228117	-0.391571	TcCLB.509247.30	6	T	TKL/MLK/ILK/ILK	**TQHSATISPIPLL	3.003
tVPLGFTFsFPTEQK	0.0165279	2236.15	TcCLB.508951.20	hexokinase; putative	TcChr5-S:117169-118584(-)	471	1.61e-06	29528.3	22471	0.760999	0.000207456	-0.394034	TcCLB.508951.20	1	T	TKL/MLK/ILK/ILK	*******TVPLGFTF	3.003
sAQTGISAPVAVsHYRFSPPR	0.0229821	2536.28	TcCLB.509967.70	katanin; putative	TcChr10-S:187410-189455(+)	681	1.06e-06	52821.6	34707.8	0.657076	0.0197646	-0.605868	TcCLB.509967.70	1	S	TKL/MLK/ILK/ILK	*******SAQTGISA	3.003
tTDGGLGIFLTGAEILDEENIRGFENLEDGDsLKNEVK	2.77e-15	4875.45	TcCLB.506941.60	phospholipid-translocating P-type ATPase (flippase); putative	TcChr32-S:630319-633972(-)	1217	1.06e-19	453240	275312	0.607432	0.025233	-0.719206	TcCLB.506941.60	32	S	TKL/MLK/ILK/ILK	ENLEDGDSLKNEVK*	3.003
tVPLGFtFSFPTEQK	0.0610271	2236.15	TcCLB.508951.20	hexokinase; putative	TcChr5-S:117169-118584(-)	471	5.93e-06	5009.42	2840.04	0.566939	0.0217397	-0.818734	TcCLB.508951.20	1	T	TKL/MLK/ILK/ILK	*******TVPLGFTF	3.003
kVsGAVPEGEEYPTEAEAERPVATDEDGHAPETASVPEEHR	0.000551048	4910.29	TcCLB.509157.120	hypothetical protein; conserved	TcChr35-S:738123-741278(+)	1051	4.3e-08	25661.9	18802.2	0.732691	0.022467	-0.448724	TcCLB.509157.120	3	S	TKL/MLK/MLK/MLK1	*****KVSGAVPEGE	2.6
sAGPNASLLmHsTTR	0.027457	1866.89	TcCLB.504643.49	hypothetical protein; conserved (fragment)	TcChr35-S:1079353-1080861(-)	503	2.74e-06	22995.7	16126.9	0.701301	0.0445406	-0.511895	TcCLB.504643.49	1	S	TKL/MLK/MLK/MLK1	*******SAGPNASL	2.6
rKsAIDATADITDTVK	0.402823	2471.36	TcCLB.506513.90	hypothetical protein; conserved	TcChr17-S:593698-594948(+)	416	5.89e-05	73487.6	58411	0.794842	0.0435756	-0.331259	TcCLB.506513.90	3	S	TKL/MLK/MLK/MLK3	*****RKSAIDATAD	3.6
ksVTLVKEPPCAIVIPAAETK	0.0192126	3314.91	TcCLB.510535.20	hypothetical protein; conserved	TcChr13-S:453100-461118(+)	2672	8.19e-06	84740.2	59396.2	0.700921	0.0133392	-0.512676	TcCLB.510535.20	2	S	TKL/MLK/MLK/MLK3	******KSVTLVKEP	3.6
tTVASAATAVASVTsPPLLSSAVSSK	0.000303819	2940.58	TcCLB.509099.150	protein kinase; putative	TcChr23-S:390134-392554(-)	806	1.88e-08	28606.1	22428.2	0.784037	0.0104752	-0.351007	TcCLB.509099.150	1	T	TKL/MLK/MLK/ZAK	*******TTVASAAT	9.25
tQHSAtISPIPLLELLQER	7.39e-06	2454.3	TcCLB.509247.30	hypothetical protein; conserved	TcChr10-S:103625-110614(+)	2329	5.48e-10	19112	14569	0.762299	0.0228117	-0.391571	TcCLB.509247.30	1	T	TKL/MLK/MLK/ZAK	*******TQHSATIS	9.25
sAAATLHQHDIGTLLSsKNITAPPR	0.266205	3136.68	TcCLB.509247.30	hypothetical protein; conserved	TcChr10-S:103625-110614(+)	2329	2.24e-05	47843.3	30378.9	0.634966	0.0254939	-0.655248	TcCLB.509247.30	1	T	TKL/MLK/MLK/ZAK	*******TQHSATIS	9.25
tTDGGLGIFLTGAEILDEENIRGFENLEDGDsLKNEVK	2.77e-15	4875.45	TcCLB.506941.60	phospholipid-translocating P-type ATPase (flippase); putative	TcChr32-S:630319-633972(-)	1217	1.06e-19	453240	275312	0.607432	0.025233	-0.719206	TcCLB.506941.60	1	T	TKL/MLK/MLK/ZAK	*******TTDGGLGI	9.25
tQHGHGHGQNNTsSPRGPR	0.202155	2333.07	TcCLB.510089.200	hypothetical protein; conserved	TcChr40-S:1774627-1775664(-)	345	1.8e-05	17561.6	8708.98	0.495912	0.0230596	-1.01185	TcCLB.510089.200	1	T	TKL/MLK/MLK/ZAK	*******TQHGHGHG	9.25
tNsLNTNmDLDGNPVLAPPLINELFPPLPK	1.63e-06	3797.97	TcCLB.507925.50	hypothetical protein; conserved	TcChr32-S:393707-399298(+)	1863	5.14e-11	77591.1	57186.2	0.73702	0.0258125	-0.440225	TcCLB.507925.50	1	T	TKL/MLK/TAK1/TAK1	*******TNSLNTNM	4.942
sEFIESPIFITGNtTAPVSVSSQLTVK	0.100675	3389.78	TcCLB.507735.50	hypothetical protein; conserved (pseudogene)	TcChr34-S:805689-811841(+)	2050	3.84e-06	9573.11	6758.52	0.70599	0.00919848	-0.502279	TcCLB.507735.50	1	T	TKL/MLK/TAK1/TAK1	*******TNIYHQHL	4.942
tNIYHQHLLDAPmRQsLK	0.28388	2718.41	TcCLB.507735.50	hypothetical protein; conserved (pseudogene)	TcChr34-S:805689-811841(+)	2050	1.78e-05	51494	34063.9	0.661512	0.0150174	-0.596161	TcCLB.507735.50	1	T	TKL/MLK/TAK1/TAK1	*******TNIYHQHL	4.942
kGsNNNqQANSGATPAQAEEK	9.18e-06	2911.43	TcCLB.506211.60	RNA-binding protein; putative	TcChr40-S:414089-415729(-)	546	2.74e-10	122243	77301.1	0.632356	0.0283726	-0.66119	TcCLB.506211.60	3	S	TKL/MLK/TAK1/TAK1	*****KGSNNNQQAN	4.942
sEPAGCSVGCmItASHNPATDNGLK	0.00510671	3263.47	TcCLB.508569.80	phosphoacetylglucosamine mutase; putative;acetylglucosaminephosphomutase; putative;N-acetylglucosamine-phosphate mutase; putative	TcChr19-S:265503-267335(-)	610	2.5e-07	118653	83242.2	0.701558	0.0337645	-0.511366	TcCLB.508569.80	1	S	TKL/RAF/RAF/RAF1	*******SEPAGCSV	2.47
kVSGAVPEGEEYPTEAERPVATDEDGRAPETAsVPEEHR	0.200177	4729.24	TcCLB.509157.120	hypothetical protein; conserved	TcChr35-S:738123-741278(+)	1051	1.23e-05	39453.6	25831.7	0.654738	0.0301127	-0.611011	TcCLB.509157.120	33	S	TKL/RAF/RAF/RAF1	GRAPETASVPEEHR*	2.47
tSLPLCQSLsSPSMRPR	0.00021779	2293.11	TcCLB.509585.10	dynein heavy chain; putative	TcChr14-S:549849-560969(-)	3706	1.19e-08	52978.7	42218.8	0.7969	0.0202738	-0.327529	TcCLB.509585.10	10	S	TKL/STKR/STKR1/BMPR1B	LPLCQSLSSPSMRPR	5.158
sVLSSSQsSRPSATDSTLNVLTPLLDNYTIPITR	6.5e-08	3942.02	TcCLB.508569.130	6-phosphofructo-2-kinase/fructose-2;6-biphosphatase; putative	TcChr19-S:275057-277306(-)	749	2.37e-12	20429.6	16007.6	0.783549	0.0327361	-0.351904	TcCLB.508569.130	1	S	TKL/STKR/STKR1/BMPR1B	*******SVLSSSQS	5.158
tLHEEPNALEIADTAGDVSALAsSATDLVTLGK	2.63e-13	3846.96	TcCLB.506633.20	hypothetical protein; conserved	TcChr34-S:689358-694220(+)	1620	8.99e-18	17714.3	12678.3	0.715709	0.0304003	-0.482554	TcCLB.506633.20	23	S	TKL/STKR/STKR1/BMPR1B	GDVSALASSATDLVT	5.158
sLAsPLLVAVPVTNNTPK	4.67e-09	2358.34	TcCLB.509149.70	hypothetical protein; conserved	TcChr27-S:575582-576595(+)	337	8.07e-13	38943.3	27379.9	0.703071	0.0429311	-0.508257	TcCLB.509149.70	1	S	TKL/STKR/STKR1/BMPR1B	*******SLASPLLV	5.158
sVLSsSQSSRPSATDSTLNVLTPLLDNYTIPITR	0.305179	3942	TcCLB.508569.130	6-phosphofructo-2-kinase/fructose-2;6-biphosphatase; putative	TcChr19-S:275057-277306(-)	749	1.06e-05	19407.9	13018.2	0.67077	0.0280055	-0.576111	TcCLB.508569.130	1	S	TKL/STKR/STKR1/BMPR1B	*******SVLSSSQS	5.158
tEASSEAPVsPK	2.06e-06	1739.88	TcCLB.507083.109	hypothetical protein; conserved (fragment)	TcChr25-S:344674-359217(+)	4848	2.81e-10	70940.9	42550.7	0.599804	0.046183	-0.737437	TcCLB.507083.109	10	S	TKL/STKR/STKR1/BMPR1B	ASSEAPVSPK*****	5.158
sLASITqIGDVSEEtGTPVGDVILGR	0.0029364	2923.46	TcCLB.506795.20	hypothetical protein; conserved	TcChr11-S:420464-422950(+)	828	1.26e-07	2595.72	1057.27	0.407312	0.037868	-1.29579	TcCLB.506795.20	1	S	TKL/STKR/STKR1/BMPR1B	*******SLASITQI	5.158
sSSVDyTQDTPLFALSPVDGR	0.0377456	2376.05	TcCLB.503855.30	adenylosuccinate lyase; putative (ADSL)	TcChr8-S:146790-148178(-)	462	1.53e-06	1810.77	3907.99	2.15819	0.045825	1.10982	TcCLB.503855.30	1	S	TKL/STKR/STKR1/TGFbR1	*******SSSVDYTQ	5.333
tELMGQLIsNCGCsTGSASRPSSAVSAVNR	3.65e-05	3621.58	TcCLB.510149.60	hypothetical protein; conserved	TcChr36-S:145298-145816(-)	172	1.93e-09	38459.2	60280.1	1.56738	0.00506397	0.648354	TcCLB.510149.60	14	S	TKL/STKR/STKR1/TGFbR1	LISNCGCSTGSASRP	5.333
vGGLVSsMLADDSLVHLR	9.07e-05	2177.11	TcCLB.506891.10	Metal-binding domain-containing protein	TcChr9-S:96806-100072(-)	1088	6.8e-09	10823	13807.9	1.27579	0.0311577	0.351389	TcCLB.506891.10	7	S	TKL/STKR/STKR1/TGFbR1	*VGGLVSSMLADDSL	5.333
sMsPLSATSSLLPSSK	0.475581	2130.1	TcCLB.507867.80	hypothetical protein; conserved	TcChr28-S:639218-645001(+)	1927	4e-05	13395.3	10570.5	0.789122	0.0115303	-0.341679	TcCLB.507867.80	1	S	TKL/STKR/STKR1/TGFbR1	*******SMSPLSAT	5.333
sMsPLSATSSLLPSSK	0.475581	2130.1	TcCLB.507867.80	hypothetical protein; conserved	TcChr28-S:639218-645001(+)	1927	4e-05	13395.3	10570.5	0.789122	0.0115303	-0.341679	TcCLB.507867.80	3	S	TKL/STKR/STKR1/TGFbR1	*****SMSPLSATSS	5.333
lGYYLENAmsTSAVPFLPDVNK	5.11e-07	2982.48	TcCLB.507831.60	heat shock protein 110; putative	TcChr40-S:1044569-1047067(+)	832	2.01e-11	6973.81	5481.97	0.78608	0.0405264	-0.347252	TcCLB.507831.60	10	S	TKL/STKR/STKR1/TGFbR1	YYLENAMSTSAVPFL	5.333
tITVVSHLGEPLsPR	0.00698539	1914.01	TcCLB.506179.59	ATP-dependent RNA helicase; putative (fragment)	TcChr14-S:97278-98330(-)	351	9.57e-07	23348	17722.3	0.759047	0.0447251	-0.397738	TcCLB.506179.59	13	S	TKL/STKR/STKR1/TGFbR1	SHLGEPLSPR*****	5.333
lVDALLQDPTAsPK	0.0177572	2005.09	TcCLB.509979.60	sec1 family transport protein; putative	TcChr33-S:844998-846881(+)	627	2.72e-06	84679.3	63173.5	0.746032	0.039245	-0.42269	TcCLB.509979.60	12	S	TKL/STKR/STKR1/TGFbR1	LLQDPTASPK*****	5.333
kNVVSFVFADGSSAAPAAsAR	0.00299161	2589.33	TcCLB.508307.125	hypothetical protein; conserved	TcChr37-S:647845-648360(+)	171	1.48e-07	86266.5	63292.9	0.73369	0.0103235	-0.446757	TcCLB.508307.125	19	S	TKL/STKR/STKR1/TGFbR1	SSAAPAASAR*****	5.333
tLVNPNTQPSQVECLLsSK	0.234465	2720.38	TcCLB.510763.60	hypothetical protein; conserved	TcChr39-S:1767426-1768151(+)	241	9.2e-06	65440.1	47996.4	0.733441	0.00255004	-0.447247	TcCLB.510763.60	17	S	TKL/STKR/STKR1/TGFbR1	SQVECLLSSK*****	5.333
kNVVSFVFADGSSAAPAAsAR	0.000156526	2589.33	TcCLB.508307.125	hypothetical protein; conserved	TcChr37-S:647845-648360(+)	171	1.06e-08	10927.9	7680.17	0.702807	0.00998664	-0.5088	TcCLB.508307.125	19	S	TKL/STKR/STKR1/TGFbR1	SSAAPAASAR*****	5.333
iGLGGIGTFTSSsSSPK	0.0920266	2133.1	TcCLB.510089.130	protein kinase; putative	TcChr40-S:1756125-1758002(-)	625	8.08e-06	27910.1	19539.6	0.700091	0.0288774	-0.514386	TcCLB.510089.130	13	S	TKL/STKR/STKR1/TGFbR1	IGTFTSSSSSPK***	5.333
sLmNGPVAADIPDsPPPAAPSKK	0.000573608	3042.61	TcCLB.508719.70	flagellum targeting protein kharon1; putative (KH1)	TcChr37-S:375185-376402(+)	405	3.76e-08	30562.3	21320.4	0.697603	0.0279972	-0.519522	TcCLB.508719.70	1	S	TKL/STKR/STKR1/TGFbR1	*******SLMNGPVA	5.333
sVLSsSQSSRPSATDSTLNVLTPLLDNYTIPITR	0.305179	3942	TcCLB.508569.130	6-phosphofructo-2-kinase/fructose-2;6-biphosphatase; putative	TcChr19-S:275057-277306(-)	749	1.06e-05	19407.9	13018.2	0.67077	0.0280055	-0.576111	TcCLB.508569.130	5	S	TKL/STKR/STKR1/TGFbR1	***SVLSSSQSSRPS	5.333
nINANIAAVPmNIADKsSPR	0.000284227	2649.38	TcCLB.511037.40	hypothetical protein; conserved	TcChr37-S:466675-468429(+)	584	1.91e-08	35575.9	23364.7	0.656758	0.0286076	-0.606567	TcCLB.511037.40	17	S	TKL/STKR/STKR1/TGFbR1	PMNIADKSSPR****	5.333
vQASmQSHCFVVSGPYDVKEAsEIAQ	0.0282709	3488.63	TcCLB.504017.10	basic transcription factor 3a; putative	TcChr18-S:151262-151657(-)	131	7.75e-07	20119.4	12005	0.596689	0.0351757	-0.744948	TcCLB.504017.10	22	S	TKL/STKR/STKR1/TGFbR1	PYDVKEASEIAQ***	5.333
lAEYDALHSSVKPSSPSs	0.124941	2412.2	TcCLB.511573.10	leucine-rich repeat protein; putative	TcChr12-S:138102-138770(+)	222	4.08e-06	17569.2	9784.75	0.556925	0.0208257	-0.844444	TcCLB.511573.10	18	S	TKL/STKR/STKR1/TGFbR1	VKPSSPSS*******	5.333
lNAITSmLTsNEYETASPTIQR	0.0460236	2764.32	TcCLB.510317.7	hypothetical protein; conserved (fragment)	TcChr36-S:679268-683104(+)	1279	2.11e-06	20724.5	15434.6	0.744752	0.0146955	-0.425169	TcCLB.510317.7	10	S	TKL/STKR/STKR2/TGFbR2	AITSMLTSNEYETAS	1.344
nGsSGGAnVPLSLGIILEQR	0.00273362	2291.17	TcCLB.506797.50	hypothetical protein; conserved	TcChr26-S:190611-191870(+)	419	1.76e-07	9129.07	6768.38	0.74141	0.0250951	-0.431657	TcCLB.506797.50	3	S	TKL/STKR/STKR2/TGFbR2	*****NGSSGGANVP	1.344
lHMSAPTGsEDHLR	0.512707	1858.86	TcCLB.511871.100	hypothetical protein; conserved	TcChr15-S:93601-95541(+)	646	5.47e-05	20673.7	13570.6	0.656417	0.036771	-0.607316	TcCLB.511871.100	9	S	TKL/STKR/STKR2/TGFbR2	HMSAPTGSEDHLR**	1.344
NOT FOUND:
TriTryDB ID Peptide Protein
TcCLB.511111.40 kIsVTLPLPQIVSGHVSELR hypothetical protein; conserved
